# Supplementary material for: Synthesis of pyrrolidine-3-carboxylic acid derivatives via asymmetric Michael addition reactions of carboxylate-substituted enones
Source: Royal Society of Chemistry journal article supplement (doi:10.1039/c7ob01484h), 2017-01-01
Supplement: c7ob01484h1.pdf [file c7ob01484h1.pdf]

## Supporting Information

Corrected version March 30, 2018

Synthesis of pyrrolidine-3-carboxylic acid derivatives via asymmetric Michael addition reactions of carboxylate-substituted enones

Feng Yin, Ainash Garifullina, and Fujie Tanaka\*

Chemistry and Chemical Bioengineering Unit, Okinawa Institute of Science and Technology  
Graduate University, 1919-1 Tancha, Onna, Okinawa 904-0495, Japan

|                                                                                                          |     |
|----------------------------------------------------------------------------------------------------------|-----|
| 1. Synthesis of enones -----                                                                             | S2  |
| 2. Synthesis of catalysts -----                                                                          | S3  |
| 3. Screening of catalysts and conditions -----                                                           | S4  |
| 4. Michael addition reactions to afford <b>2</b> -----                                                   | S5  |
| 5. Transformations of <b>2</b> to pyrrolidine-3-carboxylic acid and $\beta^2$ -amino acid derivatives -- | S10 |
| 6. References -----                                                                                      | S16 |
| 7. HPLC charts -----                                                                                     | S17 |
| 8. NMR spectra -----                                                                                     | S31 |

### General

For thin layer chromatography (TLC), Merck silica gel 60 F254 aluminum sheets were used. Flash column chromatography was performed using Merck silica gel 60 (230-400 mesh).  $^1\text{H}$  NMR and  $^{13}\text{C}$  NMR were recorded on a Bruker Avance 400. Proton chemical shifts are reported in ppm downfield from tetramethylsilane or from the residual solvent as internal standard in  $\text{CDCl}_3$  ( $\delta$  7.26 ppm) and in  $\text{CD}_3\text{OD}$  ( $\delta$  3.31 ppm). Carbon chemical shifts were internally referenced to the deuterated solvent signals in  $\text{CDCl}_3$  ( $\delta$  77.0 ppm) and in  $\text{CD}_3\text{OD}$  ( $\delta$  49.0 ppm). High-resolution mass spectra were recorded on a Thermo Scientific LTQ Orbitrap ESI ion trap mass spectrometer. Optical rotations were measured on a Jasco P2200 polarimeter.

### Note

This corrected version was prepared based on the correct structure of **3**, determined from the X-ray crystal structure of a derivative of **3**, which will be reported separately in the future.

## 1. Synthesis of enones

### General procedure for the synthesis of enones

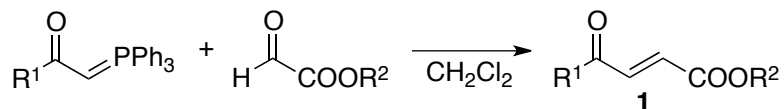

Enones were synthesized according to the reported procedures.<sup>1</sup> To a solution of glyoxylate ester or its derivative (10 mmol) in CH<sub>2</sub>Cl<sub>2</sub> (30 mL), 1-(triphenylphosphoranylidene)-2-propanone or its derivative (33 mmol) was added and the mixture was stirred at room temperature (25°C) for 24 h. The mixture was concentrated and purified by flash column chromatography (hexane/EtOAc) to give enone **1**.

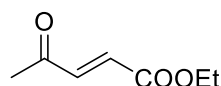

Known compound.<sup>2</sup> Pale yellow oil. <sup>1</sup>H NMR (400 MHz, CDCl<sub>3</sub>): δ 7.01 (d, *J* = 16.1 Hz, 1H), 6.64 (d, *J* = 16.1 Hz, 1H), 4.26 (q, *J* = 7.1 Hz, 2H), 2.35 (s, 3H), 1.32 (t, *J* = 7.1 Hz, 3H). <sup>13</sup>C NMR (100 MHz, CDCl<sub>3</sub>): δ 197.6, 165.4, 139.9, 131.6, 61.4, 28.0, 14.1.

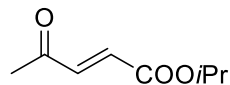

Known compound.<sup>3</sup> Pale yellow oil. <sup>1</sup>H NMR (400 MHz, CDCl<sub>3</sub>): δ 6.96 (d, *J* = 16.1 Hz, 1H), 6.59 (d, *J* = 16.1 Hz, 1H), 5.09 (septet, *J* = 6.2 Hz, 1H), 2.32 (s, 3H), 1.27 (d, *J* = 6.2 Hz, 6H). <sup>13</sup>C NMR (100 MHz, CDCl<sub>3</sub>): δ 197.6, 164.9, 139.7, 132.1, 69.0, 27.9, 21.6.

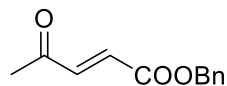

Known compound.<sup>4</sup> Pale yellow oil. <sup>1</sup>H NMR (400 MHz, CDCl<sub>3</sub>): δ 7.51-7.31 (m, 5H), 7.05 (d, *J* = 16.1 Hz, 1H), 6.69 (d, *J* = 16.1 Hz, 1H), 5.25 (s, 2H), 2.35 (s, 3H). <sup>13</sup>C NMR (100 MHz, CDCl<sub>3</sub>): δ 197.4, 165.3, 140.3, 135.2, 128.7, 128.6, 128.4, 67.2, 28.1.

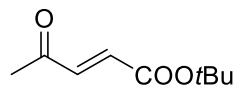

Known compound.<sup>5</sup> Pale yellow oil. <sup>1</sup>H NMR (400 MHz, CDCl<sub>3</sub>): δ 6.91 (d, *J* = 16.1 Hz, 1H), 6.57 (d, *J* = 16.1 Hz, 1H), 2.34 (s, 3H), 1.51 (s, 9H). <sup>13</sup>C NMR (100 MHz, CDCl<sub>3</sub>): δ 197.9, 164.6, 139.2, 133.7, 82.1, 28.0, 27.9.

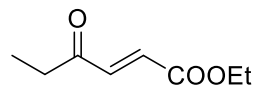

Known compound.<sup>4</sup> Pale yellow oil. <sup>1</sup>H NMR (400 MHz, CDCl<sub>3</sub>): δ 7.04 (d, *J* = 16.0 Hz, 1H), 6.66 (d, *J* = 16.0 Hz, 1H), 4.24 (q, *J* = 7.1 Hz, 2H), 2.65 (q, *J* = 7.2 Hz, 2H), 1.30 (t, *J* = 7.0 Hz, 3H), 1.11 (t, *J* = 7.2 Hz, 3H). <sup>13</sup>C NMR (100 MHz, CDCl<sub>3</sub>): δ 200.1, 165.5, 139.1, 130.6, 61.3,

34.7, 14.1, 7.6.

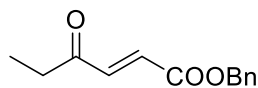

Known compound.<sup>4</sup> Pale yellow oil. <sup>1</sup>H NMR (400 MHz, CDCl<sub>3</sub>): δ 7.48-7.31 (m, 5H), 7.10 (d, *J* = 16.0 Hz, 1H), 6.72 (d, *J* = 16.0 Hz, 1H), 5.24 (s, 2H), 2.66 (q, *J* = 7.2 Hz, 2H), 1.13 (t, *J* = 7.2 Hz, 3H). <sup>13</sup>C NMR (100 MHz, CDCl<sub>3</sub>): δ 200.0, 165.4, 139.6, 135.2, 130.2, 128.6, 128.5, 128.4, 67.1, 34.8, 7.6.

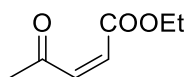

Known compound.<sup>6</sup> This (*Z*)-isomer was generated during the synthesis of the (*E*)-isomer and was purified by flash column chromatography. Pale yellow oil. <sup>1</sup>H NMR (400 MHz, CDCl<sub>3</sub>): δ 6.45 (d, *J* = 12.2 Hz, 1H), 6.02 (d, *J* = 12.2 Hz, 1H), 4.22 (q, *J* = 7.1 Hz, 2H), 2.36 (s, 3H), 1.29 (t, *J* = 7.1 Hz, 3H). <sup>13</sup>C NMR (100 MHz, CDCl<sub>3</sub>): δ 201.3, 165.2, 141.6, 124.7, 61.2, 30.0, 14.0.

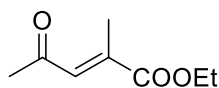

Known compound.<sup>7</sup> Pale yellow oil. <sup>1</sup>H NMR (400 MHz, CDCl<sub>3</sub>): δ 7.07 (s, 1H), 4.25 (q, *J* = 7.1 Hz, 2H), 2.30 (s, 3H), 2.21 (s, 3H), 1.32 (t, *J* = 7.1 Hz, 3H). <sup>13</sup>C NMR (100 MHz, CDCl<sub>3</sub>): δ 199.4, 167.6, 140.9, 132.3, 61.6, 32.1, 14.3, 14.1.

## 2. Synthesis of catalysts

### General procedure for the synthesis of catalysts F and G

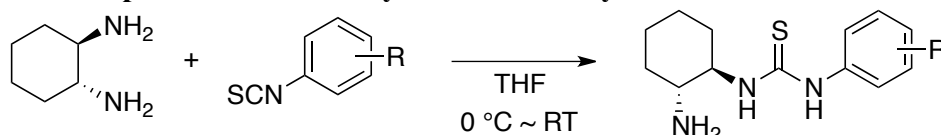

Catalysts **F** and **G** were synthesized according to the reported procedure.<sup>8</sup> To a solution of (1*R*,2*R*)-cyclohexanediamine (154.0 mg, 0.64 mmol) in dry THF (5.0 mL), the corresponding isocyanate (0.70 mmol) was added dropwise at 0 °C. The mixture was stirred at 0 °C for 30 min and at room temperature (24 °C) for 16 h. The mixture was concentrated under reduced pressure and purified by flash column chromatography (CH<sub>2</sub>Cl<sub>2</sub>/MeOH = 9:1) to give the catalyst.

**Catalyst F**: 1-((1*R*,2*R*)-2-aminocyclohexyl)-3-(3,5-bis(trifluoromethyl)phenyl)thiourea<sup>8</sup>

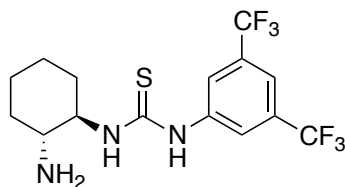

Known compound.<sup>8</sup>

## Catalyst G

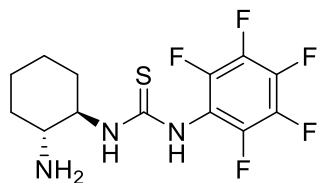

Colorless Solid.  $^1\text{H}$  NMR (400 MHz,  $\text{CDCl}_3$ ):  $\delta$  6.71 (bs, 1H), 3.60-3.30 (m, 1H), 3.02-2.57 (m, 1H), 2.39-1.64 (m, 4H), 1.44-1.07 (m, 4H).  $^{13}\text{C}$  NMR (100 MHz,  $\text{CD}_3\text{OD}$ ):  $\delta$  185.0, 148.5 ( $J_{\text{C,F}} = 246$  Hz), 139.2 ( $J_{\text{C,F}} = 246$  Hz), 116.7, 61.9, 56.0, 34.5, 32.5, 25.9, 25.7. ESI-HRMS: calcd for  $\text{C}_{13}\text{H}_{15}\text{N}_3\text{F}_5\text{S}$  ( $[\text{M}+\text{H}]^+$ ) 340.0901, found 340.0897.

### 3. Screening of catalysts and conditions

#### Procedure for the catalyst screening (Table 1)

To a mixture of catalyst (0.04 mmol) and additive (if used, 0.04 mmol) in solvent (0.5 mL), enone **1** (0.2 mmol) and nitromethane (1.0 mmol) were added at room temperature (24 °C) and the mixture (initially often suspension) was stirred at the same temperature. The progress of the reaction was monitored by TLC. After 48 h (except noted), the mixture was poured into aqueous 1 M HCl solution (1 mL) and extracted with  $\text{CH}_2\text{Cl}_2$ . Organic layers were combined, dried over  $\text{Na}_2\text{SO}_4$ , concentrated, and purified by flash column chromatography (hexane/EtOAc = 4:1) to afford **2**. The ee was determined by chiral-phase HPLC.

**Table S1.** Additional catalyst screening.

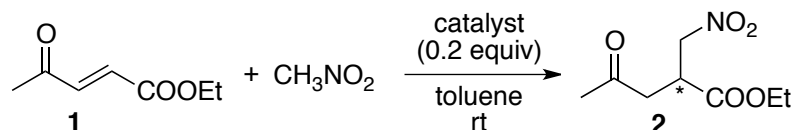

| entry | catalyst | yield (%) | ee (%) |
|-------|----------|-----------|--------|
| 1     |          | 0         | -      |
| 2     |          | 24        | 23     |
| 3     |          | 0         | -      |

| entry | catalyst | yield (%) | ee (%) |
|-------|----------|-----------|--------|
| 4     |          | 3         | -      |
| 5     |          | 33        | -      |

a Conditions: Enone **1** (0.2 mmol), nitromethane (1.0 mmol), and catalyst (0.04 mmol) in toluene (0.5 mL) at 24 °C for 48 h.

**Table S2.** Solvent screening in the catalyst **F**-catalyzed reaction.

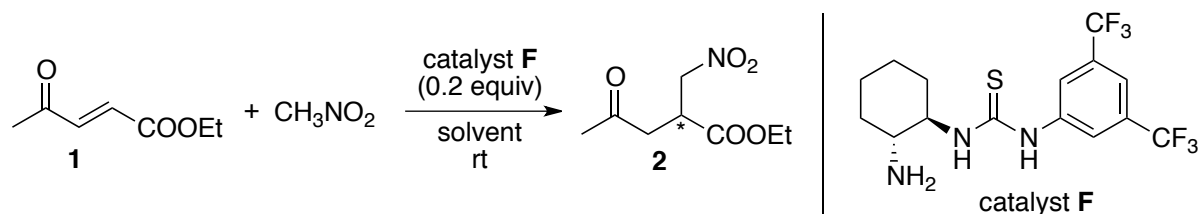

| entry | solvent                  | yield (%) | ee (%) |
|-------|--------------------------|-----------|--------|
| 1     | toluene                  | 51        | 82     |
| 2     | $\text{CH}_2\text{Cl}_2$ | 70        | 85     |
| 3     | $\text{CHCl}_3$          | 62        | 82     |
| 4     | $\text{CH}_3\text{CN}$   | 34        | -      |
| 5     | THF                      | 42        | -      |
| 6     | <i>o</i> -xylene         | 58        | 89     |
| 7     | EtOAc                    | 42        | -      |
| 8     | <i>i</i> -PrOH           | 40        | -      |

a Conditions: Enone **1** (0.2 mmol), nitromethane (1.0 mmol), and catalyst **F** (0.04 mmol) in solvent (0.5 mL) at 24 °C for 48 h.

#### 4. Michael addition reactions to afford **2**

##### General procedure for the Michael addition reactions to afford **2** (Table 2 and Scheme 2)

To a mixture of catalyst **F** (0.04 mmol) and additive (if used, 0.04 mmol) in  $\text{CH}_2\text{Cl}_2$  (0.2 mL), enone (0.2 mmol) and nitroalkane (1.0 mmol) were added at room temperature (24 °C) and the mixture (initially often suspension) was stirred at the same temperature. The progress of the reaction was monitored by TLC. After indicated time, the mixture was poured into aqueous 1M HCl aqueous solution (1 mL) and extracted with  $\text{CH}_2\text{Cl}_2$ . Organic layers were combined, dried over  $\text{Na}_2\text{SO}_4$ , concentrated, and purified by flash column chromatography (hexane/EtOAc) to give **2**. The ee was determined by chiral-phase HPLC. Racemic standards of the Michael Addition product were synthesized using racemic catalyst **F**.

##### Ethyl 2-(nitromethyl)-4-oxopentanoate (Compound **2a**)

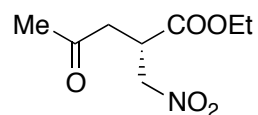

To a mixture of 1-((1*R*,2*R*)-2-aminocyclohexyl)-3-(3,5-bis(trifluoromethyl)phenyl)thiourea (catalyst **F**) (15.4 mg, 0.04 mmol) and acetic acid (1.8  $\mu\text{L}$ , 0.04 mmol) in  $\text{CH}_2\text{Cl}_2$  (0.2 mL), (*E*)-ethyl 4-oxopent-2-enoate (**1a**) (28.4 mg, 0.2 mmol) and nitromethane (54.2  $\mu\text{L}$ , 1.0 mmol) were added at 10 °C and the mixture (initially suspension) was stirred at the same temperature. The progress of the reaction was monitored by TLC. After 5 days, the mixture was poured into

aqueous 1M HCl solution (1.0 mL) and extracted with CH<sub>2</sub>Cl<sub>2</sub>. Organic layers were combined, dried over Na<sub>2</sub>SO<sub>4</sub>, concentrated, and purified by flash column chromatography (hexane/ EtOAc = 4:1) to afford **2** (30.9 mg, 76 %, 94 % ee).

Pale yellow oil. <sup>1</sup>H NMR (400 MHz, CDCl<sub>3</sub>): δ 4.74 (dd, *J* = 14.4 Hz, 6.0 Hz, 1H), 4.69 (dd, *J* = 14.4 Hz, 5.6 Hz, 1H), 4.23-4.15 (m, 2H), 3.57-3.49 (m, 1H), 3.04 (dd, *J* = 18.6 Hz, 5.6 Hz, 1H), 2.81 (dd, *J* = 18.6 Hz, 6.6 Hz, 1H), 2.20 (s, 3H), 1.25 (t, *J* = 7.1 Hz, 3H). <sup>13</sup>C NMR (100 MHz, CDCl<sub>3</sub>): δ 204.9, 170.5, 61.9, 41.4, 38.2, 29.9, 13.9. ESI-HRMS: calcd for C<sub>8</sub>H<sub>14</sub>O<sub>5</sub>N ([M+H]<sup>+</sup>) 204.0872, found 204.0849. HPLC (Daicel Chiralpak IA, hexane/*i*-PrOH = 95/5, flow rate 0.5 mL/min, λ = 220 nm): *t*<sub>R</sub> (major enantiomer) = 27.0 min, *t*<sub>R</sub> (minor enantiomer) = 24.4 min.

**A 2 gram-scale synthesis of 2a.** A mixture of catalyst **F** (819.5 mg, 2.13 mmol), enone **1a** (2.14 g, 15.1 mmol), and nitromethane (4.0 mL, 75 mmol) in CH<sub>2</sub>Cl<sub>2</sub> (10 mL) was stirred at room temperature (24 °C). The progress of the reaction was monitored by TLC. After 4 days, the mixture was poured into aqueous 1M HCl solution (15 mL) and extracted with CH<sub>2</sub>Cl<sub>2</sub>. Organic layers were combined, dried over Na<sub>2</sub>SO<sub>4</sub>, concentrated, and purified by flash column chromatography (hexane/EtOAc = 4:1) to afford **2a** (2.1 g, 69%, 90% ee).

### Compound 2b

The dr was determined by <sup>1</sup>H NMR analysis before purification. The diastereomers (compounds **2b-1** and **2b-2**) were separately purified by flash column chromatography. Relative stereochemistries were tentatively assigned based on the NOESY experiments.

### Compound 2b-1

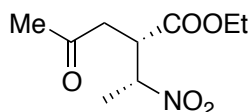

Rf 0.35 (hexane/EtOAc = 4:1). Pale yellow oil, 21.7 mg, 50%, 90% ee. <sup>1</sup>H NMR (400 MHz, CDCl<sub>3</sub>): δ 4.95 (qd, *J* = 8.9 Hz, 5.6 Hz, 1H), 4.26-4.13 (m, 2H), 3.44 (ddd, *J* = 9.4 Hz, 5.6 Hz, 3.6 Hz, 1H), 3.05 (dd, *J* = 17.9 Hz, 9.4 Hz, 1H), 2.53 (dd, *J* = 17.9 Hz, 3.6 Hz, 1H), 2.21 (s, 3H), 1.57 (d, *J* = 6.9 Hz, 3H), 1.27 (t, *J* = 7.2 Hz, 3H). <sup>13</sup>C NMR (100 MHz, CDCl<sub>3</sub>): δ 204.9, 170.6, 82.5, 61.8, 44.2, 40.5, 29.9, 16.8, 14.0. ESI-HRMS: calcd for C<sub>9</sub>H<sub>16</sub>O<sub>5</sub>N ([M+H]<sup>+</sup>) 218.1028, found 218.1004. HPLC (Daicel Chiralpak AS, hexane/*i*-PrOH = 95/5, flow rate 0.5 mL/min, λ = 220 nm): *t*<sub>R</sub> (major enantiomer) = 38.4 min, *t*<sub>R</sub> (minor enantiomer) = 44.8 min.

### Compound 2b-2

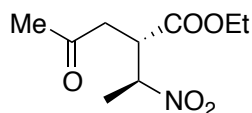

Rf 0.32 (hexane/EtOAc = 4:1). Pale yellow oil, 21.7 mg, 50%, 93% ee. <sup>1</sup>H NMR (400 MHz, CDCl<sub>3</sub>): δ 4.92 (qd, *J* = 6.8 Hz, 5.6 Hz, 1H), 4.18 (q, *J* = 7.2 Hz, 2H), 3.62 (ddd, *J* = 8.5 Hz, 5.6 Hz, 4.4 Hz, 1H), 3.01 (dd, *J* = 18.0 Hz, 8.5 Hz, 1H), 2.67 (dd, *J* = 18.0 Hz, 4.4 Hz, 1H), 2.21 (s, 3H), 1.55 (d, *J* = 6.8 Hz, 3H), 1.26 (t, *J* = 7.2 Hz, 3H). <sup>13</sup>C NMR (100 MHz, CDCl<sub>3</sub>): δ 204.8,

170.5, 82.0, 61.8, 43.6, 40.3, 30.0, 16.2, 14.0. ESI-HRMS: calcd for  $C_9H_{16}O_5N$  ( $[M+H]^+$ ) 218.1028, found 218.1004. HPLC (Daicel Chiralpak AS, hexane/*i*-PrOH = 75/25, flow rate 0.5 mL/min,  $\lambda = 220$  nm):  $t_R$  (major enantiomer) = 14.1 min,  $t_R$  (minor enantiomer) = 13.6 min.

### Compound 2c

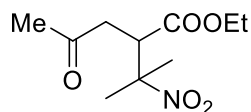

Pale yellow oil, 41.6 mg, 90%, 92% ee.  $^1H$  NMR (400 MHz,  $CDCl_3$ ):  $\delta$  4.17 (q,  $J = 7.1$  Hz, 2H), 3.66 (dd,  $J = 11.2$  Hz, 2.4 Hz, 1H), 3.04 (dd,  $J = 17.8$  Hz, 11.2 Hz, 1H), 2.41 (dd,  $J = 17.8$  Hz, 2.4 Hz, 1H), 2.17 (s, 3H), 1.63 (s, 3H), 1.59 (s, 3H), 1.27 (t,  $J = 7.1$  Hz, 3H).  $^{13}C$  NMR (100 MHz,  $CDCl_3$ ):  $\delta$  204.9, 170.8, 88.3, 61.6, 48.3, 41.4, 29.8, 25.5, 23.1, 14.0. ESI-HRMS: calcd for  $C_{10}H_{18}O_5N$  ( $[M+H]^+$ ) 232.1179, found 232.1173. HPLC (Daicel Chiralpak AS, hexane/*i*-PrOH = 97/3, flow rate 0.5 mL/min,  $\lambda = 220$  nm):  $t_R$  (major enantiomer) = 28.4 min,  $t_R$  (minor enantiomer) = 27.2 min.

### Compound 2d

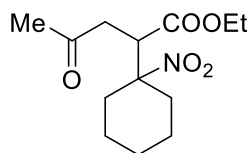

Pale yellow oil, 35.3 mg, 65%, 92% ee.  $^1H$  NMR (400 MHz,  $CDCl_3$ ):  $\delta$  4.17 (q,  $J = 7.1$  Hz, 2H), 3.30 (dd,  $J = 11.4$  Hz, 3.0 Hz, 1H), 3.04 (dd,  $J = 18.0$  Hz, 11.4 Hz, 1H), 2.57-2.42 (m, 3H), 2.15 (s, 3H), 1.77-1.52 (m, 4H), 1.46-1.12 (m, 4H), 1.28 (t,  $J = 7.1$  Hz, 3H).  $^{13}C$  NMR (100 MHz,  $CDCl_3$ ):  $\delta$  205.3, 170.6, 91.8, 61.5, 49.2, 40.9, 33.3, 31.4, 29.9, 24.4, 22.2, 22.1, 14.0. ESI-HRMS: calcd for  $C_{13}H_{22}O_5N$  ( $[M+H]^+$ ) 272.1498, found 272.1470. HPLC (Daicel Chiralpak IA, hexane/*i*-PrOH = 95/5, flow rate 0.5 mL/min,  $\lambda = 220$  nm):  $t_R$  (major enantiomer) = 20.1 min,  $t_R$  (minor enantiomer) = 17.9 min.

### Compound 2e

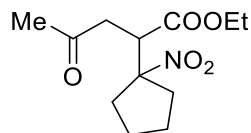

Pale yellow oil, 43.7 mg, 85%, 93% ee.  $^1H$  NMR (400 MHz,  $CDCl_3$ ):  $\delta$  4.21-4.12 (m, 2H), 3.56 (dd,  $J = 10.8$  Hz, 2.9 Hz, 1H), 3.07 (dd,  $J = 18.0$  Hz, 10.8 Hz, 1H), 2.70-2.60 (m, 1H), 2.58-2.49 (m, 1H), 2.50 (dd,  $J = 18.0$  Hz, 2.9 Hz, 1H), 2.17 (s, 3H), 2.12-2.00 (m, 1H), 1.96-1.84 (m, 1H), 1.80-1.64 (m, 4H), 1.26 (t,  $J = 7.1$  Hz, 3H).  $^{13}C$  NMR (100 MHz,  $CDCl_3$ ):  $\delta$  205.3, 170.7, 100.3, 61.5, 47.3, 42.1, 36.8, 35.3, 29.8, 24.0, 23.6, 14.0. ESI-HRMS: calcd for  $C_{12}H_{20}O_5N$  ( $[M+H]^+$ ) 258.1341, found 258.1319. HPLC (Daicel Chiralpak AS, hexane/*i*-PrOH = 98/2, flow rate 0.5 mL/min,  $\lambda = 220$  nm):  $t_R$  (major enantiomer) = 28.4 min,  $t_R$  (minor enantiomer) = 27.2 min.

### Compound 2f

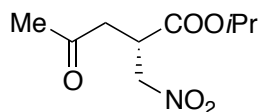

Pale yellow oil, 32.6 mg, 75%, 94% ee.  $^1\text{H}$  NMR (400 MHz,  $\text{CDCl}_3$ ):  $\delta$  5.05 (septet,  $J = 6.2$  Hz, 1H), 4.73 (dd,  $J = 14.4$  Hz, 5.6 Hz, 1H), 4.69 (dd,  $J = 14.4$  Hz, 5.6 Hz, 1H), 3.54-3.46 (m, 1H), 3.03 (dd,  $J = 18.5$  Hz, 5.6 Hz, 1H), 2.80 (dd,  $J = 18.5$  Hz, 6.6 Hz, 1H), 2.21 (s, 3H), 1.24 (d,  $J = 6.2$  Hz, 6H).  $^{13}\text{C}$  NMR (100 MHz,  $\text{CDCl}_3$ ):  $\delta$  204.9, 170.0, 74.8, 69.7, 41.4, 38.4, 29.9, 21.6, 21.5. ESI-HRMS: calcd for  $\text{C}_9\text{H}_{16}\text{O}_5\text{N}$  ( $[\text{M}+\text{H}]^+$ ) 218.1028, found 218.1004. HPLC (Daicel Chiralpak AS, hexane/*i*-PrOH = 95/5, flow rate 0.5 mL/min,  $\lambda = 220$  nm):  $t_R$  (major enantiomer) = 45.1 min,  $t_R$  (minor enantiomer) = 43.2 min.

### Compound 2g

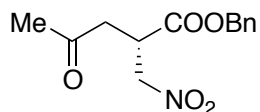

Pale yellow oil, 38.2 mg, 72%, 94% ee.  $^1\text{H}$  NMR (400 MHz,  $\text{CDCl}_3$ ):  $\delta$  7.73-7.28 (m, 5H), 5.16 (s, 2H), 4.80-4.67 (m, 2H), 3.64-3.55 (m, 1H), 3.03 (dd,  $J = 18.6$  Hz, 5.5 Hz, 1H), 2.82 (dd,  $J = 18.6$  Hz, 6.5 Hz, 1H), 2.17 (s, 3H).  $^{13}\text{C}$  NMR (100 MHz,  $\text{CDCl}_3$ ):  $\delta$  204.8, 170.4, 135.0, 128.7, 128.6, 128.3, 74.6, 67.6, 41.4, 38.3, 29.8. ESI-HRMS: calcd for  $\text{C}_{13}\text{H}_{16}\text{O}_5\text{N}$  ( $[\text{M}+\text{H}]^+$ ) 266.1028, found 266.1003. HPLC (Daicel Chiralpak AS, hexane/*i*-PrOH = 95/5, flow rate 0.5 mL/min,  $\lambda = 220$  nm):  $t_R$  (major enantiomer) = 44.8 min,  $t_R$  (minor enantiomer) = 39.0 min.

### Compound 2h

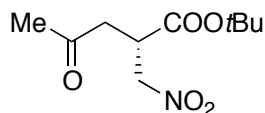

Pale yellow oil, 36.5 mg, 79%, 93% ee.  $^1\text{H}$  NMR (400 MHz,  $\text{CDCl}_3$ ):  $\delta$  4.69 (dd,  $J = 14.0$  Hz, 6.0 Hz, 1H), 4.65 (dd,  $J = 14.0$  Hz, 5.6 Hz, 1H), 3.49-3.41 (m, 1H), 2.99 (dd,  $J = 18.5$  Hz, 5.7 Hz, 1H), 2.76 (dd,  $J = 18.5$  Hz, 6.6 Hz, 1H), 2.20 (s, 3H), 1.44 (s, 9H).  $^{13}\text{C}$  NMR (100 MHz,  $\text{CDCl}_3$ ):  $\delta$  205.2, 169.5, 82.6, 74.9, 41.5, 39.0, 29.9, 27.8. ESI-HRMS: calcd for  $\text{C}_{10}\text{H}_{18}\text{O}_5\text{N}$  ( $[\text{M}+\text{H}]^+$ ) 232.1179, found 232.1173. HPLC (Daicel Chiralpak IA, hexane/*i*-PrOH = 99/1, flow rate 0.5 mL/min,  $\lambda = 220$  nm):  $t_R$  (major enantiomer) = 34.3 min,  $t_R$  (minor enantiomer) = 32.3 min.

### Compound 2i

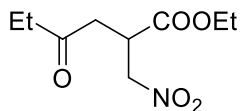

Pale yellow oil, 30.4 mg, 70%, 96% ee.  $^1\text{H}$  NMR (400 MHz,  $\text{CDCl}_3$ ):  $\delta$  4.75 (dd,  $J = 14.0$  Hz, 6.0 Hz, 1H), 4.70 (dd,  $J = 14.0$  Hz, 5.6 Hz, 1H), 4.25-4.15 (m, 2H), 3.60-3.51 (m, 1H), 3.00 (dd,  $J =$



18.3 Hz, 5.6 Hz, 1H), 2.77 (dd,  $J = 18.3$  Hz, 6.5 Hz, 1H), 2.57- 2.42 (m, 2H), 1.26 (t,  $J = 7.1$  Hz, 3H), 1.08 (t,  $J = 7.3$  Hz, 3H).  $^{13}\text{C}$  NMR (100 MHz,  $\text{CDCl}_3$ ):  $\delta$  207.9, 170.6, 74.8, 61.8, 40.1, 38.2, 36.0, 14.0, 7.6. ESI-HRMS: calcd for  $\text{C}_9\text{H}_{16}\text{O}_5\text{N}$  ( $[\text{M}+\text{H}]^+$ ) 218.1028, found 218.1004. HPLC (Daicel Chiralpak AS, hexane/*i*-PrOH = 95/5, flow rate 0.5 mL/min,  $\lambda = 220$  nm):  $t_{\text{R}}$  (major enantiomer) = 40.4 min,  $t_{\text{R}}$  (minor enantiomer) = 37.1 min.

### Compound 2j

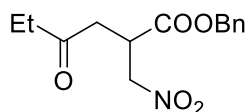

Pale yellow oil, 33.5 mg, 60%, 95% ee.  $^1\text{H}$  NMR (400 MHz,  $\text{CDCl}_3$ ):  $\delta$  7.46 (dd,  $J = 14.4$  Hz, 6.0 Hz, 1H), 4.72 (dd,  $J = 14.4$  Hz, 5.6 Hz, 1H), 5.16 (s, 2H), 4.82-4.68 (m, 2H), 3.67-3.57 (m, 1H), 3.00 (dd,  $J = 18.3$  Hz, 5.6 Hz, 1H), 2.78 (dd,  $J = 18.3$  Hz, 6.5 Hz, 1H), 2.51-2.36 (m, 2H), 1.05 (t,  $J = 7.3$  Hz, 3H).  $^{13}\text{C}$  NMR (100 MHz,  $\text{CDCl}_3$ ):  $\delta$  207.8, 170.5, 135.0, 128.7, 128.6, 128.3, 74.7, 67.6, 40.1, 38.2, 36.0, 7.6. ESI-HRMS: calcd for  $\text{C}_{14}\text{H}_{18}\text{O}_5\text{N}$  ( $[\text{M}+\text{H}]^+$ ) 280.1179, found 280.1173. HPLC (Daicel Chiralpak AS, hexane/*i*-PrOH = 95/5, flow rate 0.5 mL/min,  $\lambda = 220$  nm):  $t_{\text{R}}$  (major enantiomer) = 56.7 min,  $t_{\text{R}}$  (minor enantiomer) = 48.8 min.

### Compound 2k

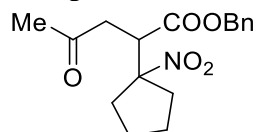

Colorless oil, 46.0 mg, 72%, 90% ee.  $^1\text{H}$  NMR (400 MHz,  $\text{CDCl}_3$ ):  $\delta$  7.42-7.29 (m, 5H), 5.16 (d,  $J = 12.2$  Hz, 1H), 5.12 (d,  $J = 12.2$  Hz, 1H), 3.63 (dd,  $J = 10.8$  Hz, 2.9 Hz, 1H), 3.09 (dd,  $J = 18.0$  Hz, 10.8 Hz, 1H), 2.69-2.58 (m, 1H), 2.56-2.43 (m, 2H), 2.14 (s, 3H), 2.09-1.97 (m, 1H), 1.93-1.81 (m, 1H), 1.78-1.50 (m, 4H).  $^{13}\text{C}$  NMR (100 MHz,  $\text{CDCl}_3$ ):  $\delta$  205.3, 170.6, 135.1, 128.6, 128.5, 128.4, 100.2, 67.4, 47.3, 42.1, 36.9, 35.2, 29.9, 24.0, 23.6. ESI-HRMS: calcd for  $\text{C}_{17}\text{H}_{22}\text{O}_5\text{N}$  ( $[\text{M}+\text{H}]^+$ ) 320.1492, found 320.1497. HPLC (Daicel Chiralpak AS, hexane/*i*-PrOH = 95/5, flow rate 0.5 mL/min,  $\lambda = 220$  nm):  $t_{\text{R}}$  (major enantiomer) = 23.3 min,  $t_{\text{R}}$  (minor enantiomer) = 28.3 min.

### Compound 2l

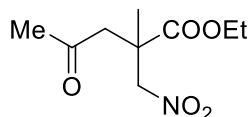

Reaction of (*E*)-ethyl 2-methyl-4-oxopent-2-enoate with nitromethane was performed according to the general procedure but in toluene at 45 °C. Pale yellow oil, 18.7 mg, 43 %.  $^1\text{H}$  NMR (400 MHz,  $\text{CDCl}_3$ ):  $\delta$  4.90 (d,  $J = 12.0$  Hz, 1H), 4.80 (d,  $J = 12.0$  Hz, 1H), 4.25-4.15 (m, 2H), 3.04 (d,  $J = 18.6$  Hz, 1H), 2.90 (d,  $J = 18.6$  Hz, 1H), 2.17 (s, 3H), 1.36 (s, 3H), 1.26 (t,  $J = 7.1$  Hz, 3H).  $^{13}\text{C}$  NMR (100 MHz,  $\text{CDCl}_3$ ):  $\delta$  205.6, 173.0, 79.2, 61.8, 47.3, 43.5, 30.3, 22.1, 13.9. ESI-HRMS: calcd for  $\text{C}_9\text{H}_{16}\text{O}_5\text{N}$  ( $[\text{M}+\text{H}]^+$ ) 218.1028, found 218.1004.

## Compound 2m

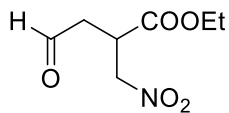

Reaction of (*E*)-ethyl 4-oxobut-2-enoate with nitromethane was performed according to the general procedure to afford **2**. Pale yellow oil, 17.8 mg, 47%. <sup>1</sup>H NMR (400 MHz, CDCl<sub>3</sub>): δ 9.78 (s, 1H), 4.77 (dd, *J* = 14.4 Hz, 6.1 Hz, 1H), 4.69 (dd, *J* = 14.4 Hz, 6.1 Hz, 1H), 4.22 (q, *J* = 7.1 Hz, 2H), 3.64-3.56 (m, 1H), 3.10 (dd, *J* = 19.1 Hz, 5.7 Hz, 1H), 2.88 (dd, *J* = 19.1 Hz, 5.7 Hz, 1H), 1.27 (t, *J* = 7.1 Hz, 3H). <sup>13</sup>C NMR (100 MHz, CDCl<sub>3</sub>): δ 197.9, 170.1, 74.4, 62.1, 42.0, 37.0, 14.0. ESI-HRMS: calcd for C<sub>7</sub>H<sub>12</sub>O<sub>5</sub>N ([M+H]<sup>+</sup>) 190.0710, found 190.0704.

## 5. Transformations of **2** to pyrrolidine-3-carboxylic acid and β<sup>2</sup>-amino acid derivatives

### Synthesis of (3*S*,5*R*)-5-methylpyrrolidine-3-carboxylic acid (**3**) via **2g** (Scheme 3)

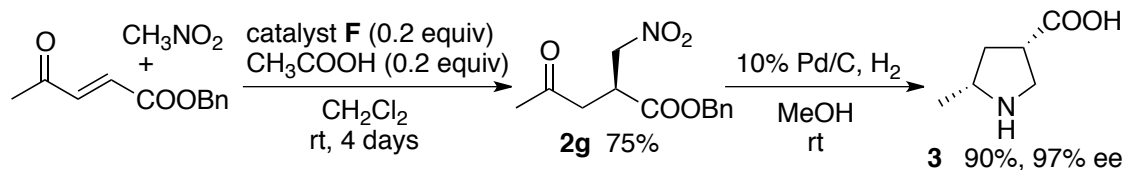

To a mixture of catalyst **F** (291.3 mg, 0.76 mmol) and acetic acid (40.0 μL, 0.70 mmol) in CH<sub>2</sub>Cl<sub>2</sub> (3.0 mL), (*E*)-benzyl 4-oxopent-2-enoate (902.5 mg, 4.42 mmol) and nitromethane (1.0 mL, 18 mmol) were added at room temperature (24 °C) and the mixture (initially suspension) was stirred at the same temperature for 4 days (the reaction progress was monitored by TLC). The mixture was poured into 1 M HCl aqueous solution (15 mL) and extracted with CH<sub>2</sub>Cl<sub>2</sub>. Organic layers were combined, dried over Na<sub>2</sub>SO<sub>4</sub>, concentrated, and purified by flash column chromatography (hexane/ EtOAc = 4:1) to afford product **2g** (879.5 mg, 75 %).

A mixture of compound **2g** (346.5 mg, 1.31 mmol) and 10% Pd on charcoal (258.2 mg) in anhydrous MeOH (10 mL) was stirred under H<sub>2</sub> (balloon) at room temperature (24 °C) for 2 days. The mixture was filtered through celite and the filtrate was concentrated to remove the solvent to give **3** (151 mg, 90%, 97% ee).

### (3*S*,5*R*)-5-Methylpyrrolidine-3-carboxylic acid (Compound **3**)

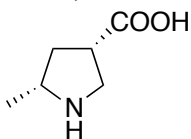

<sup>1</sup>H NMR (400 MHz, CD<sub>3</sub>OD): δ 3.68-3.58 (m, 1H), 3.54 (dd, *J* = 11.6 Hz, 7.2 Hz, 1H), 3.36 (dd, *J* = 11.6 Hz, 8.8 Hz, 1H), 3.11-3.02 (m, 1H), 2.47 (ddd, *J* = 13.4 Hz, 8.0 Hz, 6.8 Hz, 1H), 1.79 (ddd, *J* = 13.4 Hz, 10.0 Hz, 8.8 Hz, 1H), 1.41 (d, *J* = 6.4 Hz, 3H). <sup>13</sup>C NMR (100 MHz, CD<sub>3</sub>OD): δ 179.3, 57.7, 49.1, 46.4, 37.9, 17.5. HPLC (Daicel Chiralpak ZWIX (+), MeOH/MeCN/H<sub>2</sub>O = 49/49/2, flow rate 0.5 mL/min, ELSD): *t*<sub>R</sub> (major enantiomer) = 19.6 min, *t*<sub>R</sub> (minor enantiomer)

= 16.5 min.

NMR chemical shifts of compound **3** were altered in the presence of acids (see below).

### Transformations of **3a** to **4**

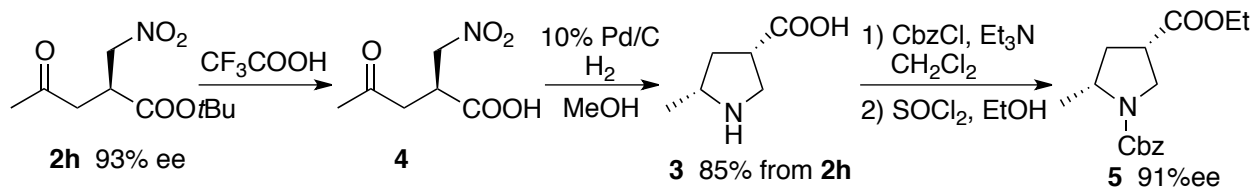

A mixture of compound **2h** (46.2 mg, 0.20 mmol, 93% ee) and trifluoroacetic acid (2 mL) was stirred for 1 hour at room temperature (24 °C). The mixture was concentrated under vacuum to afford compound **4**, which was directly used for the next step.

A mixture of compound **4**, 10% Pd on charcoal (21.8 mg) in anhydrous MeOH (5 mL) was stirred under H<sub>2</sub> (balloon) at room temperature (24 °C) for 2 days. The mixture was filtered through celite and the filtrate was concentrated under vacuum to afford compound **3** (21.9 mg, 85 % from **2h**).

To a mixture of compound **3** (21.9 mg) and triethylamine (57.2 μL, 0.40 mmol) in CH<sub>2</sub>Cl<sub>2</sub> (5 mL), benzyl chloroformate (42.3 μL, 0.30 mmol) was added dropwise over 30 min at room temperature (24 °C) and the mixture was stirred for 10 h at the same temperature. The mixture was diluted with CH<sub>2</sub>Cl<sub>2</sub> and washed with saturated aqueous solution of NaHCO<sub>3</sub> (5 mL). The organic phase was dried over anhydrous Na<sub>2</sub>SO<sub>4</sub>, concentrated, and purified by flash column chromatography (hexane/EtOAc = 2:1) to afford the Cbz-protected product. This was dissolved in anhydrous EtOH (2 mL). To this solution, thionyl chloride (21.8 μL, 0.30 mmol) was added at room temperature (24 °C) and the mixture was stirred for 16 h at the same temperature. The mixture was concentrated and diluted with CH<sub>2</sub>Cl<sub>2</sub>. The mixture was washed with saturated aqueous NaHCO<sub>3</sub>. The organic phase was dried over anhydrous Na<sub>2</sub>SO<sub>4</sub>, concentrated, and purified by flash column chromatography (hexane/EtOAc = 4:1) to afford compound **5**.

### Compound **4**

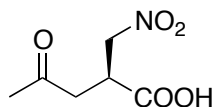

Pale yellow oil, 35 mg, 99%. <sup>1</sup>H NMR (400 MHz, CDCl<sub>3</sub>): δ 4.77 (dd, *J* = 14.6 Hz, 5.8 Hz, 1H), 4.70 (dd, *J* = 14.6 Hz, 5.5 Hz, 1H), 3.66-3.56 (m, 1H), 3.06 (dd, *J* = 18.6 Hz, 4.6 Hz, 1H), 2.86 (dd, *J* = 18.6 Hz, 6.4 Hz, 1H), 2.22 (s, 3H). <sup>13</sup>C NMR (100 MHz, CDCl<sub>3</sub>): δ 205.1, 175.8, 74.2, 41.2, 37.8, 27.8. ESI-HRMS: calcd for C<sub>6</sub>H<sub>10</sub>O<sub>5</sub>N ([M+H]<sup>+</sup>) 176.0553, found 176.0583.

### (3*S*,5*R*)-5-Methylpyrrolidine-3-carboxylic acid (Compound 3) obtained from 2h

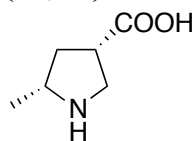

Colorless solid, 21.9 mg, 85% for two steps from **2h**.  $[\alpha]_D^{20} +9.6$  (c 0.52, MeOH, 91% ee). Lit.  $[\alpha]_D^{25} +10.3$  (c 0.58, MeOH).<sup>9</sup> Compound **3** obtained from compound **2h** possibly included trace CF<sub>3</sub>COOH. <sup>1</sup>H NMR (400 MHz, CD<sub>3</sub>OD):  $\delta$  3.78-3.70 (m, 1H), 3.62 (dd,  $J = 12.0$  Hz, 6.8 Hz, 1H), 3.50 (dd,  $J = 12.0$  Hz, 9.2 Hz, 1H), 3.41-3.32 (m, 1H), 2.61-2.53 (m, 1H), 1.89-1.80 (m, 1H), 1.44 (d,  $J = 6.4$  Hz, 3H). <sup>13</sup>C NMR (100 MHz, CD<sub>3</sub>OD):  $\delta$  182.8, 57.1, 51.2, 48.6, 40.1, 19.3.

### Compound 5

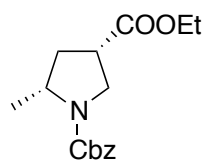

Colorless oil. <sup>1</sup>H NMR (400 MHz, CDCl<sub>3</sub>):  $\delta$  7.49-7.28 (m, 5H), 5.24-5.03 (m, 2H), 4.19-4.13 (m, 2H), 4.04-3.77 (m, 2H), 3.64-3.52 (m, 1H), 3.03-2.88 (m, 1H), 2.49-2.33 (m, 2H), 2.02-1.77 (m, 1H), 1.43-1.14 (m, 6H). <sup>13</sup>C NMR (100 MHz, CDCl<sub>3</sub>):  $\delta$  172.8, 154.5, 136.8, 128.5, 127.94, 127.91, 66.7, 61.0, 53.7, 53.0, 48.6, 48.2, 42.2, 41.8, 37.2, 36.6, 21.3, 20.3, 14.1. ESI-HRMS: calcd for C<sub>16</sub>H<sub>22</sub>O<sub>4</sub>N ([M+H]<sup>+</sup>) 292.1543, found 292.1544. HPLC (Daicel Chiralpak AS, hexane/*i*-PrOH = 95/5, flow rate 0.5 mL/min,  $\lambda = 254$  nm):  $t_R$  (major enantiomer) = 25.3 min,  $t_R$  (minor enantiomer) = 24.3 min.

### Transformation of 5 to 3

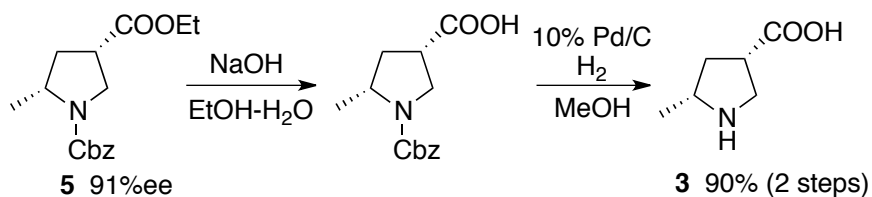

To a solution of compound **5** (91% ee, 29.1 mg, 0.10 mmol) in EtOH (1.0 mL)-H<sub>2</sub>O (1.0 mL), 1 M NaOH aqueous solution (0.15 mL) was added at room temperature and the mixture was stirred for 16 h. The mixture was poured into ice-1 M HCl (10 mL), and the mixture was extracted with CH<sub>2</sub>Cl<sub>2</sub>. The organic phase was dried over anhydrous Na<sub>2</sub>SO<sub>4</sub>, concentrated under vacuum. The residue was dissolved in MeOH (5 mL), and 10% Pd on charcoal (39.7 mg) was added. The mixture was stirred under H<sub>2</sub> (balloon) at room temperature (24 °C) for 2 days. The mixture was filtered through celite and the filtrate was concentrated under vacuum to afford compound **3** (11.6 mg, 90% yield for two steps from **5**).

### Transformation of **2a** to **5**

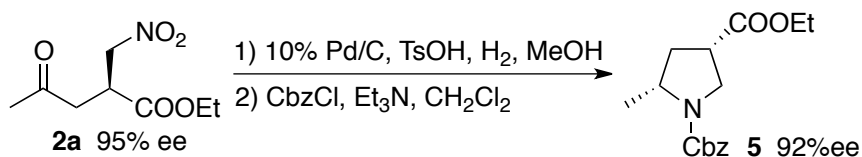

A mixture of compound **2a** (95% ee, 203 mg, 1.0 mmol) was dissolved in anhydrous MeOH (10 mL). To this solution, *p*-toluenesulfonic acid (187 mg, 1.0 mmol) and 10% Pd on charcoal (173 mg) were added and the mixture was stirred under H<sub>2</sub> (balloon) at room temperature (24 °C) for 2 days. The mixture was filtered through celite and the filtrate was concentrated under vacuum. The residue was dissolved in CH<sub>2</sub>Cl<sub>2</sub> (20 mL), and triethylamine (530 μL, 3.8 mmol) was added. To the mixture, benzyl chloroformate (270 μL, 1.92 mmol) was added dropwise over 30 min at room temperature (24 °C). The mixture was stirred at the same temperature for 10 h. The mixture was diluted with CH<sub>2</sub>Cl<sub>2</sub> and washed with saturated aqueous NaHCO<sub>3</sub> solution. The organic phase was dried over anhydrous Na<sub>2</sub>SO<sub>4</sub>, concentrated, and purified by flash column chromatography (hexane/EtOAc = 2:1) to give **5** (92% ee).

### Transformation of **2a** to **6**

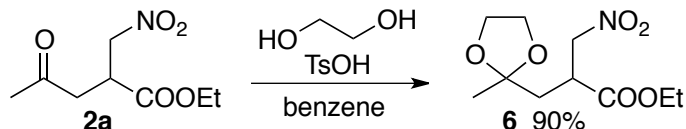

A mixture of **2a** (81.2 mg, 0.40 mmol), ethylene glycol (2 mL), and *p*-toluenesulfonic acid monohydrate (15.0 mg, 0.08 mmol) in benzene (10 mL) was heated at reflux with a Dean-Stark apparatus for 24 h. After being cooled to room temperature, the mixture was diluted with EtOAc, washed with saturated aqueous NaHCO<sub>3</sub>. The organic phase was dried over MgSO<sub>4</sub>, filtered, concentrated, and purified by flash column chromatography (hexane/EtOAc = 4:1) to give **6** (89.0 mg, 90%).

### Compound **6**

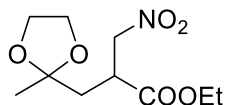

Colorless oil. <sup>1</sup>H NMR (400 MHz, CDCl<sub>3</sub>): δ 4.74 (dd, *J* = 14.4 Hz, 8.8 Hz, 1H), 4.66 (dd, *J* = 14.4 Hz, 4.6 Hz, 1H), 4.26-4.12 (m, 2H), 4.05-3.88 (m, 4H), 3.40-3.30 (m, 1H), 2.24 (dd, *J* = 14.8 Hz, 5.3 Hz, 1H), 1.94 (dd, *J* = 14.8 Hz, 7.4 Hz, 1H), 1.33 (s, 3H), 1.27 (t, *J* = 7.1 Hz, 3H). <sup>13</sup>C NMR (100 MHz, CDCl<sub>3</sub>): δ 172.2, 108.6, 75.4, 64.6, 64.4, 61.5, 38.9, 37.4, 24.0, 14.0. ESI-HRMS: calcd for C<sub>10</sub>H<sub>18</sub>O<sub>6</sub>N ([M+H]<sup>+</sup>) 248.1129, found 248.1099.

### Transformation of 2a to 8

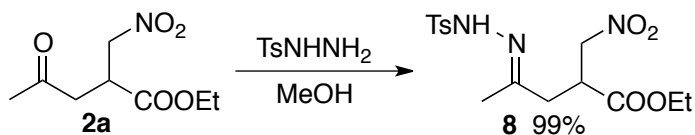

A solution of **2a** (46.7 mg, 0.23 mmol) and *p*-toluenesulfonyl hydrazide (42.8 mg, 0.23 mmol) in MeOH (2.3 mL) was refluxed for 2 h. After being cooled to room temperature, generated precipitate was collected by filtration and washed with hexane/EtOAc (10:1) to give **7** (99%, 85.4 mg, 99%).

### Compound 8

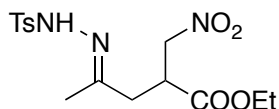

Colorless solid.  $^1\text{H NMR}$  (400 MHz,  $\text{CDCl}_3$ ):  $\delta$  7.80 (d,  $J = 8.1$  Hz, 2H), 7.33 (d,  $J = 8.1$  Hz, 2H), 4.52 (dd,  $J = 14.6$  Hz, 7.8 Hz, 1H), 4.32 (dd,  $J = 14.6$  Hz, 4.6 Hz, 1H), 4.23-4.05 (m, 2H), 3.53-3.43 (m, 1H), 2.71 (dd,  $J = 17.7$  Hz, 4.4 Hz, 1H), 2.52 (dd,  $J = 17.7$  Hz, 8.4 Hz, 1H), 2.44 (s, 3H), 1.81 (s, 3H), 1.22 (t,  $J = 7.2$  Hz, 3H).  $^{13}\text{C NMR}$  (100 MHz,  $\text{CDCl}_3$ ):  $\delta$  171.0, 153.2, 144.6, 134.9, 129.7, 128.1, 73.9, 61.7, 39.1, 36.4, 21.6, 16.5, 13.9. ESI-HRMS: calcd for  $\text{C}_{15}\text{H}_{22}\text{O}_6\text{N}_3\text{S}$  ( $[\text{M}+\text{H}]^+$ ) 372.1224, found 372.1230.

### Transformation of 2a to 9

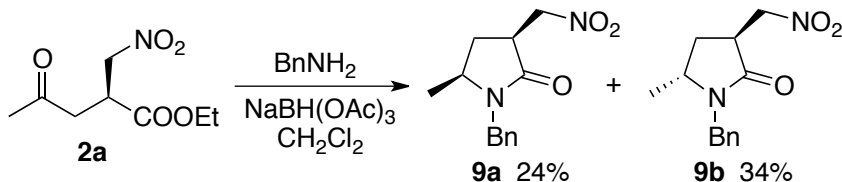

To a solution of **2a** (40.6 mg, 0.20 mmol) in  $\text{CH}_2\text{Cl}_2$  (1.5 mL), benzylamine (43.7  $\mu\text{L}$ , 0.40 mmol) and  $\text{NaBH}(\text{OAc})_3$  (85.4 mg, 0.40 mmol) were added at room temperature (24  $^\circ\text{C}$ ) and the mixture was stirred for 48 h at the same temperature. To the mixture, aqueous 1 N NaOH (1.5 mL) was added and the mixture was extracted with  $\text{CH}_2\text{Cl}_2$ . Organic layers were combined, washed with brine, dried over  $\text{Na}_2\text{SO}_4$ , filtered, concentrated, and purified by flash column chromatography (hexane/EtOAc = 4:1) to give **9a** (11.9 mg, 24%) and **9b** (16.9 mg, 34%). Relative stereochemistry was determined by NOESY experiments.

### Compound 9a

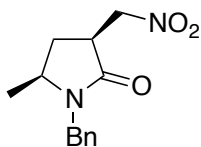

Rf 0.40 (hexane/EtOAc = 3:1), colorless oil.  $^1\text{H NMR}$  (400 MHz,  $\text{CDCl}_3$ ):  $\delta$  7.37-7.18 (m, 5H), 4.96 (d,  $J = 15.0$  Hz, 1H), 4.93 (dd,  $J = 13.8$  Hz, 3.8 Hz, 1H), 4.50 (dd,  $J = 13.8$  Hz, 9.2 Hz, 1H),

4.08 (d,  $J = 15.0$  Hz, 1H), 3.59-3.48 (m, 1H), 3.30-3.19 (m, 1H), 2.53 (ddd,  $J = 12.8$  Hz, 8.8 Hz, 6.6 Hz, 1H), 1.44 (ddd,  $J = 12.8$  Hz, 10.8 Hz, 8.9 Hz, 1H), 1.22 (d,  $J = 6.2$  Hz, 3H).  $^{13}\text{C}$  NMR (100 MHz,  $\text{CDCl}_3$ ):  $\delta$  171.8, 136.1, 128.8, 127.9, 127.7, 76.3, 51.1, 44.3, 40.8, 32.8, 19.9. ESI-HRMS: calcd for  $\text{C}_{13}\text{H}_{17}\text{O}_3\text{N}_2$  ( $[\text{M}+\text{H}]^+$ ) 249.1234, found 249.1227.

### Compound 9b

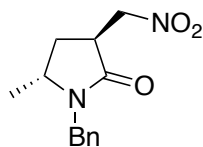

Rf 0.35 (hexane/EtOAc = 3:1), colorless oil.  $^1\text{H}$  NMR (400 MHz,  $\text{CDCl}_3$ ):  $\delta$  7.41-7.19 (m, 5H), 4.99 (d,  $J = 14.9$  Hz, 1H), 4.86 (dd,  $J = 13.8$  Hz, 3.8 Hz, 1H), 4.53 (dd,  $J = 13.8$  Hz, 8.8 Hz, 1H), 3.99 (d,  $J = 14.9$  Hz, 1H), 3.62-3.50 (m, 1H), 3.41-3.29 (m, 1H), 2.02 (dd,  $J = 8.8$  Hz, 5.8 Hz, 2H), 1.19 (d,  $J = 6.4$  Hz, 3H).  $^{13}\text{C}$  NMR (100 MHz,  $\text{CDCl}_3$ ):  $\delta$  171.0, 136.0, 128.8, 128.0, 127.8, 75.9, 50.8, 44.5, 39.3, 31.2, 19.0. ESI-HRMS: calcd for  $\text{C}_{13}\text{H}_{17}\text{O}_3\text{N}_2$  ( $[\text{M}+\text{H}]^+$ ) 249.1234, found 249.1227.

### Transformation 3e to 10

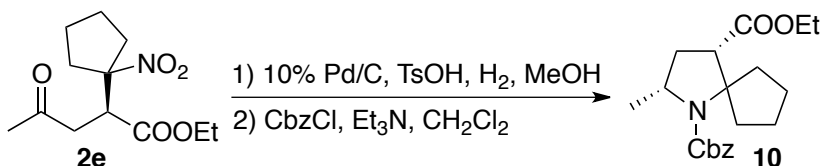

A mixture of compound **2a** (95% ee, 115.0 mg, 0.57 mmol) was dissolved in anhydrous MeOH (10 mL). To this solution, *p*-toluenesulfonic acid (91.4 mg, 0.53 mmol) and 10% Pd on charcoal (62.0 mg) were added and the mixture was stirred under  $\text{H}_2$  (balloon) at room temperature (24 °C) for 2 days. The mixture was filtered through celite and the filtrate was concentrated under vacuum. The residue was dissolved in  $\text{CH}_2\text{Cl}_2$  (20 mL), and triethylamine (226  $\mu\text{L}$ , 1.58 mmol) was added. To the mixture, benzyl chloroformate (270  $\mu\text{L}$ , 1.92 mmol) was added dropwise over 30 min at room temperature (24 °C). The mixture was stirred at the same temperature for 10 h. The mixture was diluted with  $\text{CH}_2\text{Cl}_2$  and washed with saturated aqueous  $\text{NaHCO}_3$  solution. The organic phase was dried over anhydrous  $\text{Na}_2\text{SO}_4$ , concentrated, and purified by flash column chromatography (hexane/EtOAc = 2:1) to give **10**.

### Compound 10

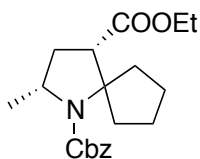

Colorless oil.  $^1\text{H}$  NMR (400 MHz,  $\text{CDCl}_3$ ):  $\delta$  7.45-7.28 (m, 5H), 5.23-5.05 (m, 2H), 4.26-4.06 (m, 2H), 3.93-3.82 (m, 1H), 2.86-2.71 (m, 1H), 2.27-2.12 (m, 1H), 2.03-1.10 (m, 12H), 1.27 (t,  $J =$

7.2 Hz, 3H).  $^{13}\text{C}$  NMR (100 MHz,  $\text{CDCl}_3$ ):  $\delta$  171.7, 153.8, 136.7, 128.4, 128.1, 128.0, 73.4, 66.4, 60.7, 54.2, 53.3, 35.9, 35.4, 34.4, 29.7, 26.9, 25.5, 24.0, 22.6, 14.1. ESI-HRMS: calcd for  $\text{C}_{20}\text{H}_{28}\text{O}_4\text{N}$  ( $[\text{M}+\text{H}]^+$ ) 346.2013, found 346.2016.

## 6. References

- (1) H.-L. Cui, F. Tanaka, *Chem. Eur. J.* **2013**, *19*, 6213.
- (2) X. Zhao, K. E. Ruhl, T. Rovis, *Angew. Chem. Int. Ed.* **2012**, *51*, 12330.
- (3) A. Takahashi, H. Yanai, M. Zhang, T. Sonoda, M. Mishima, T. Taguchi, *J. Org. Chem.*, **2010**, *75*, 1259.
- (4) J. Wang, A. Ma, D. Ma, *Org. Lett.*, **2008**, *10*, 5425.
- (5) M. Ronsheim, C. Zercher, *J. Org. Chem.*, **2003**, *68*, 4535.
- (6) W. Baratta, A. Zotto, *Chem. Comm.* **1997**, *22*, 2163.
- (7) D. Lyzwa, K. Dudzinski, P. Kwiatkowski, *Org. Lett.*, **2012**, *14*, 1540.
- (8) K. Dudzinski, A. Pakulska, P. Kwiatkowski, *Org. Lett.*, **2012**, *14*, 4222.
- (9) H. Zhang, M. Mifsud, F. Tanaka, C. F. Barbas, III, *J. Am. Chem. Soc.* **2006**, *128*, 9630.



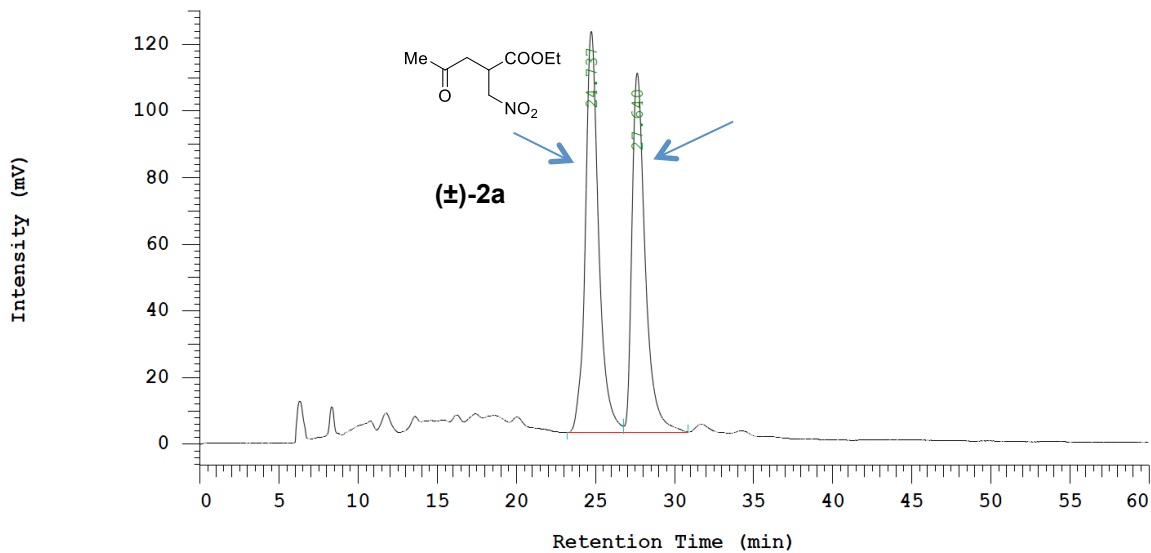

| No. | RT     | Area     | Conc 1  |
|-----|--------|----------|---------|
| 1   | 24.737 | 6973274  | 52.940  |
| 2   | 27.640 | 6198704  | 47.060  |
|     |        | 13171978 | 100.000 |

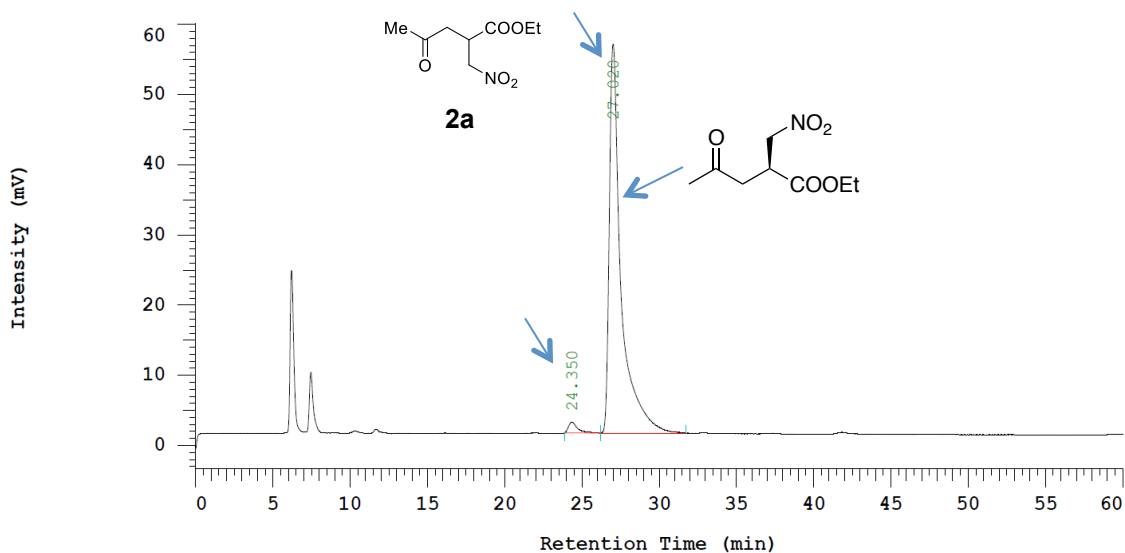

| No. | RT     | Area    | Conc 1  |
|-----|--------|---------|---------|
| 1   | 24.350 | 62894   | 2.136   |
| 2   | 27.020 | 2880925 | 97.864  |
|     |        | 2943819 | 100.000 |

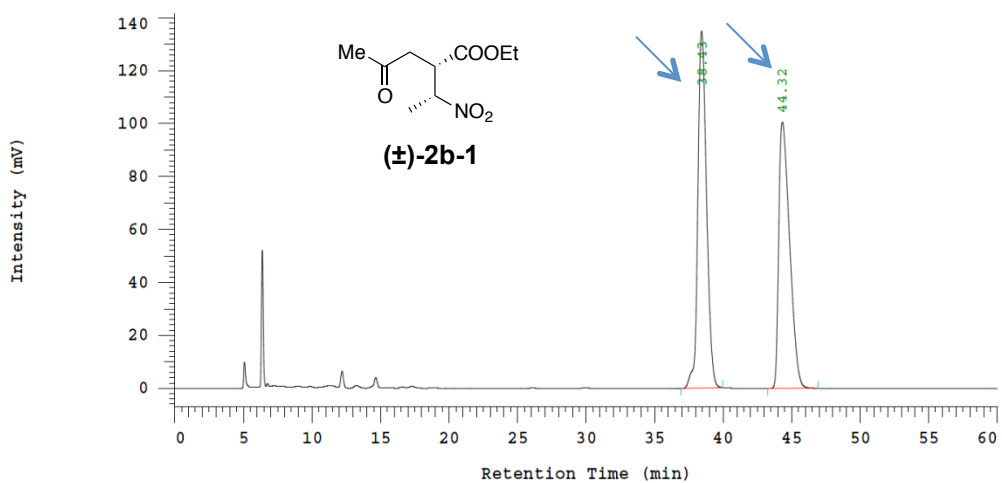

| No. | RT    | Area     | Area %  |
|-----|-------|----------|---------|
| 1   | 38.43 | 5838327  | 51.722  |
| 2   | 44.32 | 5449663  | 48.278  |
|     |       | 11287990 | 100.000 |

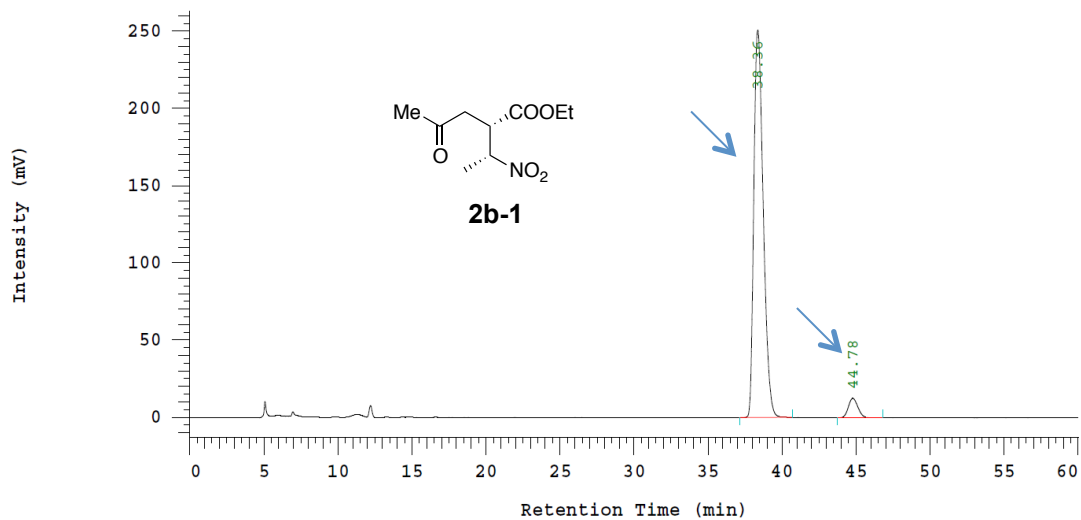

| No. | RT    | Area     | Area %  |
|-----|-------|----------|---------|
| 1   | 38.36 | 10875166 | 95.192  |
| 2   | 44.78 | 549296   | 4.808   |
|     |       | 11424462 | 100.000 |

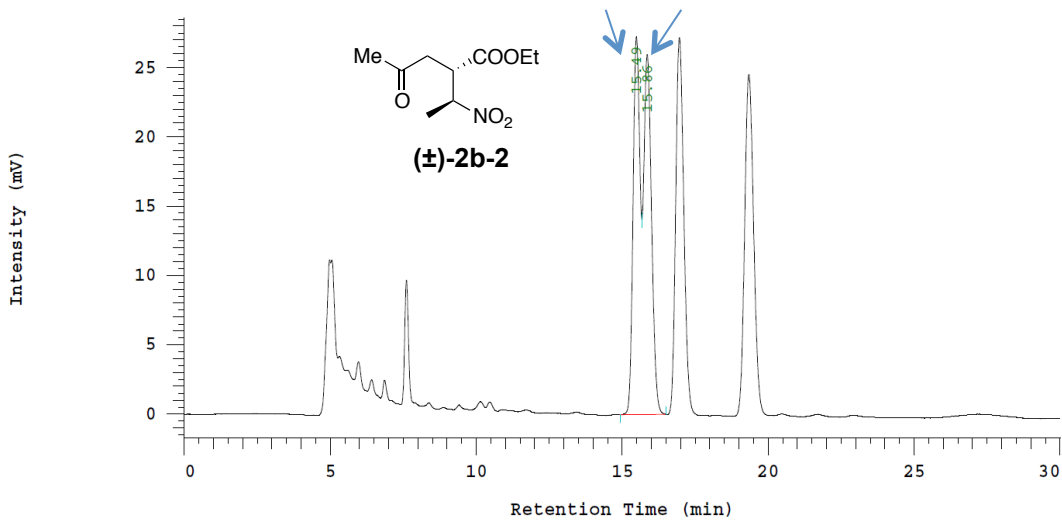

| No. | RT    | Area   | Area %  |
|-----|-------|--------|---------|
| 1   | 15.49 | 445592 | 47.649  |
| 2   | 15.86 | 489562 | 52.351  |
|     |       | 935154 | 100.000 |

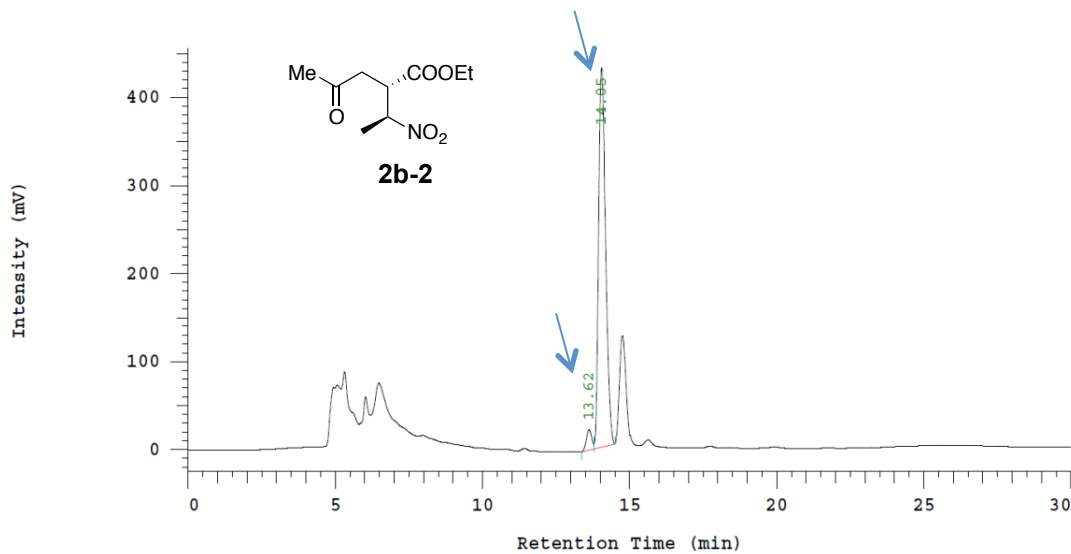

| No. | RT    | Area    | Area %  |
|-----|-------|---------|---------|
| 1   | 13.62 | 281303  | 3.764   |
| 2   | 14.05 | 7192135 | 96.236  |
|     |       | 7473438 | 100.000 |

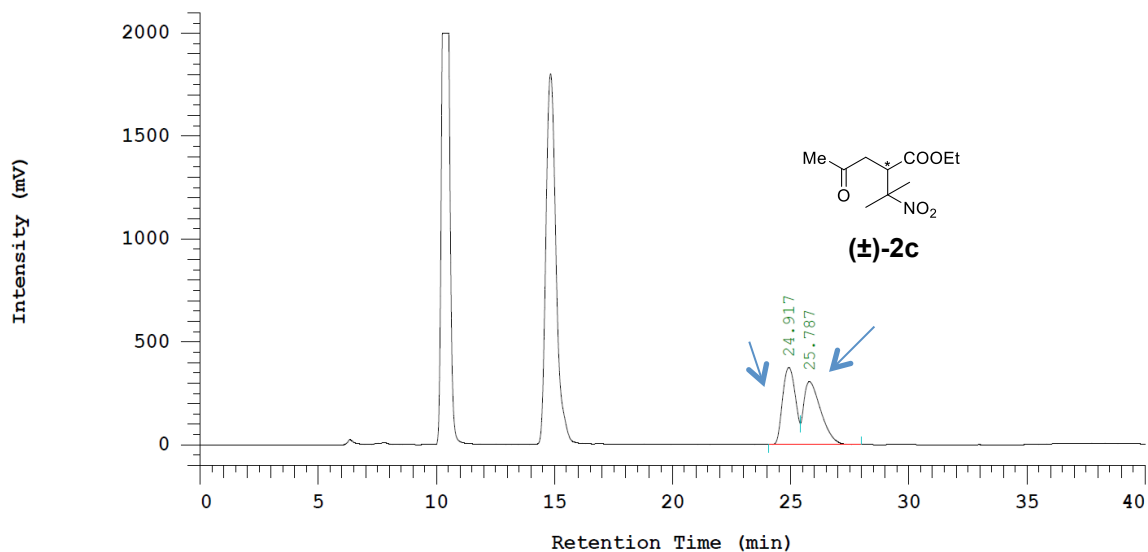

| No. | RT     | Area     | Area %  |
|-----|--------|----------|---------|
| 1   | 24.917 | 13988504 | 47.609  |
| 2   | 25.787 | 15393615 | 52.391  |
|     |        | 29382119 | 100.000 |

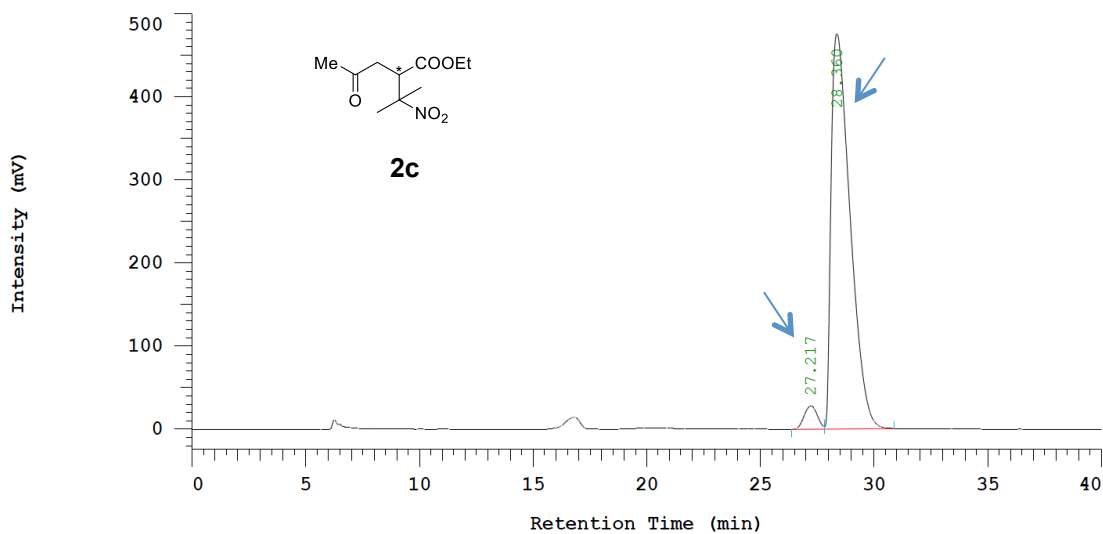

| No. | RT     | Area     | Area %  |
|-----|--------|----------|---------|
| 1   | 27.217 | 1121048  | 3.945   |
| 2   | 28.360 | 27293166 | 96.055  |
|     |        | 28414214 | 100.000 |

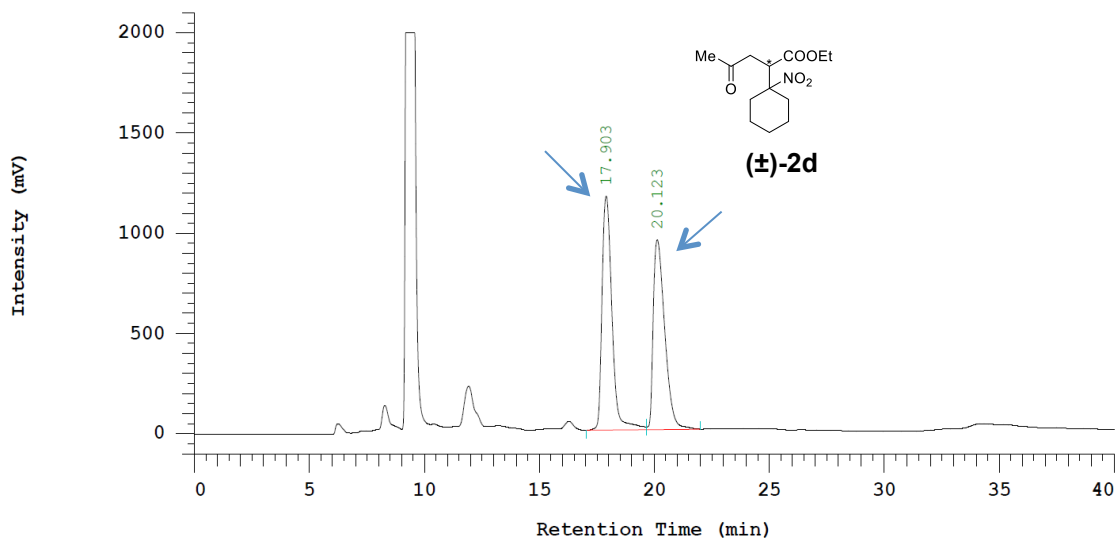

| No. | RT     | Area     | Area %  |
|-----|--------|----------|---------|
| 1   | 17.903 | 34568243 | 51.632  |
| 2   | 20.123 | 32382927 | 48.368  |
|     |        | 66951170 | 100.000 |

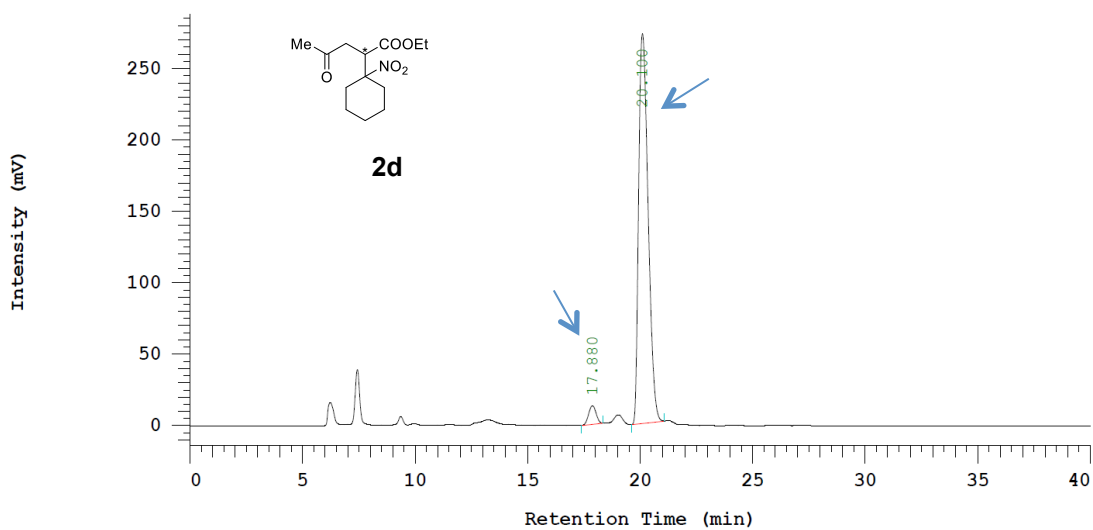

| No. | RT     | Area    | Area %  |
|-----|--------|---------|---------|
| 1   | 17.880 | 294323  | 3.629   |
| 2   | 20.100 | 7815468 | 96.371  |
|     |        | 8109791 | 100.000 |

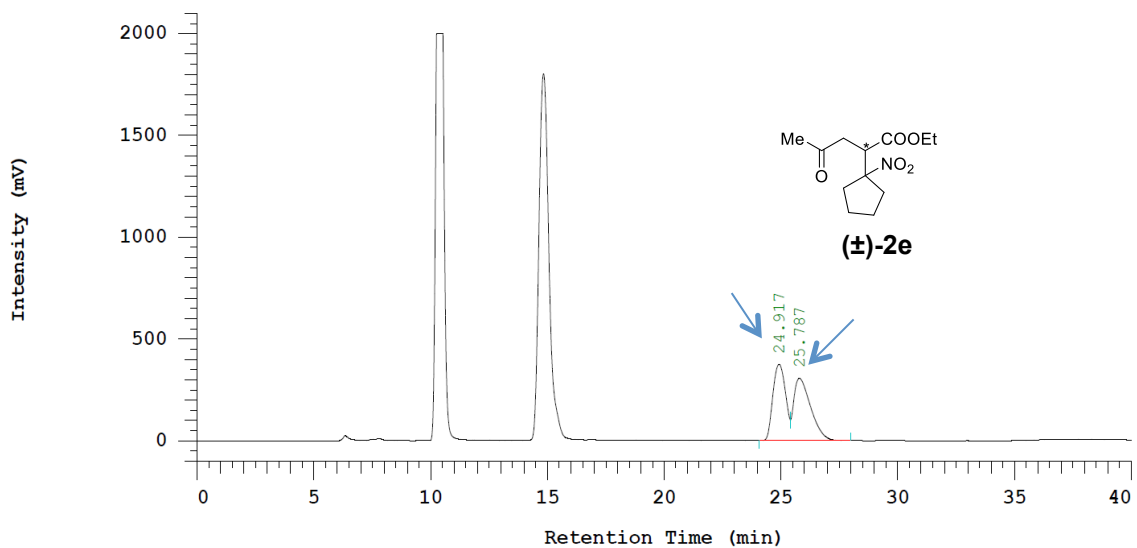

| No. | RT     | Area     | Area %  |
|-----|--------|----------|---------|
| 1   | 24.917 | 13988504 | 47.609  |
| 2   | 25.787 | 15393615 | 52.391  |
|     |        | 29382119 | 100.000 |

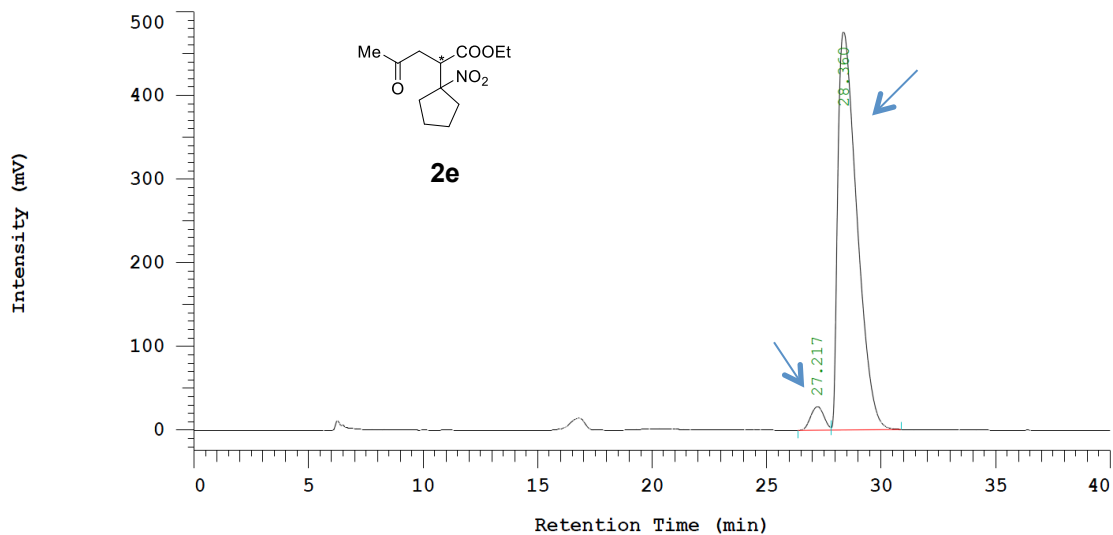

| No. | RT     | Area     | Area %  |
|-----|--------|----------|---------|
| 1   | 27.217 | 1121048  | 3.945   |
| 2   | 28.360 | 27293166 | 96.055  |
|     |        | 28414214 | 100.000 |

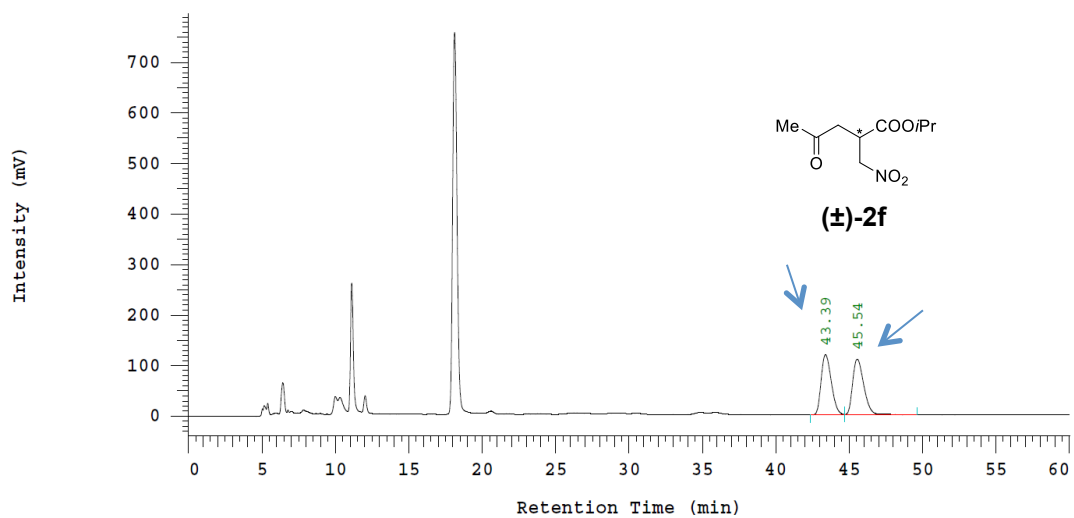

| No. | RT    | Area     | Area %  |
|-----|-------|----------|---------|
| 1   | 43.39 | 5698826  | 49.226  |
| 2   | 45.54 | 5877934  | 50.774  |
|     |       | 11576760 | 100.000 |

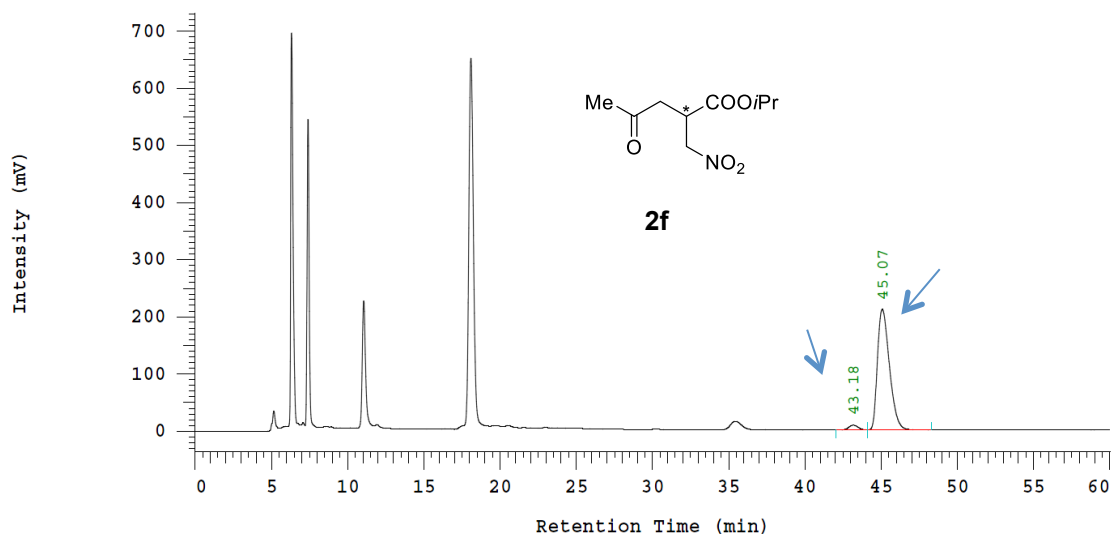

| No. | RT    | Area     | Area %  |
|-----|-------|----------|---------|
| 1   | 43.18 | 368983   | 3.149   |
| 2   | 45.07 | 11346951 | 96.851  |
|     |       | 11715934 | 100.000 |

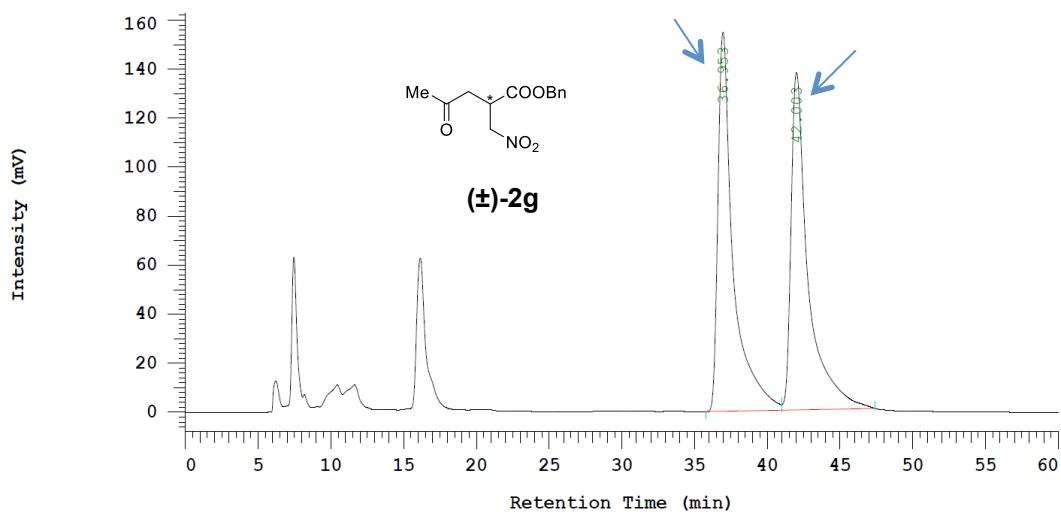

| No. | RT     | Area     | Area %  |
|-----|--------|----------|---------|
| 1   | 36.953 | 11153224 | 50.075  |
| 2   | 42.003 | 11119668 | 49.925  |
|     |        | 22272892 | 100.000 |

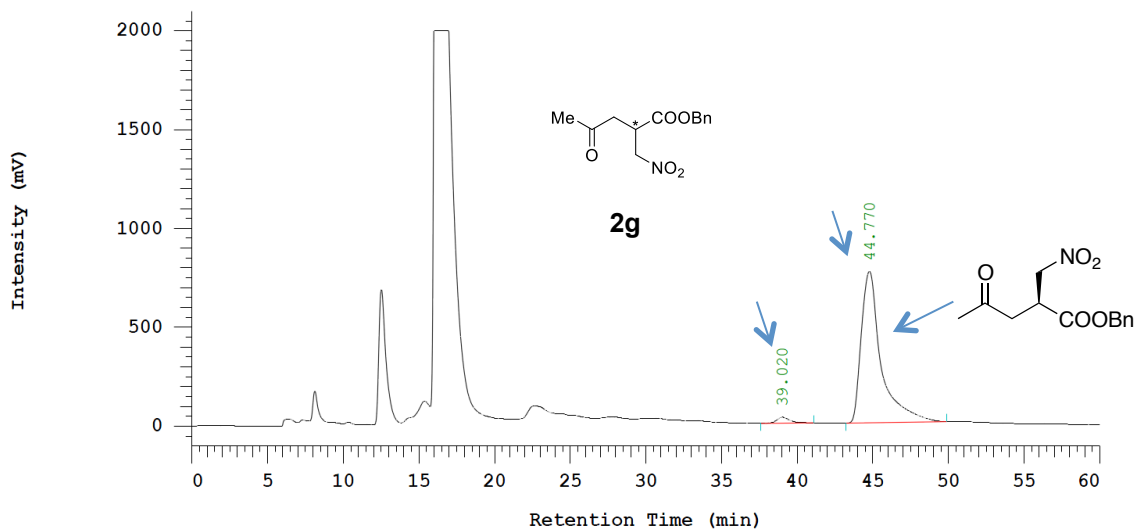

| No. | RT     | Area     | Area %  |
|-----|--------|----------|---------|
| 1   | 39.020 | 1877029  | 2.639   |
| 2   | 44.770 | 69244641 | 97.361  |
|     |        | 71121670 | 100.000 |



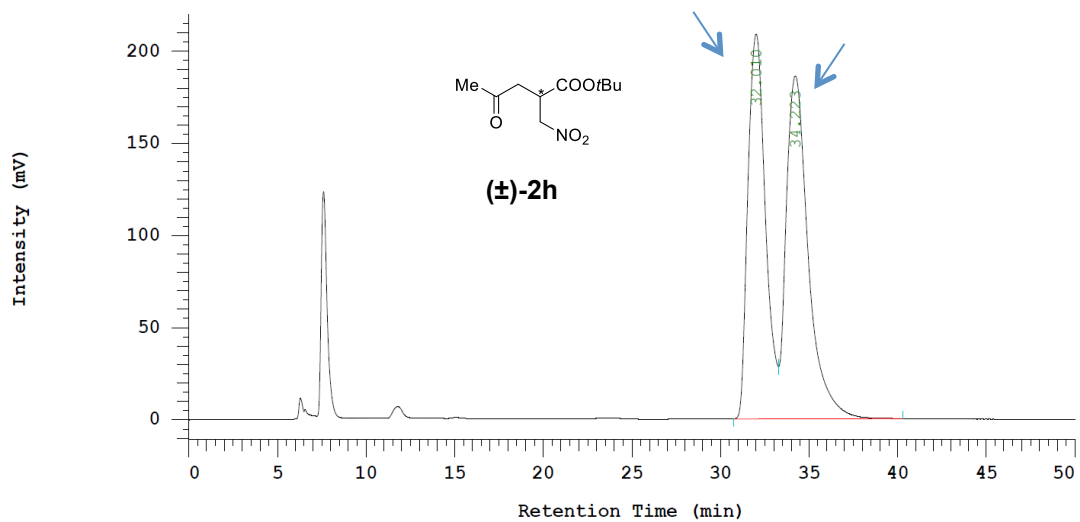

| No. | RT     | Area     | Conc 1  |
|-----|--------|----------|---------|
| 1   | 32.010 | 14192065 | 46.907  |
| 2   | 34.223 | 16063822 | 53.093  |
|     |        |          | 100.000 |

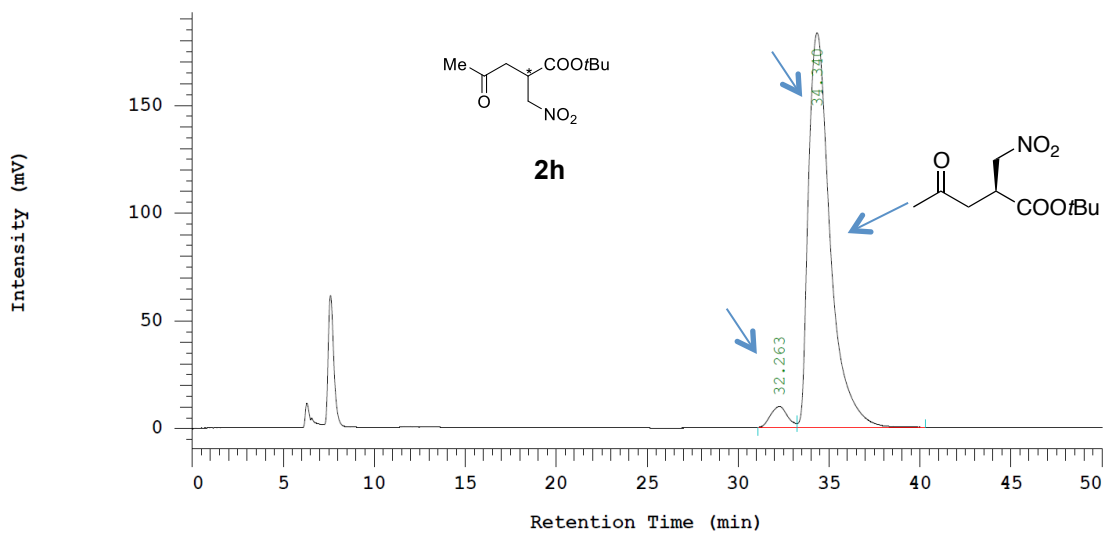

| No. | RT     | Area     | Conc 1  |
|-----|--------|----------|---------|
| 1   | 32.263 | 615320   | 3.927   |
| 2   | 34.340 | 15054443 | 96.073  |
|     |        |          | 100.000 |

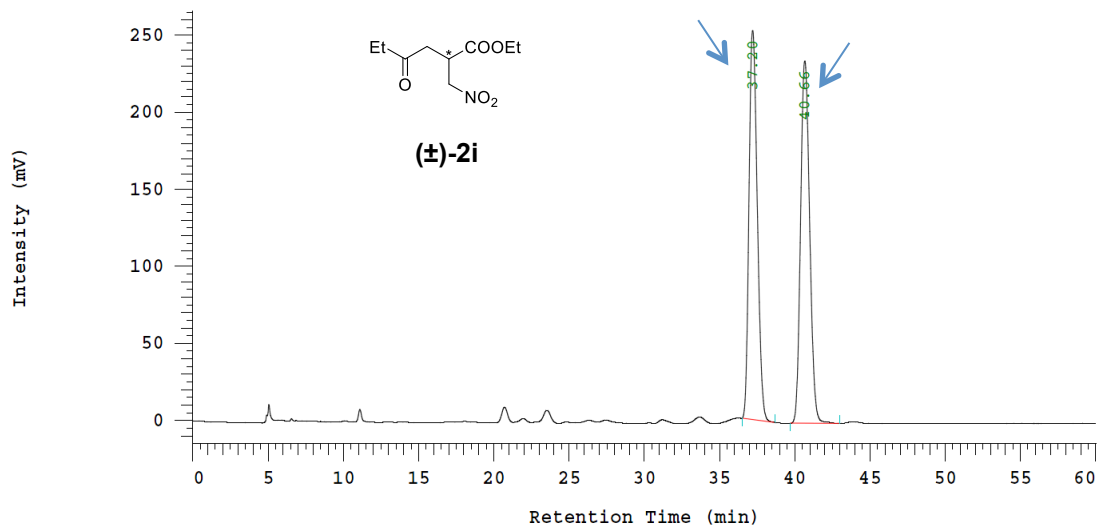

| No. | RT    | Area     | Area %  |
|-----|-------|----------|---------|
| 1   | 37.20 | 9417005  | 49.381  |
| 2   | 40.66 | 9653273  | 50.619  |
|     |       | 19070278 | 100.000 |

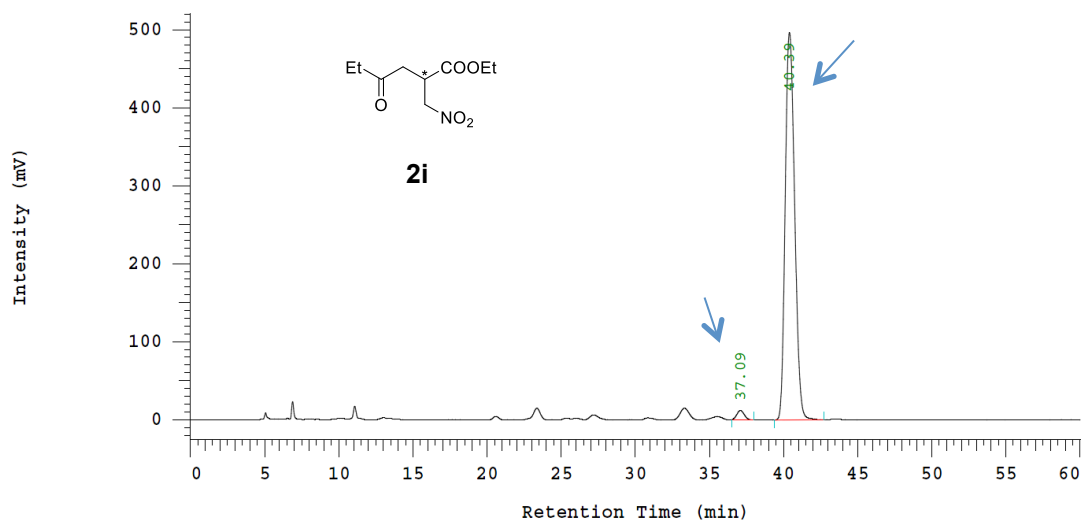

| No. | RT    | Area     | Area %  |
|-----|-------|----------|---------|
| 1   | 37.09 | 405314   | 1.850   |
| 2   | 40.39 | 21504186 | 98.150  |
|     |       | 21909500 | 100.000 |

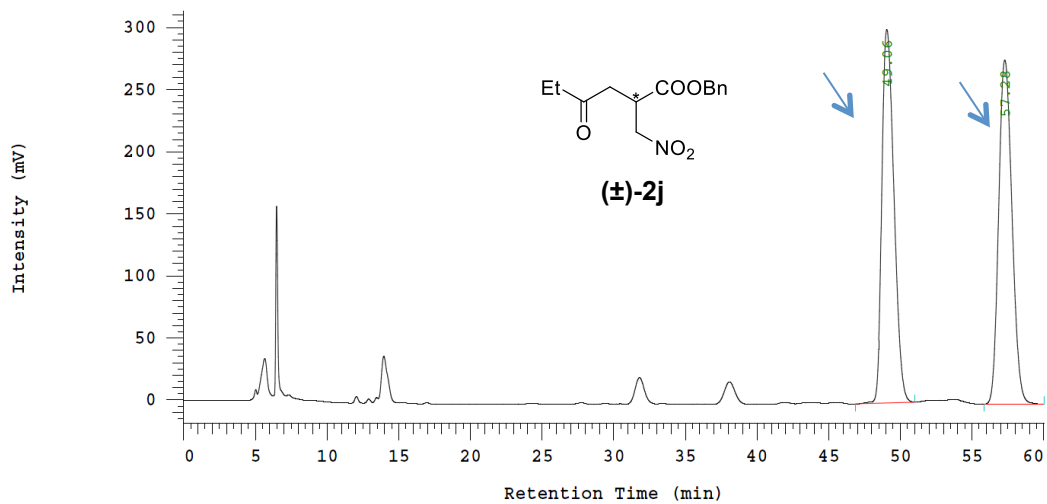

| No. | RT    | Area     | Area %  |
|-----|-------|----------|---------|
| 1   | 49.06 | 17447831 | 49.754  |
| 2   | 57.28 | 17620460 | 50.246  |
|     |       | 35068291 | 100.000 |

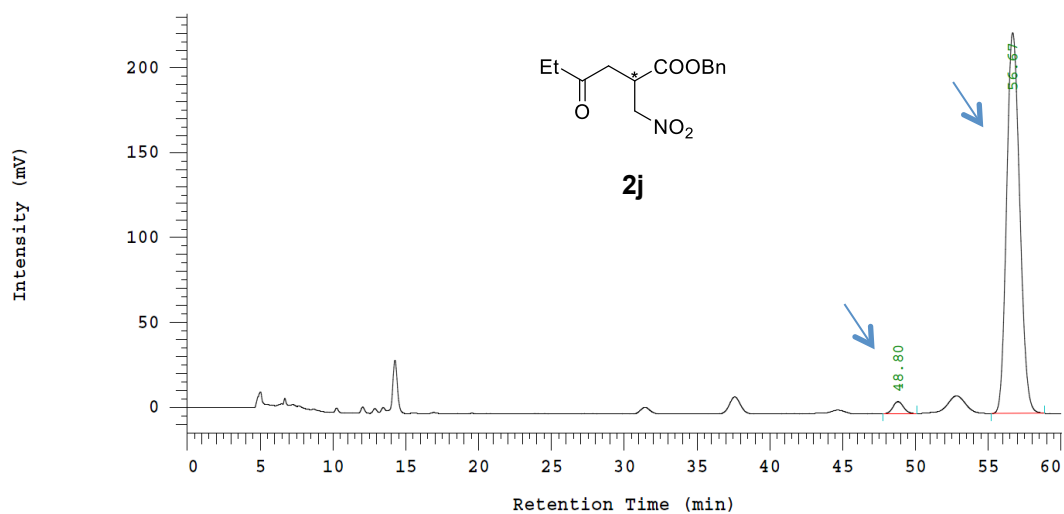

| No. | RT    | Area     | Area %  |
|-----|-------|----------|---------|
| 1   | 48.80 | 342088   | 2.416   |
| 2   | 56.67 | 13816323 | 97.584  |
|     |       | 14158411 | 100.000 |

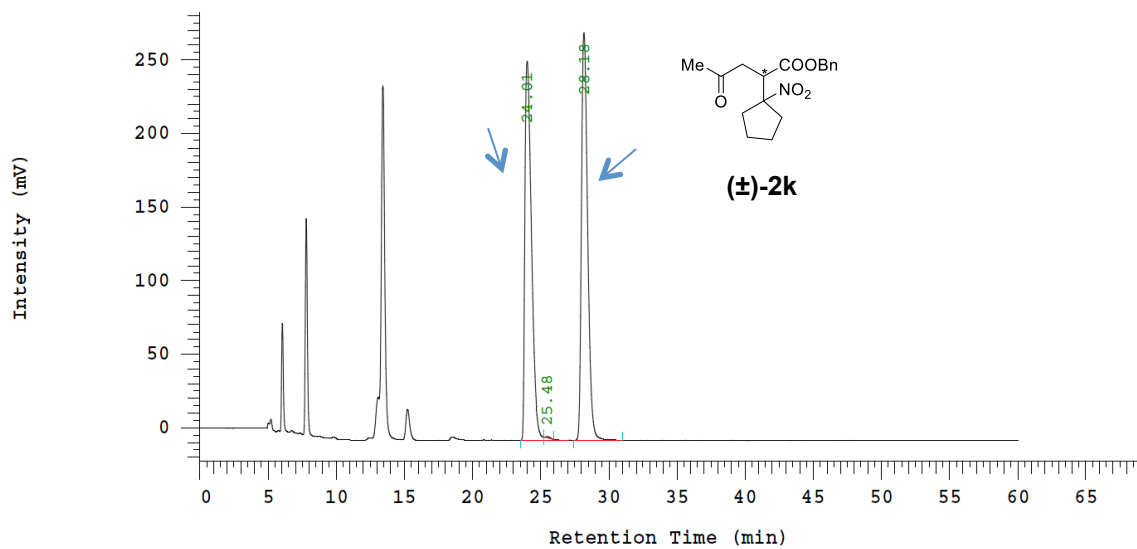

| No. | RT    | Area     | Area %  |
|-----|-------|----------|---------|
| 1   | 24.01 | 8512579  | 50.140  |
| 2   | 25.48 | 18573    | 0.109   |
| 3   | 28.18 | 8446382  | 49.750  |
|     |       | 16977534 | 100.000 |

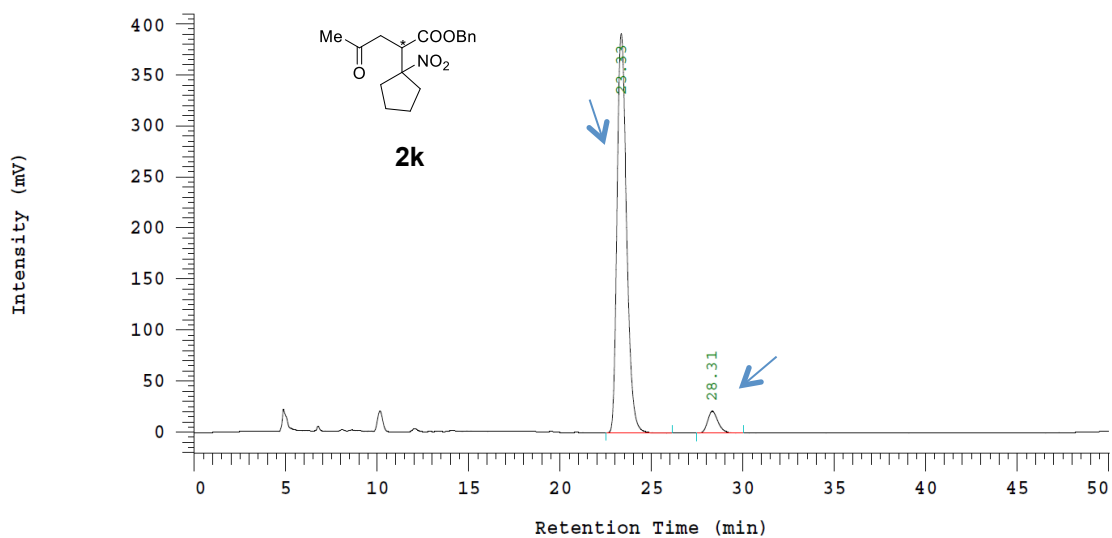

| No. | RT    | Area     | Area %  |
|-----|-------|----------|---------|
| 1   | 23.33 | 14204346 | 94.443  |
| 2   | 28.31 | 835817   | 5.557   |
|     |       | 15040163 | 100.000 |

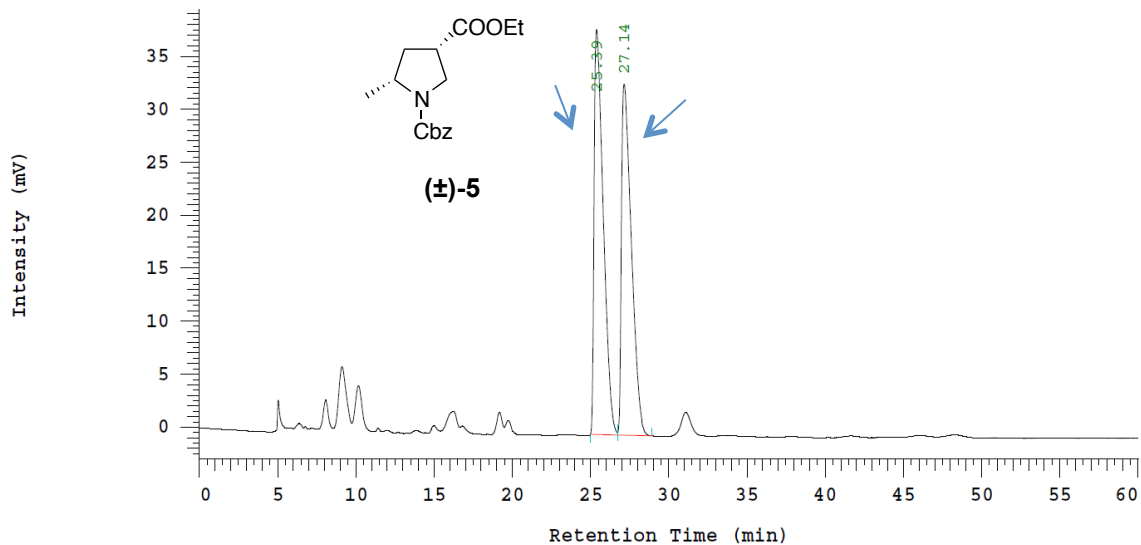

| No. | RT    | Area    | Area %  |
|-----|-------|---------|---------|
| 1   | 25.39 | 1522841 | 51.457  |
| 2   | 27.14 | 1436588 | 48.543  |
|     |       | 2959429 | 100.000 |

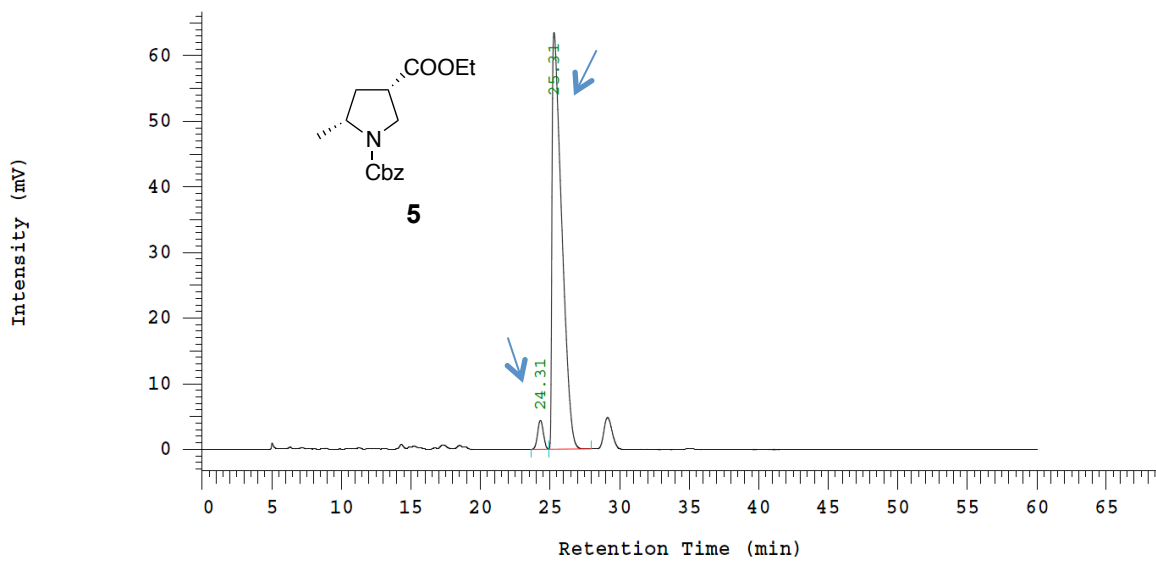

| No. | RT    | Area    | Area %  |
|-----|-------|---------|---------|
| 1   | 24.31 | 123294  | 3.945   |
| 2   | 25.31 | 3002352 | 96.055  |
|     |       | 3125646 | 100.000 |

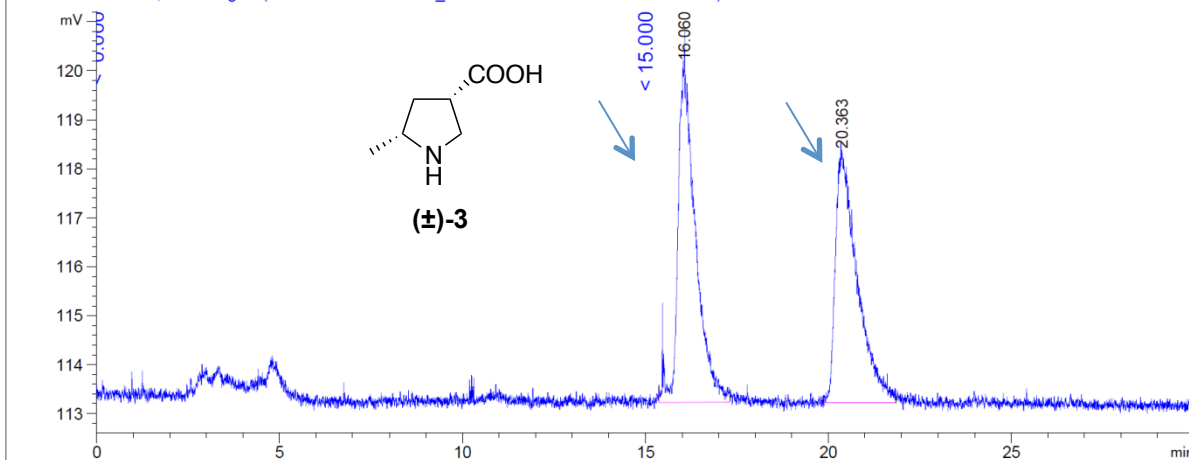

| Peak # | RetTime [min] | Type | Width [min] | Area [mV*s] | Height [mV] | Area %  |
|--------|---------------|------|-------------|-------------|-------------|---------|
| 1      | 16.060        | BB   | 0.4718      | 233.04874   | 6.93982     | 52.3282 |
| 2      | 20.363        | BB   | 0.6059      | 212.31113   | 5.09763     | 47.6718 |

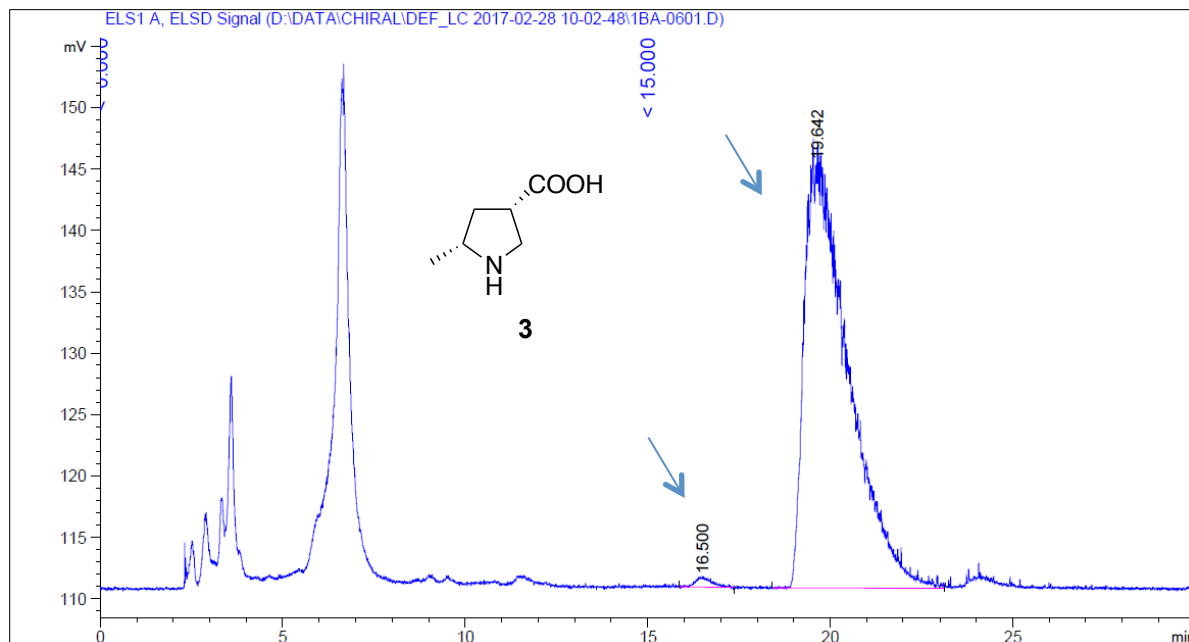

| Peak # | RetTime [min] | Type | Width [min] | Area [mV*s] | Height [mV] | Area %  |
|--------|---------------|------|-------------|-------------|-------------|---------|
| 1      | 16.500        | BB   | 0.5274      | 25.88804    | 7.56224e-1  | 0.8698  |
| 2      | 19.642        | BB   | 1.2513      | 2950.44043  | 34.58559    | 99.1302 |

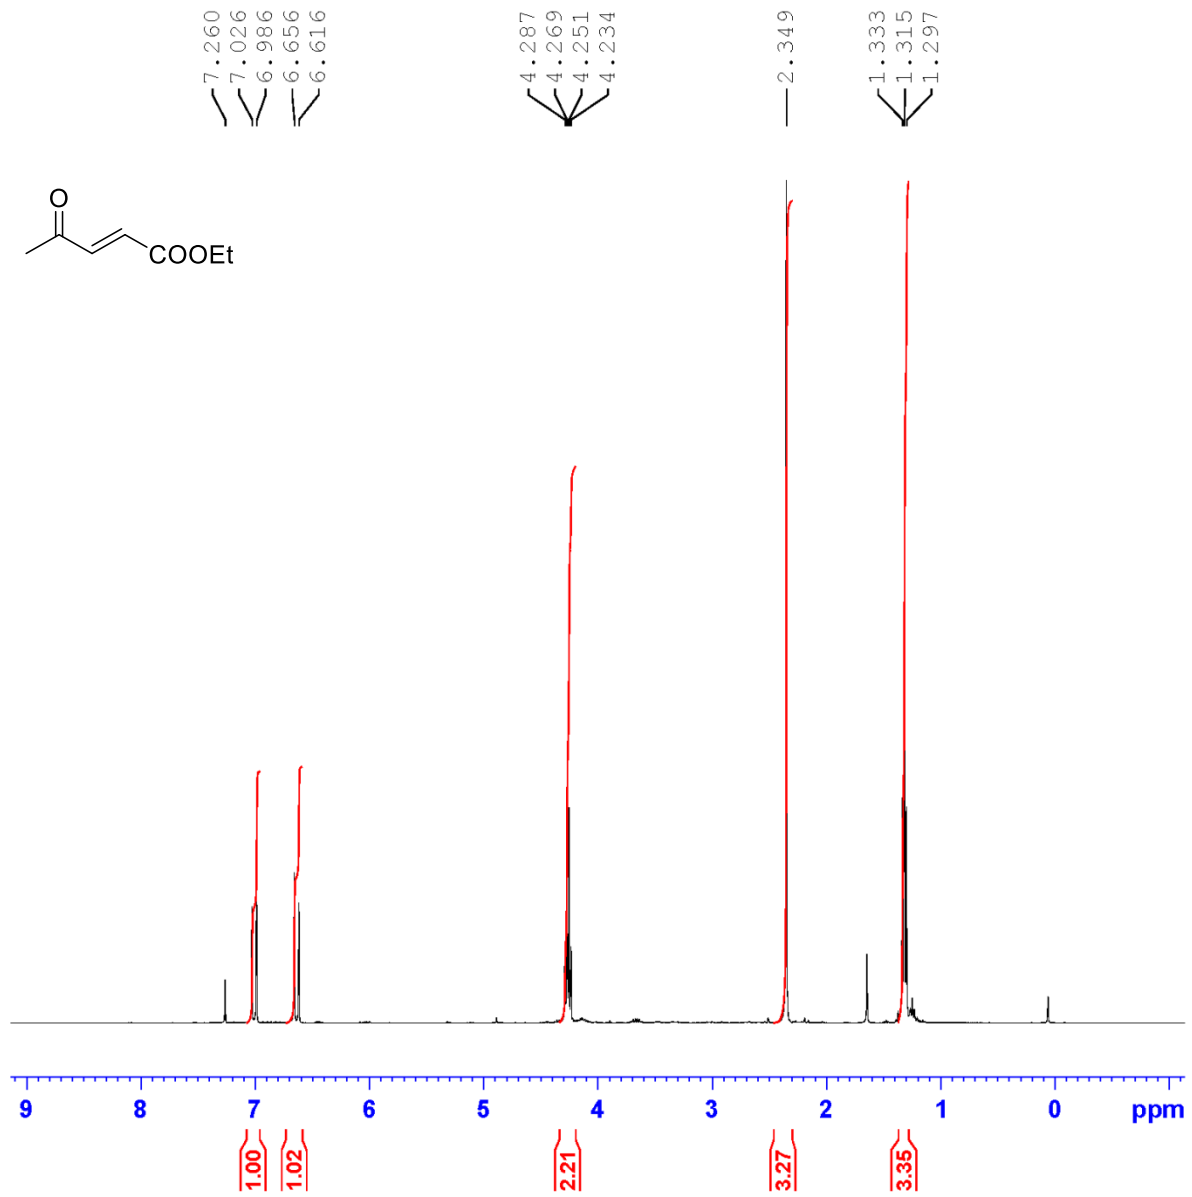

```

Current Data Parameters
NAME      yf-16-0816-s1
EXPNO     10
PROCNO    1

F2 - Acquisition Parameters
Date_     20160816
Time      13.58
INSTRUM   spect
PROBHD    5 mm PABBO BB/
PULPROG   zg30
TD         65536
SOLVENT   CDCl3
NS         16
DS         2
SWH        8012.820 Hz
FIDRES     0.122266 Hz
AQ         4.0894465 sec
RG         49.09
DW         62.400 usec
DE         6.50 usec
TE         298.7 K
D1         1.00000000 sec
TD0        1

===== CHANNEL f1 =====
SFO1      400.1324710 MHz
NUC1       1H
P1         15.00 usec
PLW1       8.00000000 W

F2 - Processing parameters
SI         65536
SF         400.1300090 MHz
WDW        EM
SSB        0
LB         0.30 Hz
GB         0
PC         1.00

```

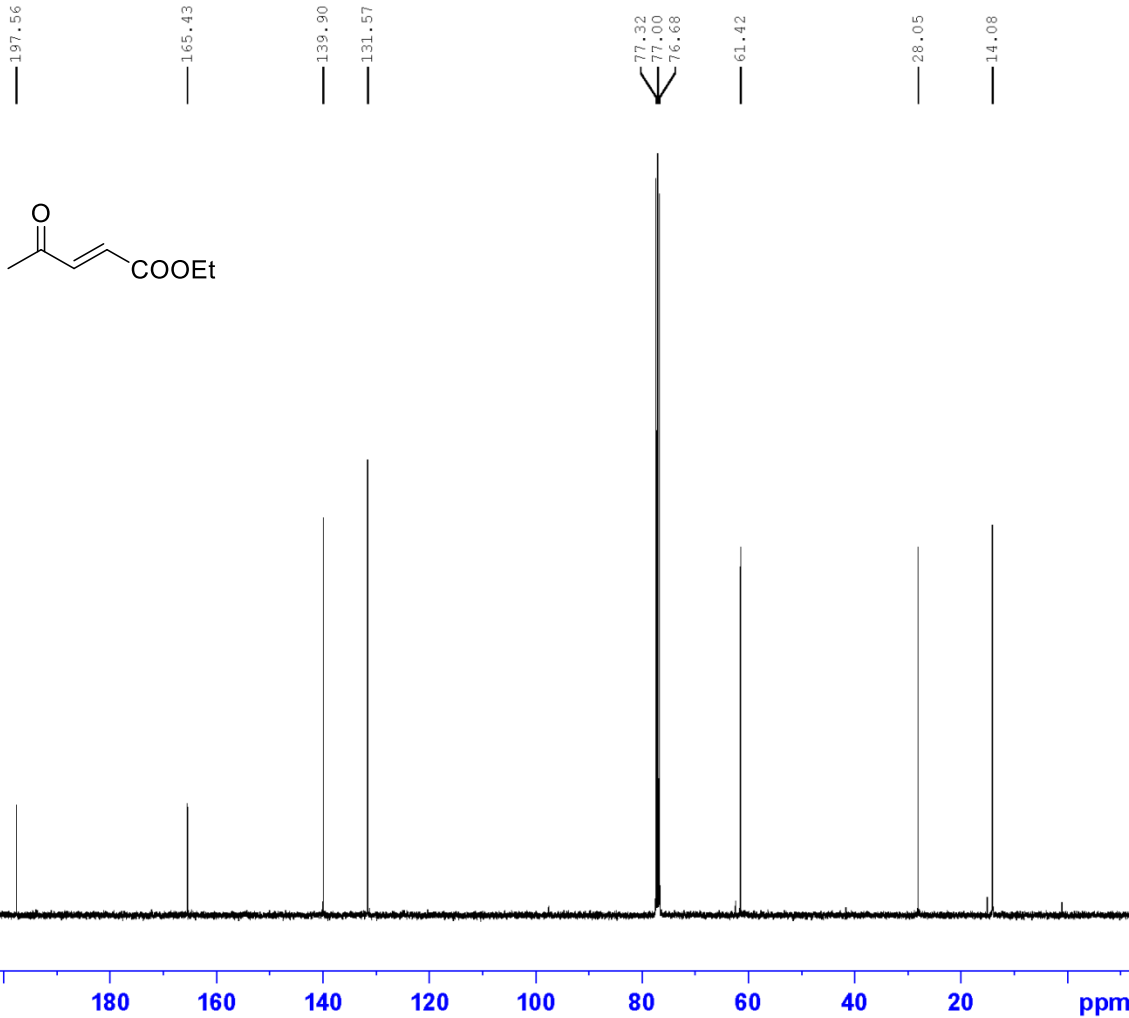

Current Data Parameters  
 NAME yf-16-0816-s1-c  
 EXPNO 10  
 PROCNO 1

F2 - Acquisition Parameters  
 Date\_ 20160816  
 Time\_ 15.30  
 INSTRUM spect  
 PROBHD 5 mm PABBO BB/  
 PULPROG zgpg30  
 TD 65536  
 SOLVENT CDC13  
 NS 1024  
 DS 4  
 SWH 24038.461 Hz  
 FIDRES 0.366798 Hz  
 AQ 1.3631488 sec  
 RG 195.88  
 DW 20.800 usec  
 DE 6.50 usec  
 TE 299.9 K  
 D1 2.0000000 sec  
 D11 0.0300000 sec  
 TD0 1

===== CHANNEL f1 =====  
 SFO1 100.6228293 MHz  
 NUC1 13C  
 P1 10.00 usec  
 PLW1 70.0000000 W

===== CHANNEL f2 =====  
 SFO2 400.1316005 MHz  
 NUC2 1H  
 CPDPRG[2] waltz16  
 PCPD2 80.00 usec  
 PLW2 8.0000000 W  
 PLW12 0.28125000 W  
 PLW13 0.28125000 W

F2 - Processing parameters  
 SI 32768  
 SF 100.6127713 MHz  
 WDW EM  
 SSB 0  
 LB 1.00 Hz  
 GB 0  
 PC 1.40



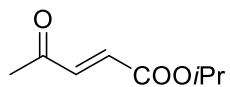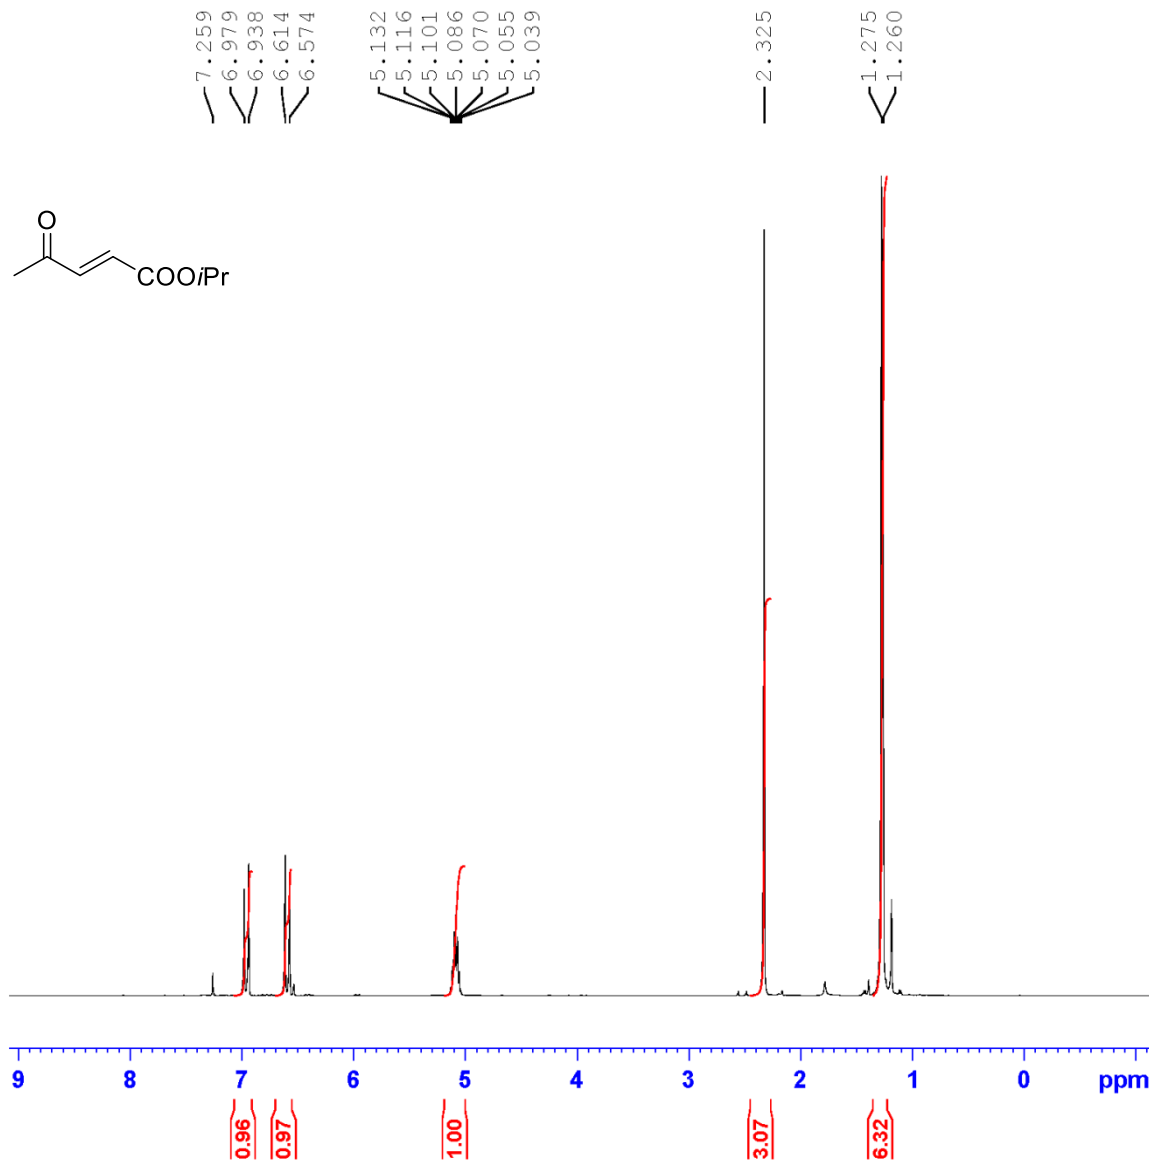

Current Data Parameters  
 NAME yf-16-0816-s2  
 EXPNO 10  
 PROCNO 1

F2 - Acquisition Parameters  
 Date\_ 20160816  
 Time\_ 14.02  
 INSTRUM spect  
 PROBHD 5 mm PABBO BB/  
 PULPROG zg30  
 TD 65536  
 SOLVENT CDCl3  
 NS 16  
 DS 2  
 SWH 8012.820 Hz  
 FIDRES 0.122266 Hz  
 AQ 4.0894465 sec  
 RG 31.13  
 DW 62.400 usec  
 DE 6.50 usec  
 TE 298.7 K  
 D1 1.00000000 sec  
 TD0 1

===== CHANNEL f1 =====  
 SFO1 400.1324710 MHz  
 NUC1 1H  
 P1 15.00 usec  
 PLW1 8.00000000 W

F2 - Processing parameters  
 SI 65536  
 SF 400.1300090 MHz  
 WDW EM  
 SSB 0  
 LB 0.30 Hz  
 GB 0  
 PC 1.00

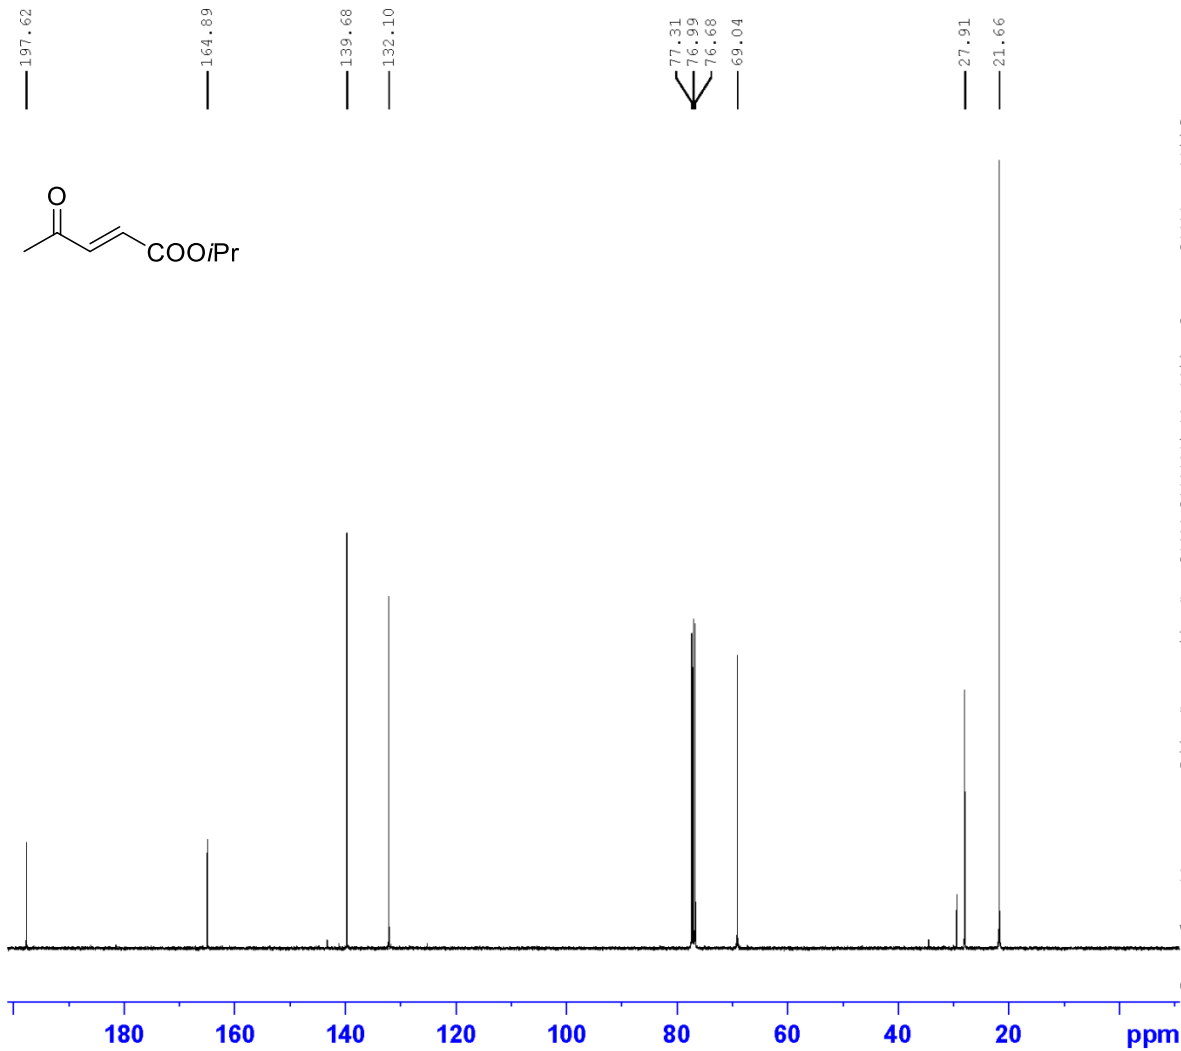

Current Data Parameters  
 NAME YF-16-0816-S2-C  
 EXPNO 10  
 PROCNO 1

F2 - Acquisition Parameters  
 Date\_ 20160816  
 Time\_ 21.36  
 INSTRUM spect  
 PROBHD 5 mm PABBO BB/  
 PULPROG zgpg30  
 TD 65536  
 SOLVENT CDCl3  
 NS 1300  
 DS 4  
 SWH 24038.461 Hz  
 FIDRES 0.366798 Hz  
 AQ 1.3631488 sec  
 RG 195.88  
 DW 20.800 usec  
 DE 6.50 usec  
 TE 299.8 K  
 D1 2.00000000 sec  
 D11 0.03000000 sec  
 TD0 1

===== CHANNEL f1 =====  
 SFO1 100.6228293 MHz  
 NUC1 13C  
 P1 10.00 usec  
 PLW1 70.00000000 W

===== CHANNEL f2 =====  
 SFO2 400.1316005 MHz  
 NUC2 1H  
 CPDPRG[2] waltz16  
 PCPD2 80.00 usec  
 PLW2 8.00000000 W  
 PLW12 0.28125000 W  
 PLW13 0.28125000 W

F2 - Processing parameters  
 SI 32768  
 SF 100.6127736 MHz  
 WDW EM  
 SSB 0  
 LB 1.00 Hz  
 GB 0  
 PC 1.40

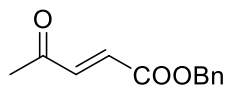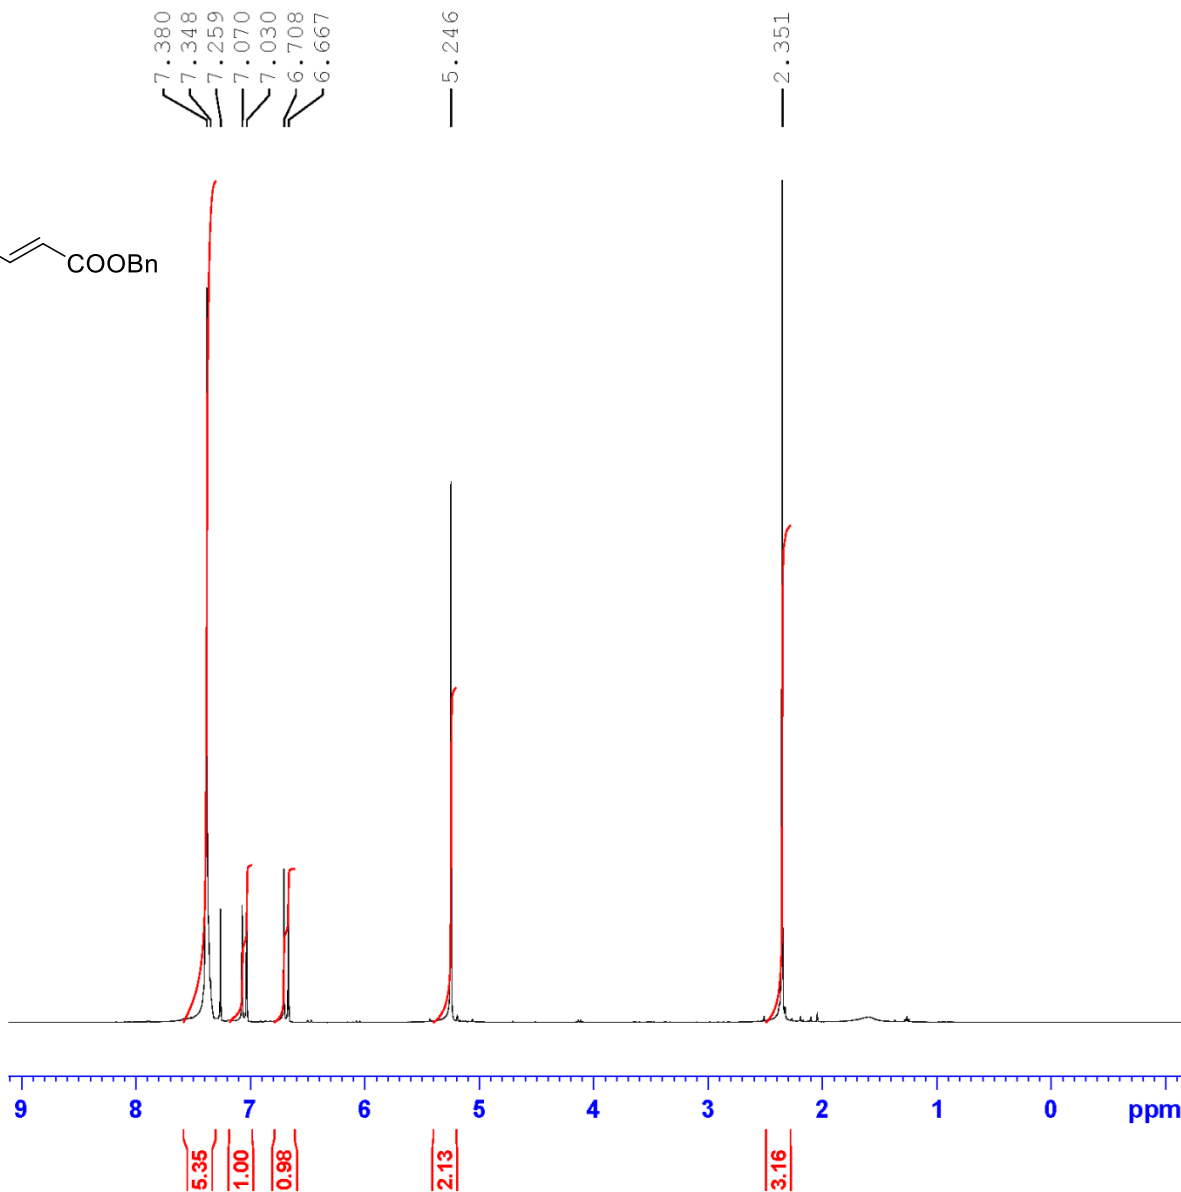

Current Data Parameters  
 NAME yf-16-0816-s3  
 EXPNO 10  
 PROCNO 1

F2 - Acquisition Parameters  
 Date\_ 20160816  
 Time\_ 14.06  
 INSTRUM spect  
 PROBHD 5 mm PABBO BB/  
 PULPROG zg30  
 TD 65536  
 SOLVENT CDCl3  
 NS 16  
 DS 2  
 SWH 8012.820 Hz  
 FIDRES 0.122266 Hz  
 AQ 4.0894465 sec  
 RG 71.01  
 DW 62.400 usec  
 DE 6.50 usec  
 TE 298.7 K  
 D1 1.00000000 sec  
 TD0 1

==== CHANNEL f1 =====  
 SFO1 400.1324710 MHz  
 NUC1 1H  
 P1 15.00 usec  
 PLW1 8.00000000 W

F2 - Processing parameters  
 SI 65536  
 SF 400.1300095 MHz  
 WDW EM  
 SSB 0  
 LB 0.30 Hz  
 GB 0  
 FC 1.00

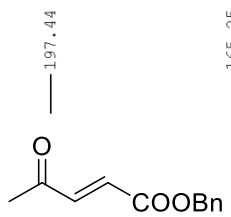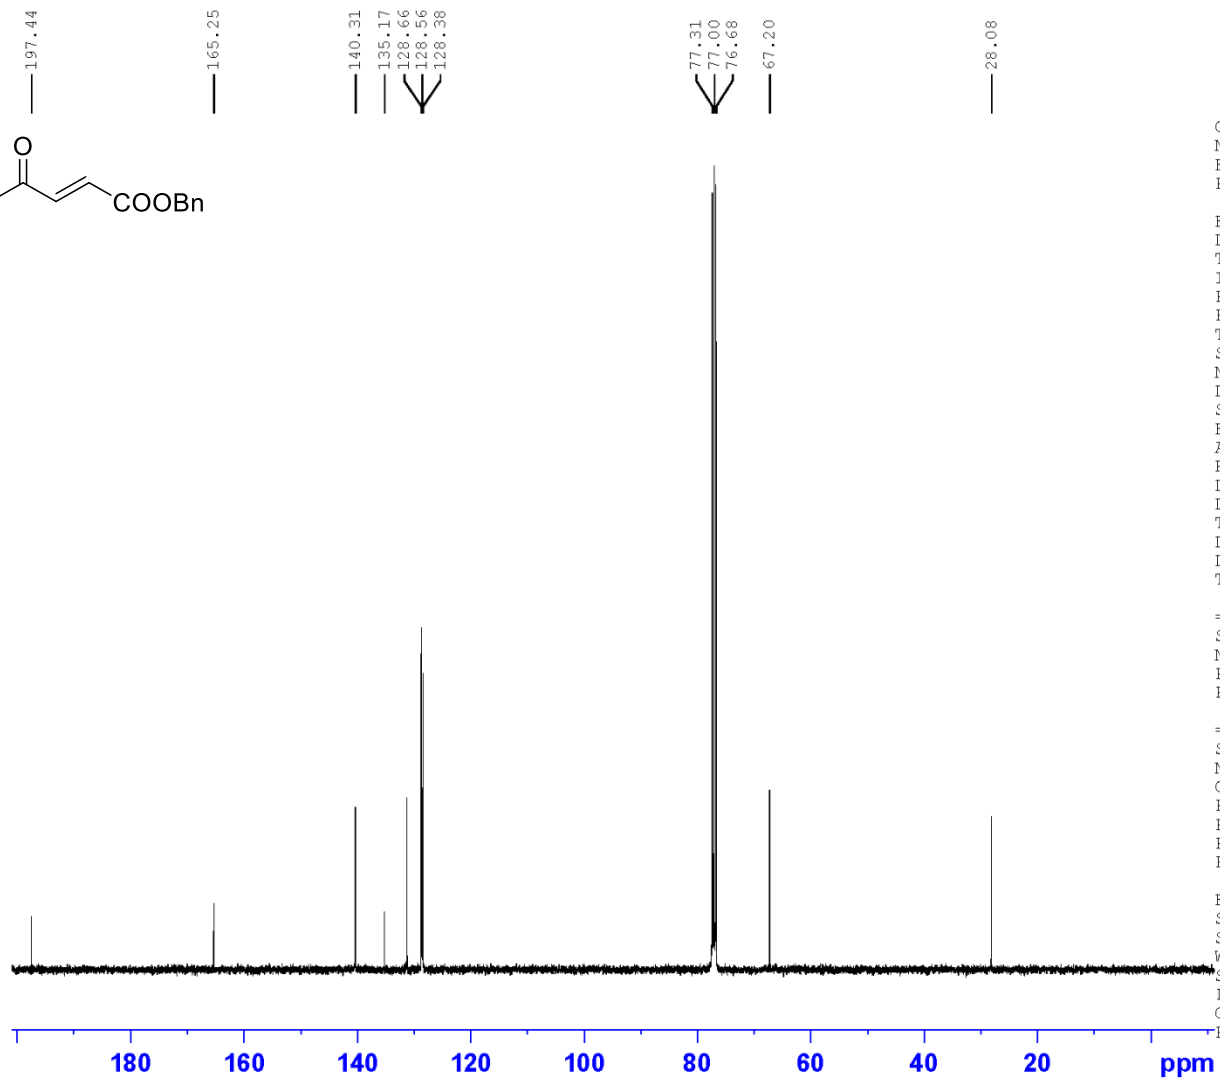

```

Current Data Parameters
NAME      YF-16-0816-S3-C
EXPNO     10
PROCNO    1

F2 - Acquisition Parameters
Date_     20160816
Time      22.55
INSTRUM   spect
PROBHD    5 mm PABBO BB/
PULPROG   zgpg30
TD         65536
SOLVENT   CDCl3
NS         1024
DS         4
SWH        24038.461 Hz
FIDRES     0.366798 Hz
AQ         1.3631488 sec
RG         195.88
DW         20.800 usec
DE         6.50 usec
TE         299.8 K
D1         2.00000000 sec
D11        0.03000000 sec
TD0        1

===== CHANNEL f1 =====
SFO1      100.6228293 MHz
NUC1       13C
P1         10.00 usec
PLW1       70.00000000 W

===== CHANNEL f2 =====
SFO2      400.1316005 MHz
NUC2       1H
CPDPRG2   waltz16
PCPD2     80.00 usec
PLW2       8.00000000 W
PLW12     0.28125000 W
PLW13     0.28125000 W

F2 - Processing parameters
SI         32768
SF         100.6127713 MHz
WDW        EM
SSB        0
LB         1.00 Hz
GB         0
PC         1.40

```

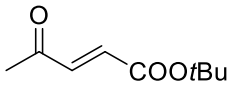

7.259  
6.931  
6.891  
6.588  
6.547

2.339  
1.506

```

Current Data Parameters
NAME      yf-16-0816-s4
EXPNO     10
PROCNO    1

F2 - Acquisition Parameters
Date_     20160816
Time      14.11
INSTRUM   spect
PROBHD    5 mm PABBO BB/
PULPROG   zg30
TD         65536
SOLVENT   CDCl3
NS         16
DS         2
SWH       8012.820 Hz
FIDRES    0.122266 Hz
AQ         4.0894465 sec
RG         62.88
DW         62.400 usec
DE         6.50 usec
TE         298.7 K
D1         1.00000000 sec
TD0        1

===== CHANNEL f1 =====
SFO1      400.1324710 MHz
NUC1       1H
P1         15.00 usec
PLW1       8.00000000 W

F2 - Processing parameters
SI         65536
SF         400.1300096 MHz
WDW        EM
SSB        0
LB         0.30 Hz
GB         0
PC         1.00
  
```

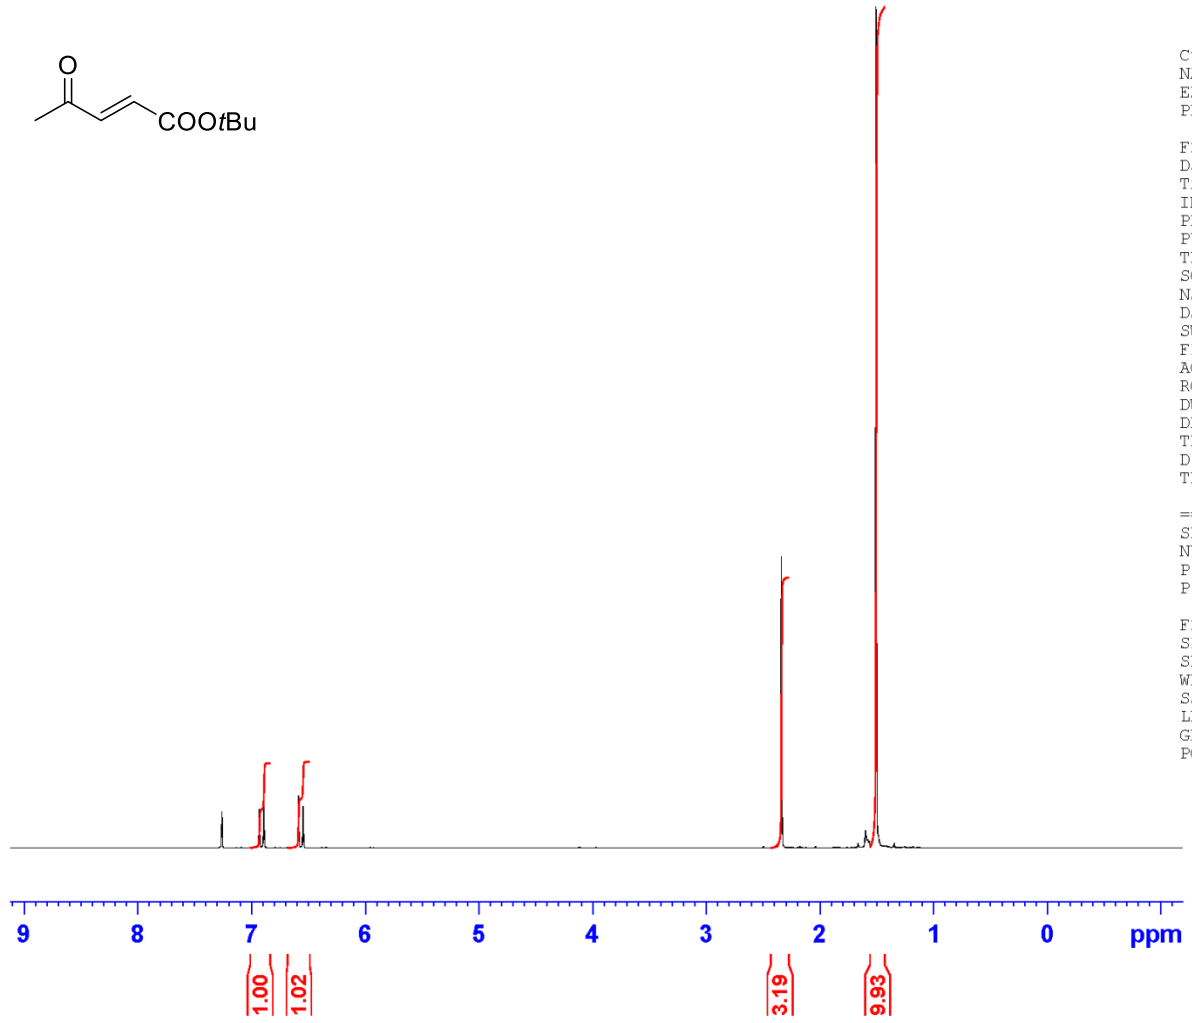

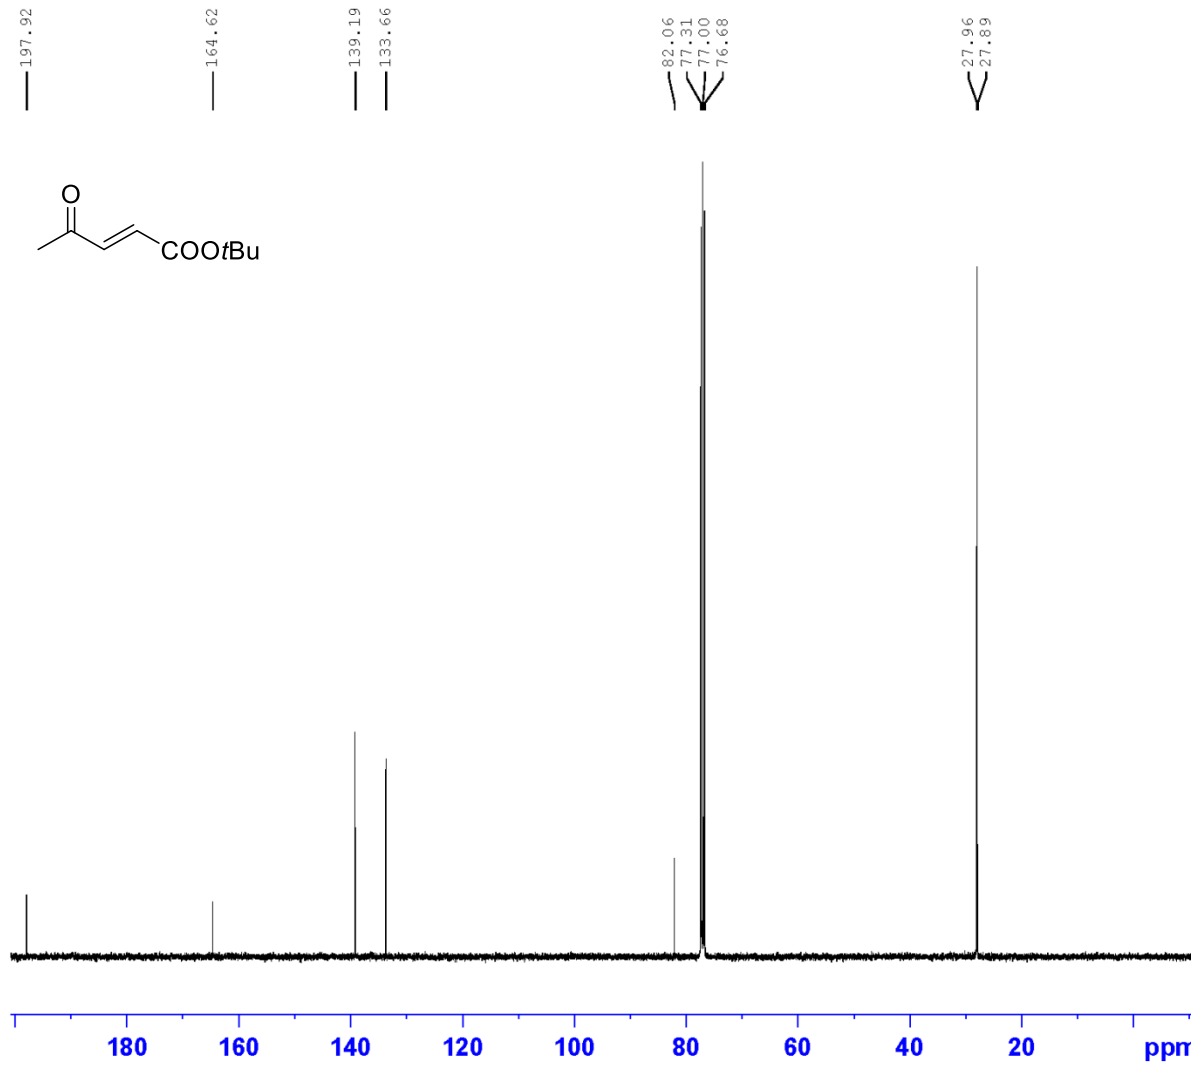

Current Data Parameters  
 NAME YF-16-0816-S4-C  
 EXPNO 10  
 PROCNO 1

F2 - Acquisition Parameters  
 Date\_ 20160817  
 Time\_ 11.02  
 INSTRUM spect  
 PROBHD 5 mm PABBO BB/  
 PULPROG zgpg30  
 TD 65536  
 SOLVENT CDCl3  
 NS 1024  
 DS 4  
 SWH 24038.461 Hz  
 FIDRES 0.366798 Hz  
 AQ 1.3631488 sec  
 RG 195.88  
 DW 20.800 usec  
 DE 6.50 usec  
 TE 299.8 K  
 D1 2.00000000 sec  
 D11 0.03000000 sec  
 TD0 1

===== CHANNEL f1 =====  
 SFO1 100.6228293 MHz  
 NUC1 13C  
 P1 10.00 usec  
 PLW1 70.00000000 W

===== CHANNEL f2 =====  
 SFO2 400.1316005 MHz  
 NUC2 1H  
 CPDPRG[2] waltz16  
 PCPD2 80.00 usec  
 PLW2 8.00000000 W  
 PLW12 0.28125000 W  
 PLW13 0.28125000 W

F2 - Processing parameters  
 SI 32768  
 SF 100.6127706 MHz  
 WDW EM  
 SSB 0  
 LB 1.00 Hz  
 GB 0  
 PC 1.40

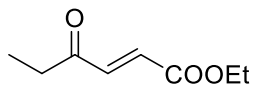

7.260  
7.065  
7.025  
6.675  
6.635

4.271  
4.253  
4.236  
4.218

2.678  
2.661  
2.643  
2.625

1.321  
1.303  
1.285  
1.131  
1.113  
1.095

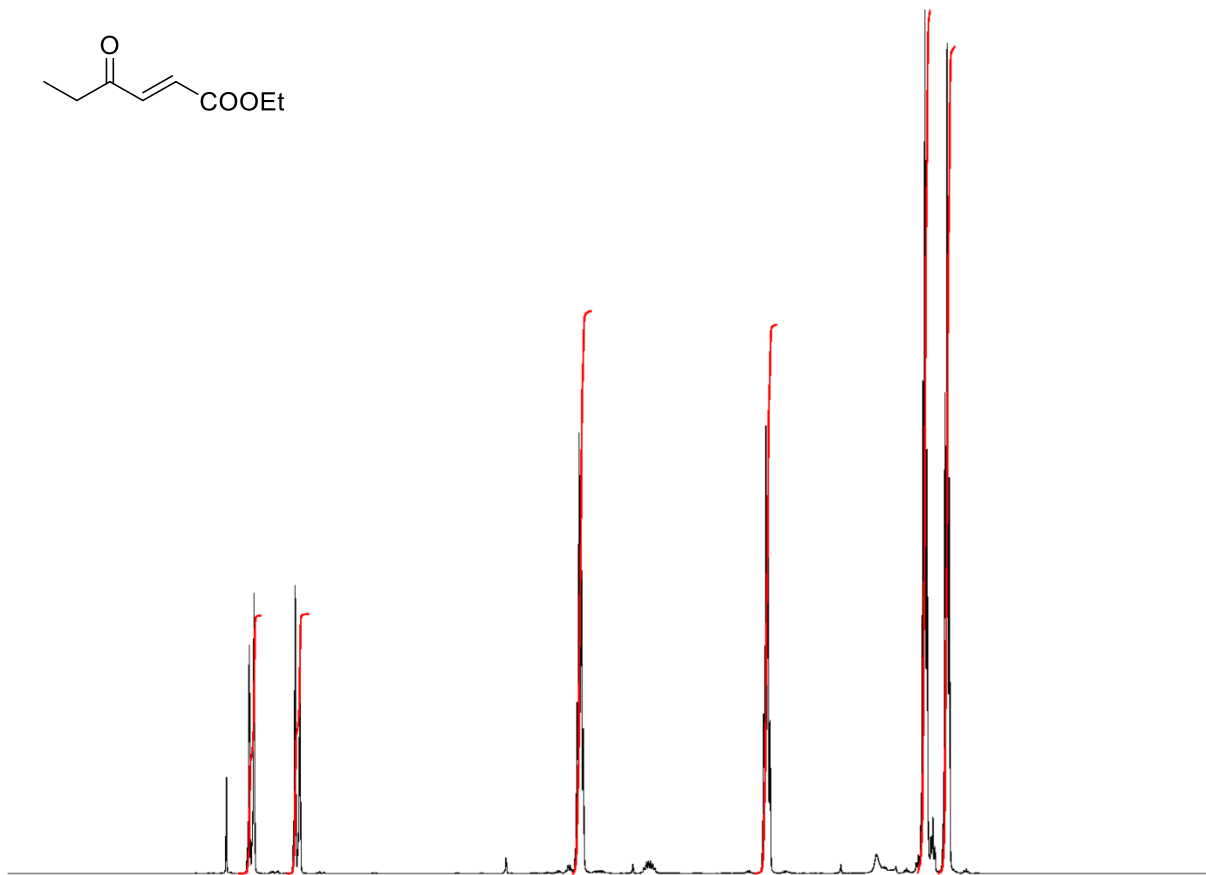

9 8 7 6 5 4 3 2 1 0 ppm

1.00  
1.01

2.18

2.13

3.35  
3.20

Current Data Parameters  
NAME yf-16-0816-s5  
EXPNO 10  
PROCNO 1

F2 - Acquisition Parameters  
Date\_ 20160816  
Time\_ 14.15  
INSTRUM spect  
PROBHD 5 mm PABBO BB/  
PULPROG zg30  
TD 65536  
SOLVENT CDCl3  
NS 16  
DS 2  
SWH 8012.820 Hz  
FIDRES 0.122266 Hz  
AQ 4.0894465 sec  
RG 31.13  
DW 62.400 usec  
DE 6.50 usec  
TE 298.7 K  
D1 1.00000000 sec  
TD0 1

===== CHANNEL f1 =====  
SFO1 400.1324710 MHz  
NUC1 1H  
P1 15.00 usec  
PLW1 8.00000000 W

F2 - Processing parameters  
SI 65536  
SF 400.1300091 MHz  
WDW EM  
SSB 0  
LB 0.30 Hz  
GB 0  
PC 1.00

200.09  
 165.54  
 139.12  
 130.58  
 77.31  
 76.99  
 76.68  
 61.32  
 34.75  
 14.07  
 7.55

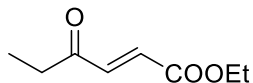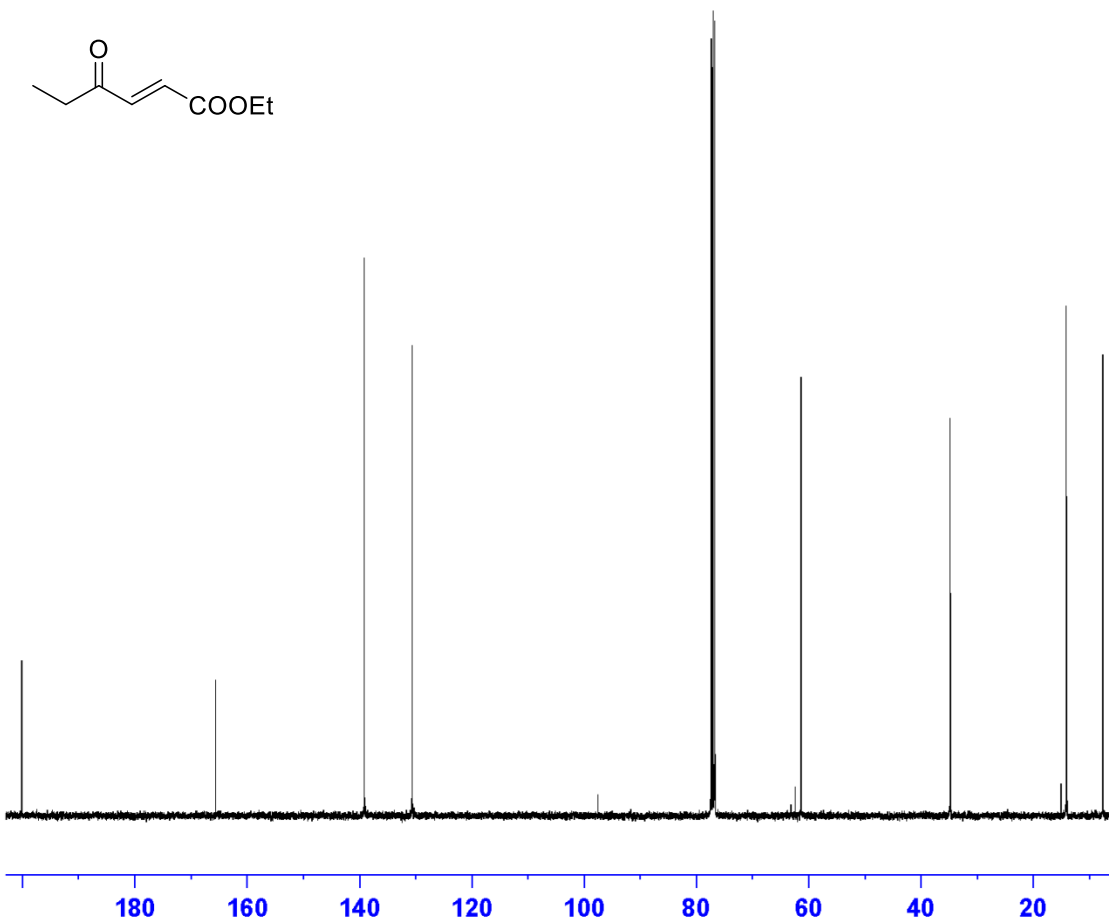

Current Data Parameters  
 NAME YF-16-0816-S5-C  
 EXPNO 10  
 PROCNO 1

F2 - Acquisition Parameters  
 Date\_ 20160817  
 Time\_ 12.12  
 INSTRUM spect  
 PROBHD 5 mm PABBO BB/  
 PULPROG zgpg30  
 TD 65536  
 SOLVENT CDCl3  
 NS 1024  
 DS 4  
 SWH 24038.461 Hz  
 FIDRES 0.366798 Hz  
 AQ 1.3631488 sec  
 RG 195.88  
 DW 20.800 usec  
 DE 6.50 usec  
 TE 299.9 K  
 D1 2.00000000 sec  
 D11 0.03000000 sec  
 TD0 1

==== CHANNEL f1 =====  
 SFO1 100.6228293 MHz  
 NUC1 13C  
 P1 10.00 usec  
 PLW1 70.00000000 W

==== CHANNEL f2 =====  
 SFO2 400.1316005 MHz  
 NUC2 1H  
 CPDPRG[2] waltz16  
 PCPD2 80.00 usec  
 PLW2 8.00000000 W  
 PLW12 0.28125000 W  
 PLW13 0.28125000 W

F2 - Processing parameters  
 SI 32768  
 SF 100.6127721 MHz  
 WDW EM  
 SSB 0  
 LB 1.00 Hz  
 GB 0  
 PC 1.40



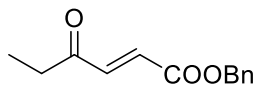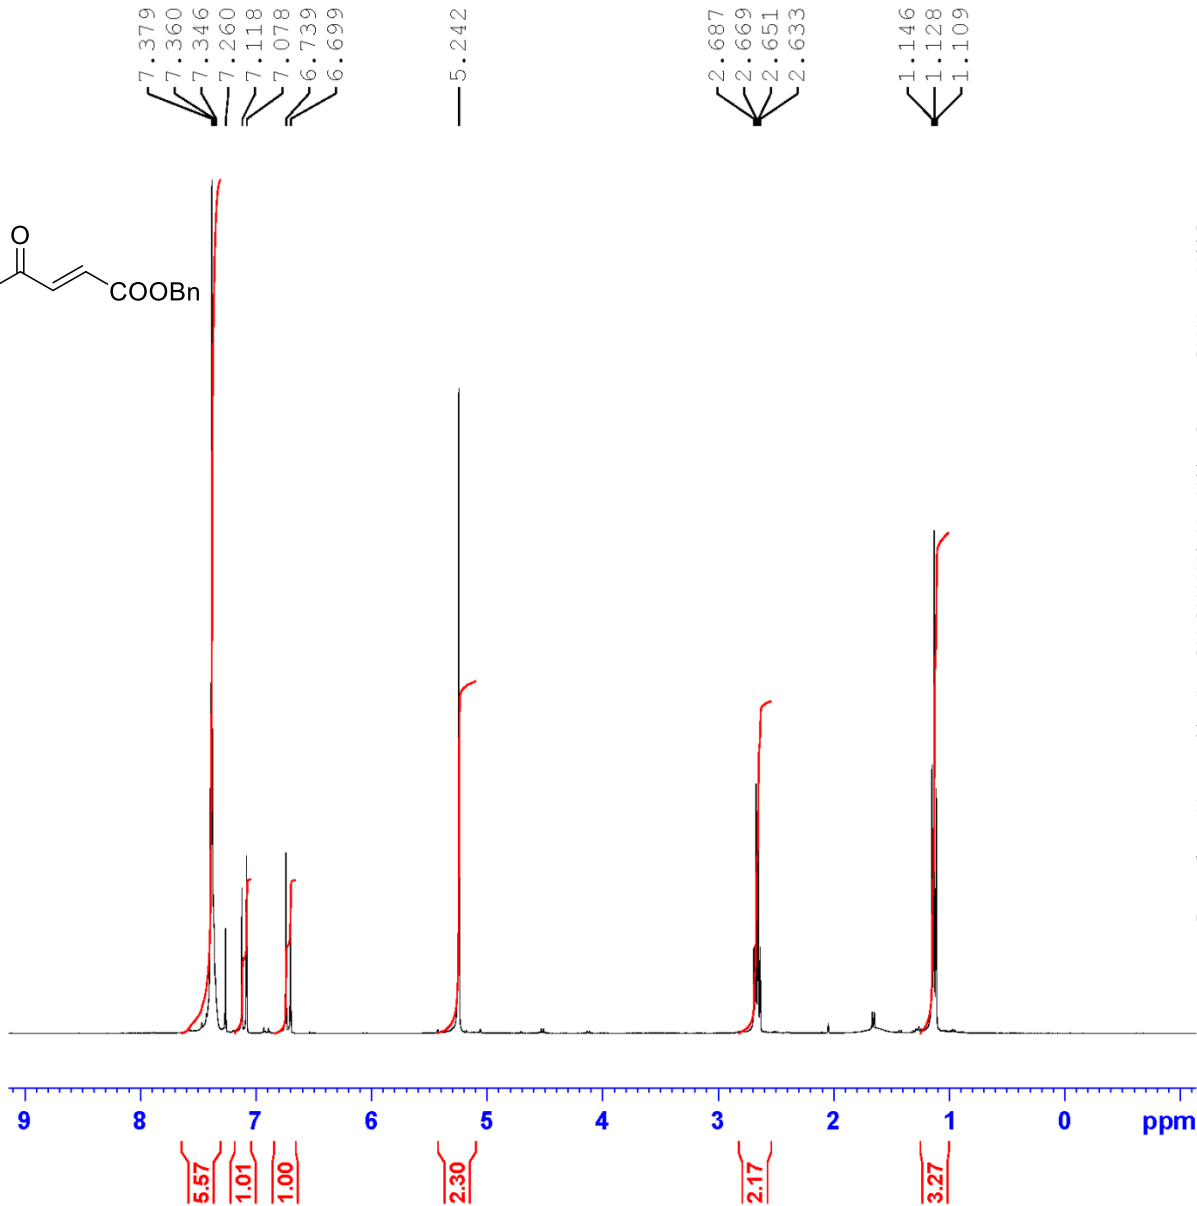

Current Data Parameters  
 NAME yf-16-0816-s6  
 EXPNO 10  
 PROCNO 1

F2 - Acquisition Parameters  
 Date\_ 20160816  
 Time\_ 14.19  
 INSTRUM spect  
 PROBHD 5 mm PABBO BB/  
 PULPROG zg30  
 TD 65536  
 SOLVENT CDCl3  
 NS 16  
 DS 2  
 SWH 8012.820 Hz  
 FIDRES 0.122266 Hz  
 AQ 4.0894465 sec  
 RG 62.88  
 DW 62.400 usec  
 DE 6.50 usec  
 TE 298.8 K  
 D1 1.00000000 sec  
 TD0 1

==== CHANNEL f1 =====  
 SFO1 400.1324710 MHz  
 NUC1 1H  
 P1 15.00 usec  
 PLW1 8.00000000 W

F2 - Processing parameters  
 SI 65536  
 SF 400.1300090 MHz  
 WDW EM  
 SSB 0  
 LB 0.30 Hz  
 GB 0  
 PC 1.00

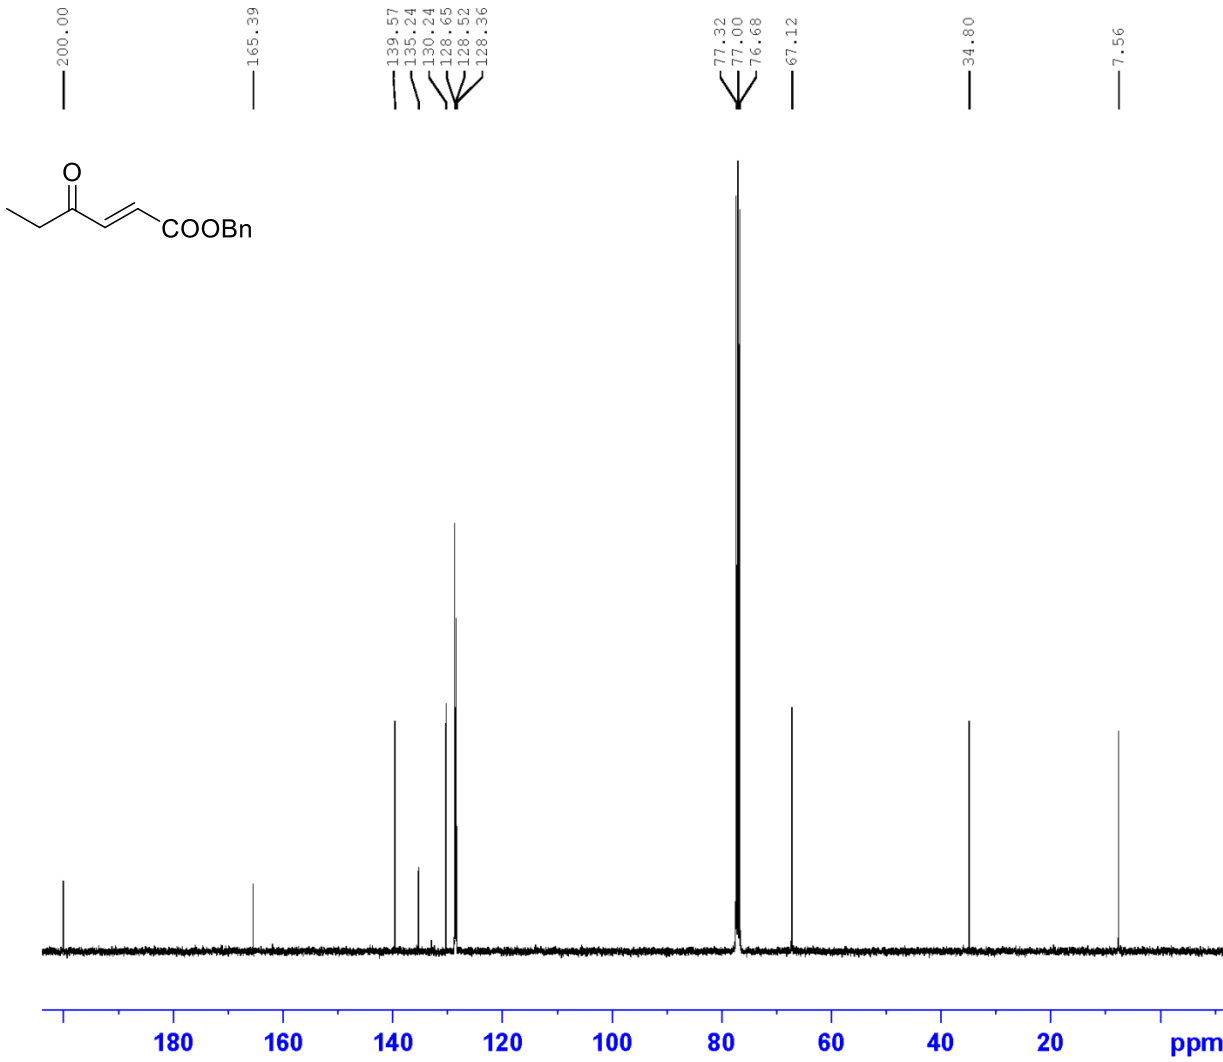

```

Current Data Parameters
NAME      YF-16-0816-S6-C
EXPNO     10
PROCNO    1

F2 - Acquisition Parameters
Date_     20160817
Time_     13.13
INSTRUM   spect
PROBHD    5 mm PABBO BB/
PULPROG   zgpg30
TD         65536
SOLVENT   CDC13
NS         1024
DS         4
SWH        24038.461 Hz
FIDRES     0.366798 Hz
AQ         1.3631488 sec
RG         195.88
DW         20.800 usec
DE         6.50 usec
TE         299.9 K
D1         2.00000000 sec
D11        0.03000000 sec
TD0        1

===== CHANNEL f1 =====
SFO1      100.6228293 MHz
NUC1       13C
P1         10.00 usec
PLW1       70.00000000 W

===== CHANNEL f2 =====
SFO2      400.1316005 MHz
NUC2       1H
CPDPRG[2] waltz16
PCPD2      80.00 usec
PLW2       8.00000000 W
PLW12      0.28125000 W
PLW13      0.28125000 W

F2 - Processing parameters
SI         32768
SF         100.6127713 MHz
WDW        EM
SSB        0
LB         1.00 Hz
GB         0
PC         1.40

```

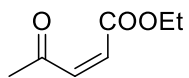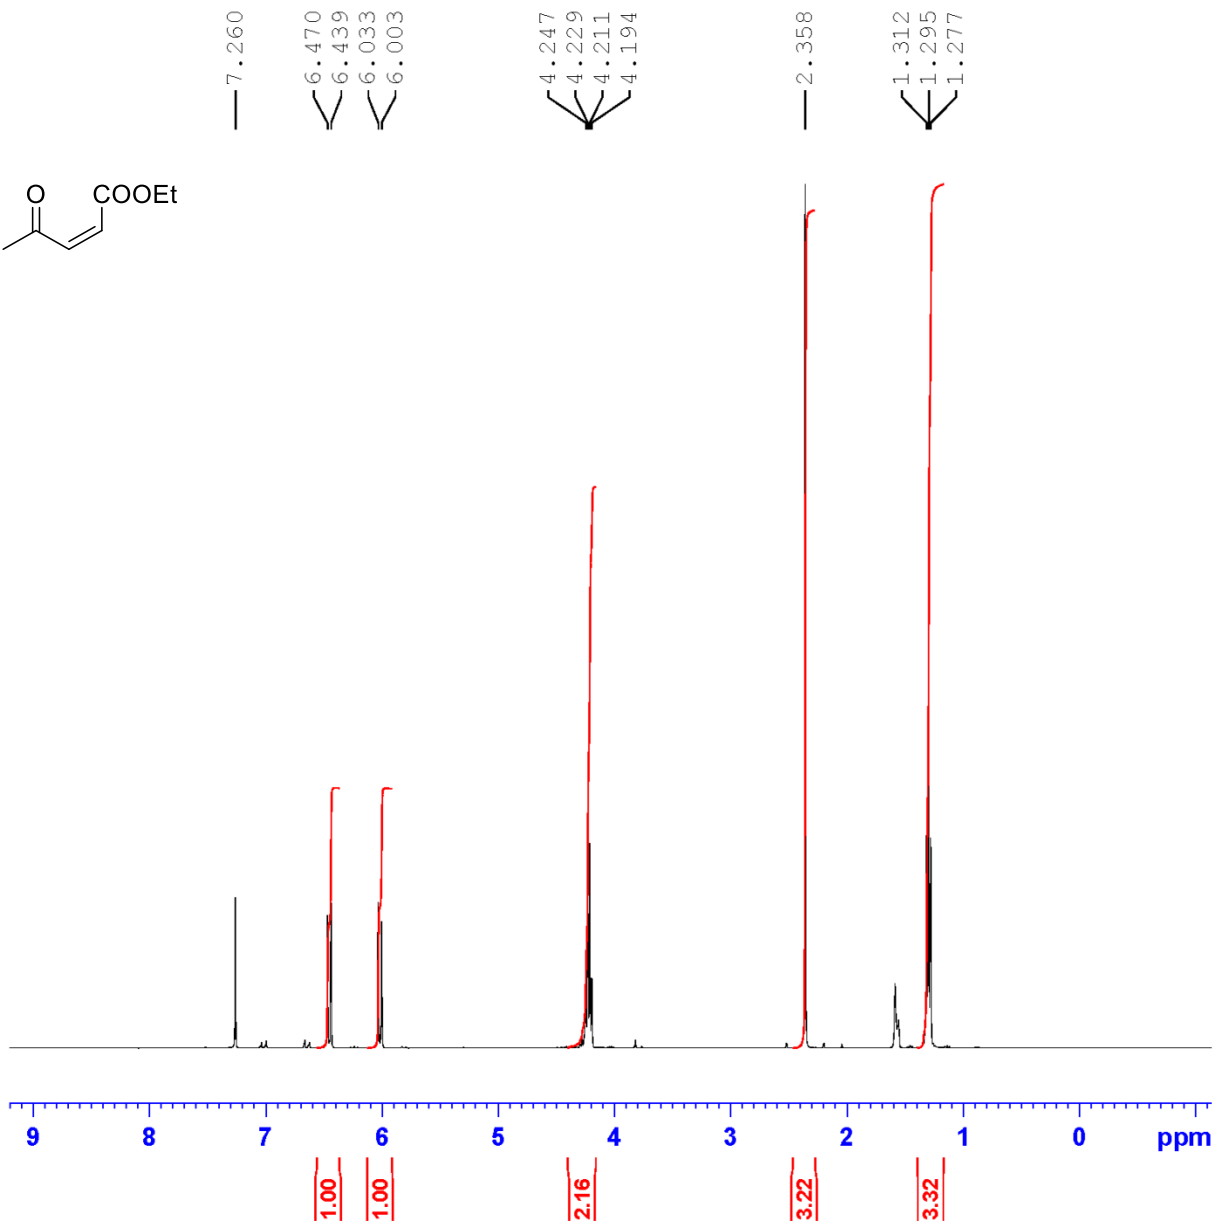

Current Data Parameters  
 NAME yf-16-0816-s7-1  
 EXPNO 10  
 PROCNO 1

F2 - Acquisition Parameters  
 Date\_ 20160816  
 Time\_ 15.42  
 INSTRUM spect  
 PROBHD 5 mm PABBO BB/  
 PULPROG zg30  
 TD 65536  
 SOLVENT CDC13  
 NS 16  
 DS 2  
 SWH 8012.820 Hz  
 FIDRES 0.122266 Hz  
 AQ 4.0894465 sec  
 RG 77.81  
 DW 62.400 usec  
 DE 6.50 usec  
 TE 299.0 K  
 D1 1.00000000 sec  
 TD0 1

===== CHANNEL f1 =====  
 SFO1 400.1324710 MHz  
 NUC1 1H  
 P1 15.00 usec  
 PLW1 8.00000000 W

F2 - Processing parameters  
 SI 65536  
 SF 400.1300092 MHz  
 WDW EM  
 SSB 0  
 LB 0.30 Hz  
 GB 0  
 PC 1.00

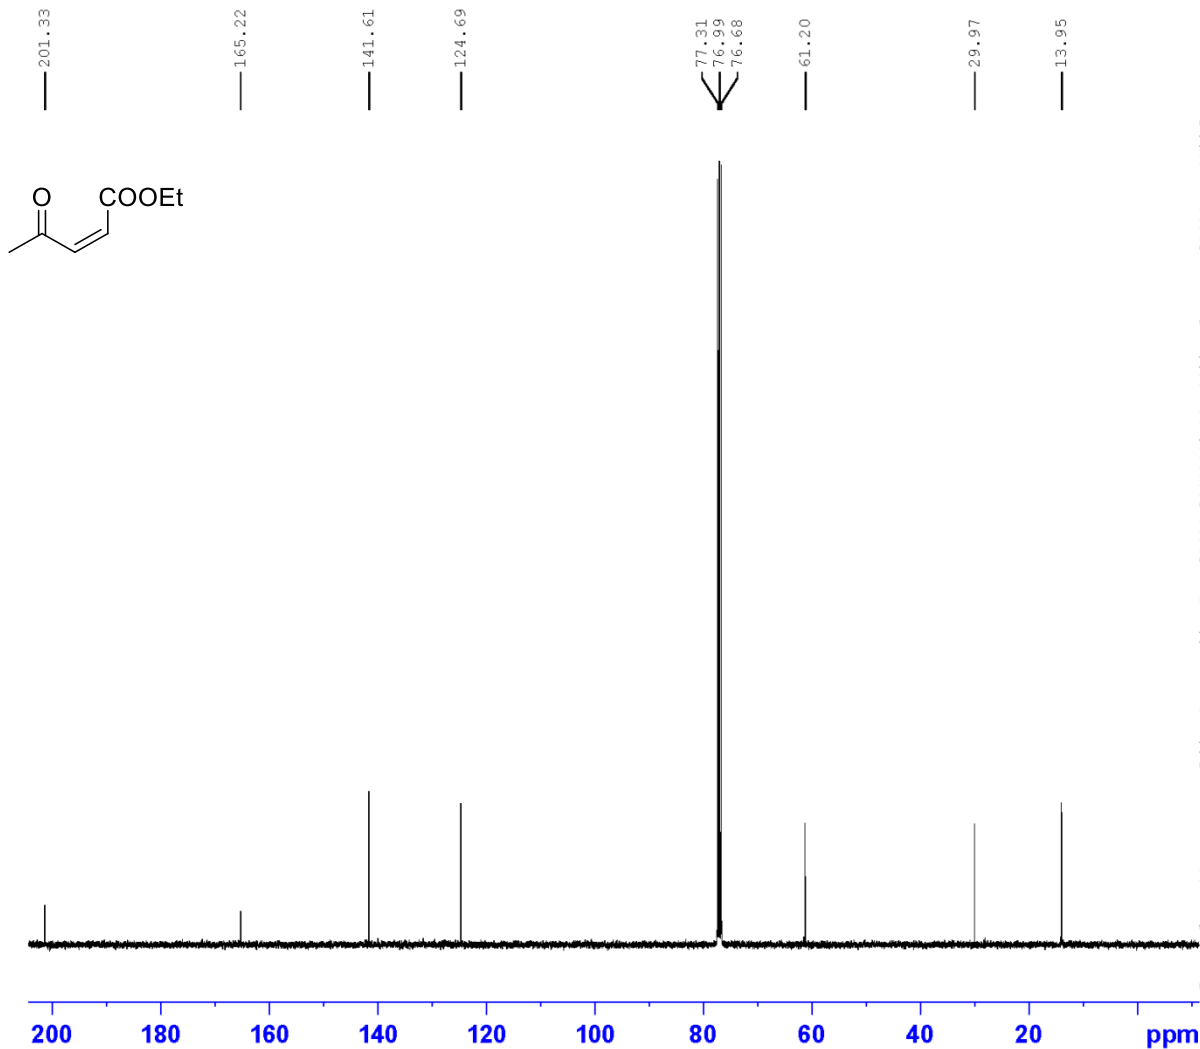

Current Data Parameters  
 NAME YF-16-0816-S7-C  
 EXPNO 10  
 PROCNO 1

F2 - Acquisition Parameters  
 Date 20160817  
 Time 14.15  
 INSTRUM spect  
 PROBHD 5 mm PABBO BB/  
 PULPROG zgpg30  
 TD 65536  
 SOLVENT CDC13  
 NS 1024  
 DS 4  
 SWH 24038.461 Hz  
 FIDRES 0.366798 Hz  
 AQ 1.3631488 sec  
 RG 195.88  
 DW 20.800 usec  
 DE 6.50 usec  
 TE 299.9 K  
 D1 2.00000000 sec  
 D11 0.03000000 sec  
 TD0 1

==== CHANNEL f1 =====  
 SFO1 100.6228293 MHz  
 NUC1 13C  
 P1 10.00 usec  
 PLW1 70.00000000 W

==== CHANNEL f2 =====  
 SFO2 400.1316005 MHz  
 NUC2 1H  
 CPDPRG[2] waltz16  
 FCPD2 80.00 usec  
 PLW2 8.00000000 W  
 PLW12 0.28125000 W  
 PLW13 0.28125000 W

F2 - Processing parameters  
 SI 32768  
 SF 100.6127706 MHz  
 WDW EM  
 SSB 0  
 LB 1.00 Hz  
 GB 0  
 PC 1.40

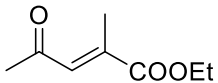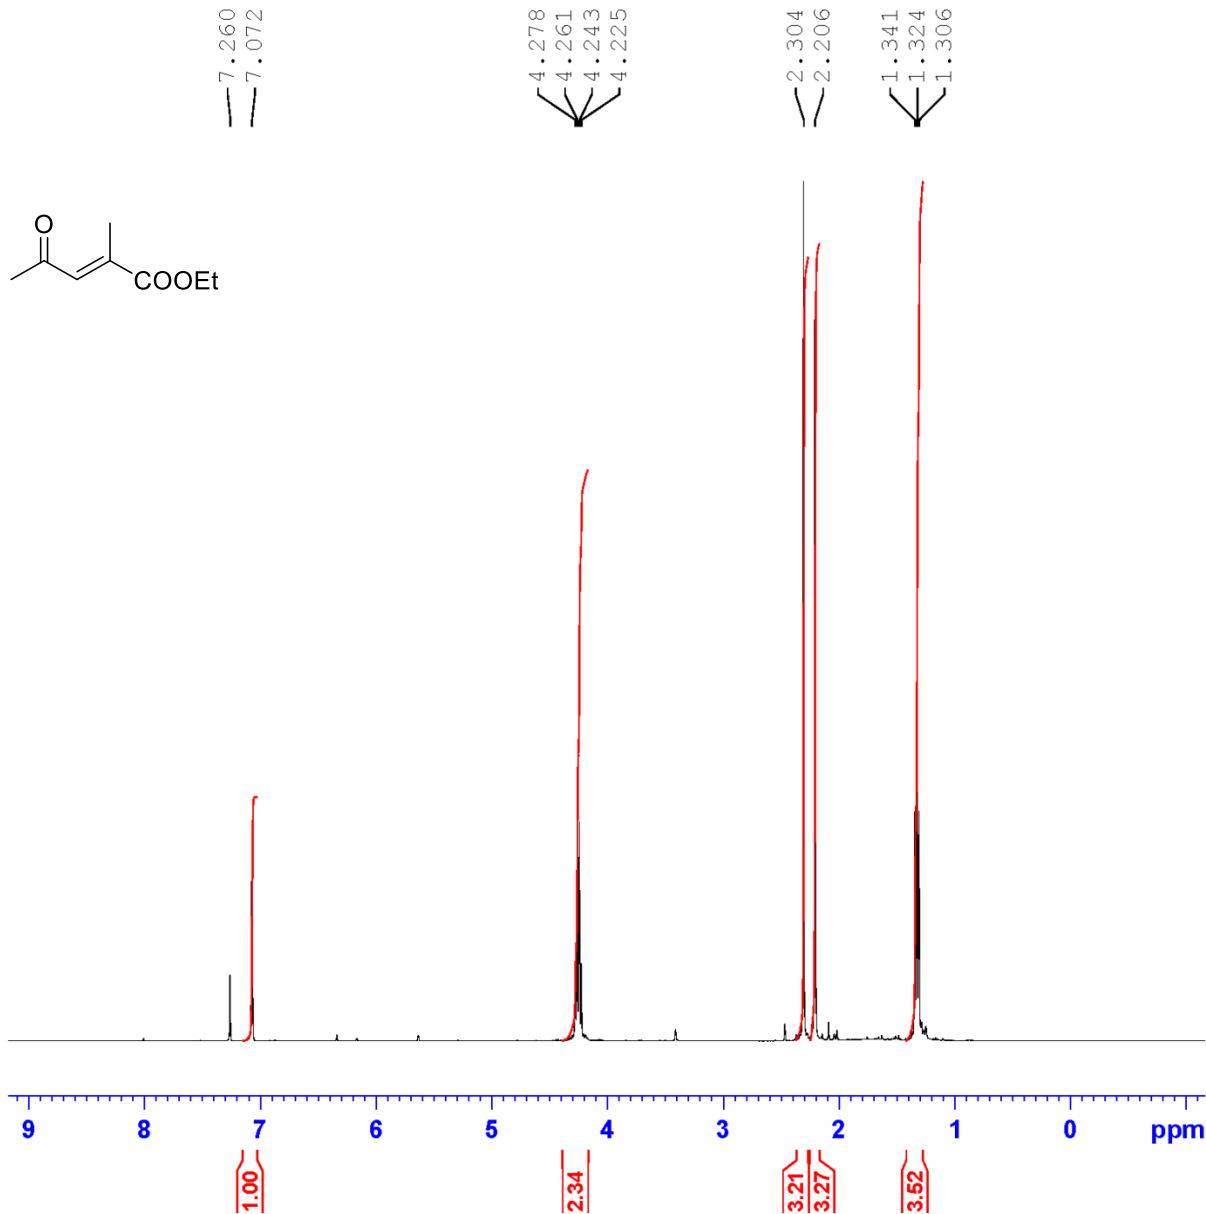

Current Data Parameters  
 NAME yf-16-0816-s8-1  
 EXPNO 10  
 PROCNO 1

F2 - Acquisition Parameters  
 Date\_ 20160816  
 Time\_ 15.47  
 INSTRUM spect  
 PROBHD 5 mm PABBO BB/  
 PULPROG zg30  
 TD 65536  
 SOLVENT CDC13  
 NS 16  
 DS 2  
 SWH 8012.820 Hz  
 FIDRES 0.122266 Hz  
 AQ 4.0894465 sec  
 RG 54.59  
 DW 62.400 usec  
 DE 6.50 usec  
 TE 299.0 K  
 D1 1.00000000 sec  
 TD0 1

===== CHANNEL f1 =====  
 SFO1 400.1324710 MHz  
 NUC1 1H  
 P1 15.00 usec  
 PLW1 8.00000000 W

F2 - Processing parameters  
 SI 65536  
 SF 400.1300091 MHz  
 WDW EM  
 SSB 0  
 LB 0.30 Hz  
 GB 0  
 PC 1.00

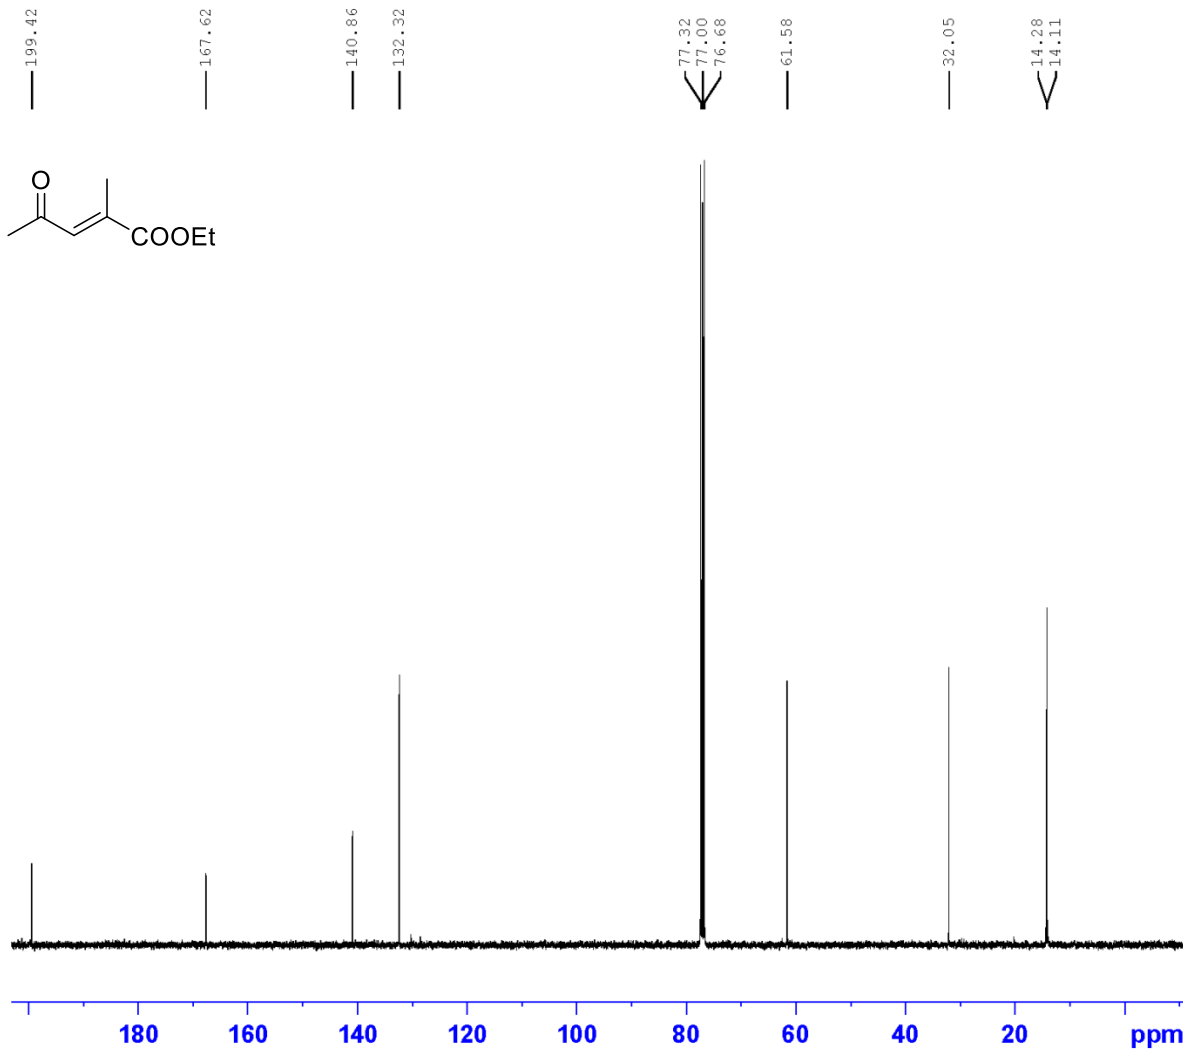

Current Data Parameters  
 NAME YF-16-0816-S8-C  
 EXPNO 10  
 PROCNO 1

F2 - Acquisition Parameters  
 Date\_ 20160817  
 Time\_ 15.16  
 INSTRUM spect  
 PROBHD 5 mm PABBO BB/  
 PULPROG zgpg30  
 TD 65536  
 SOLVENT CDCl3  
 NS 1024  
 DS 4  
 SWH 24038.461 Hz  
 FIDRES 0.366798 Hz  
 AQ 1.3631488 sec  
 RG 195.88  
 DW 20.800 usec  
 DE 6.50 usec  
 TE 299.9 K  
 D1 2.00000000 sec  
 D11 0.03000000 sec  
 TD0 1

==== CHANNEL f1 =====  
 SFO1 100.6228293 MHz  
 NUC1 13C  
 P1 10.00 usec  
 PLW1 70.00000000 W

==== CHANNEL f2 =====  
 SFO2 400.1316005 MHz  
 NUC2 1H  
 CPDPRG[2] waltz16  
 PCPD2 80.00 usec  
 PLW2 8.00000000 W  
 PLW12 0.28125000 W  
 PLW13 0.28125000 W

F2 - Processing parameters  
 SI 32768  
 SF 100.6127706 MHz  
 WDW EM  
 SSB 0  
 LB 1.00 Hz  
 GB 0  
 PC 1.40

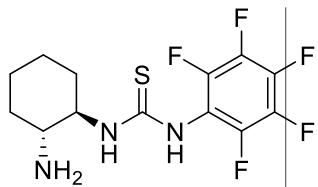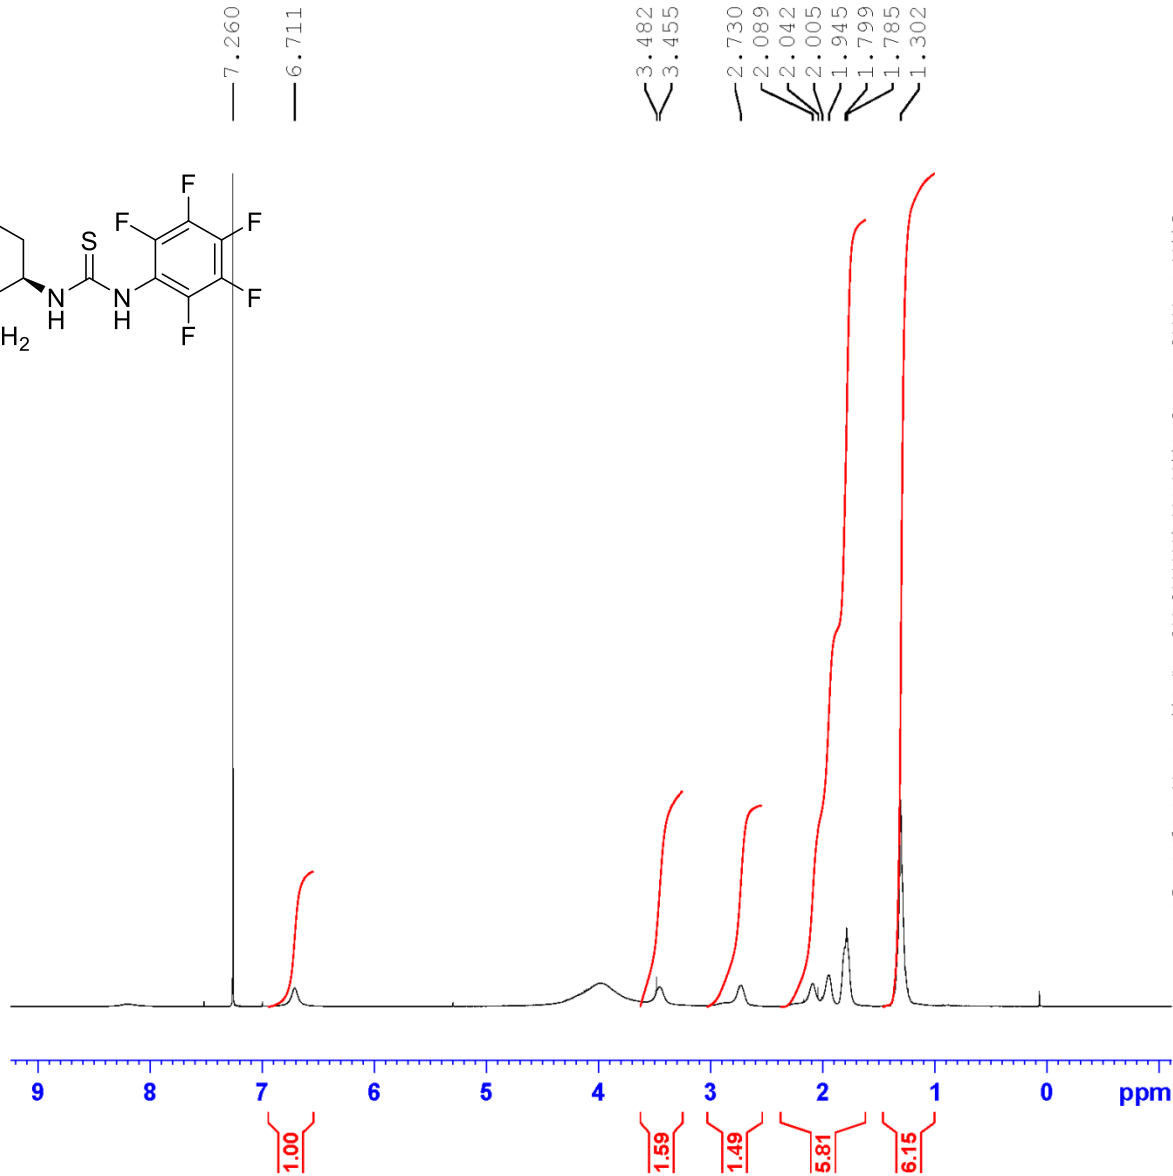

Current Data Parameters  
 NAME yf-16-1122-c7  
 EXPNO 10  
 PROCNO 1

F2 - Acquisition Parameters  
 Date\_ 20161122  
 Time\_ 16.10  
 INSTRUM spect  
 PROBHD 5 mm PABBO BB/  
 PULPROG zg30  
 TD 65536  
 SOLVENT CDC13  
 NS 16  
 DS 2  
 SWH 8012.820 Hz  
 FIDRES 0.122266 Hz  
 AQ 4.0894465 sec  
 RG 77.81  
 DW 62.400 usec  
 DE 6.50 usec  
 TE 298.4 K  
 D1 1.00000000 sec  
 TD0 1

==== CHANNEL f1 =====  
 SFO1 400.1324710 MHz  
 NUC1 1H  
 P1 15.00 usec  
 PLW1 7.50000000 W

F2 - Processing parameters  
 SI 65536  
 SF 400.1300096 MHz  
 WDW EM  
 SSB 0  
 LB 0.30 Hz  
 GB 0  
 PC 1.00

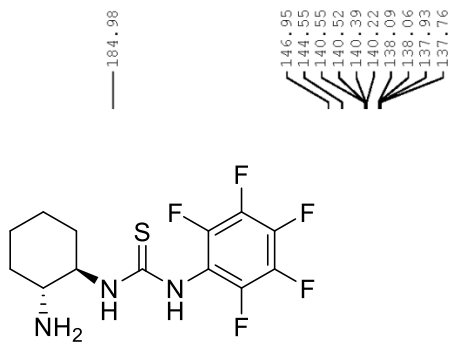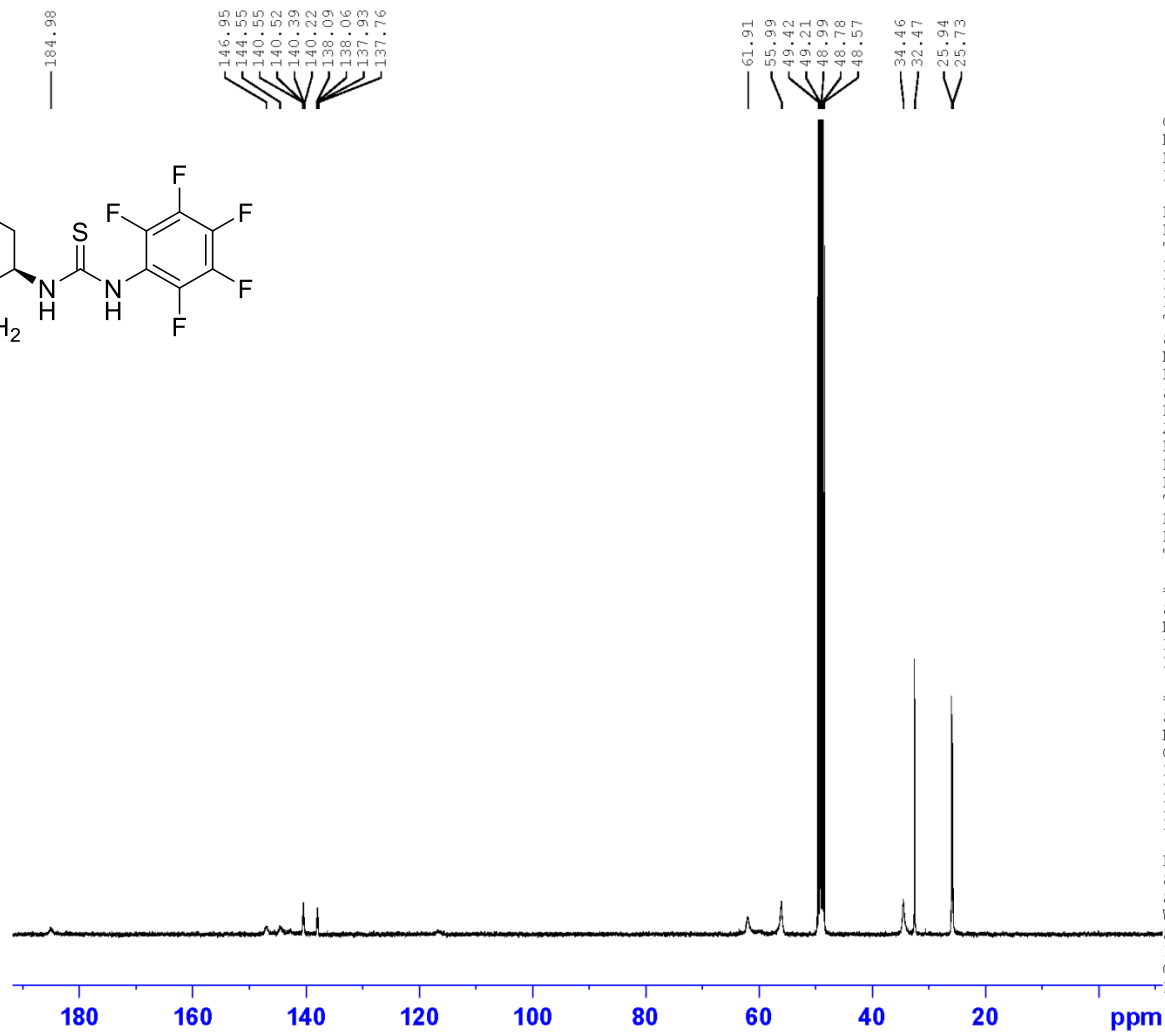

Current Data Parameters  
 NAME YF-17-0125-C7-C  
 EXPNO 10  
 PROCNO 1

F2 - Acquisition Parameters  
 Date\_ 20170125  
 Time\_ 8.35  
 INSTRUM spect  
 PROBHD 5 mm PABBO BB/  
 PULPROG zgpg30  
 TD 65536  
 SOLVENT CD3OD\_SFE  
 NS 8000  
 DS 4  
 SWH 24038.461 Hz  
 FIDRES 0.366798 Hz  
 AQ 1.3631488 sec  
 RG 195.88  
 DW 20.800 usec  
 DE 6.50 usec  
 TE 299.4 K  
 D1 2.0000000 sec  
 D11 0.0300000 sec  
 TD0 1

===== CHANNEL f1 =====  
 SFO1 100.6228293 MHz  
 NUC1 13C  
 P1 10.00 usec  
 PLW1 72.0000000 W

===== CHANNEL f2 =====  
 SFO2 400.1316005 MHz  
 NUC2 1H  
 CPDPRG[2] waltz16  
 PCPD2 80.00 usec  
 PLW2 7.5000000 W  
 PLW12 0.26367000 W  
 PLW13 0.16633999 W

F2 - Processing parameters  
 SI 32768  
 SF 100.6126284 MHz  
 WDW EM  
 SSB 0  
 LB 1.00 Hz  
 GB 0  
 PC 1.40



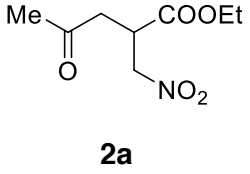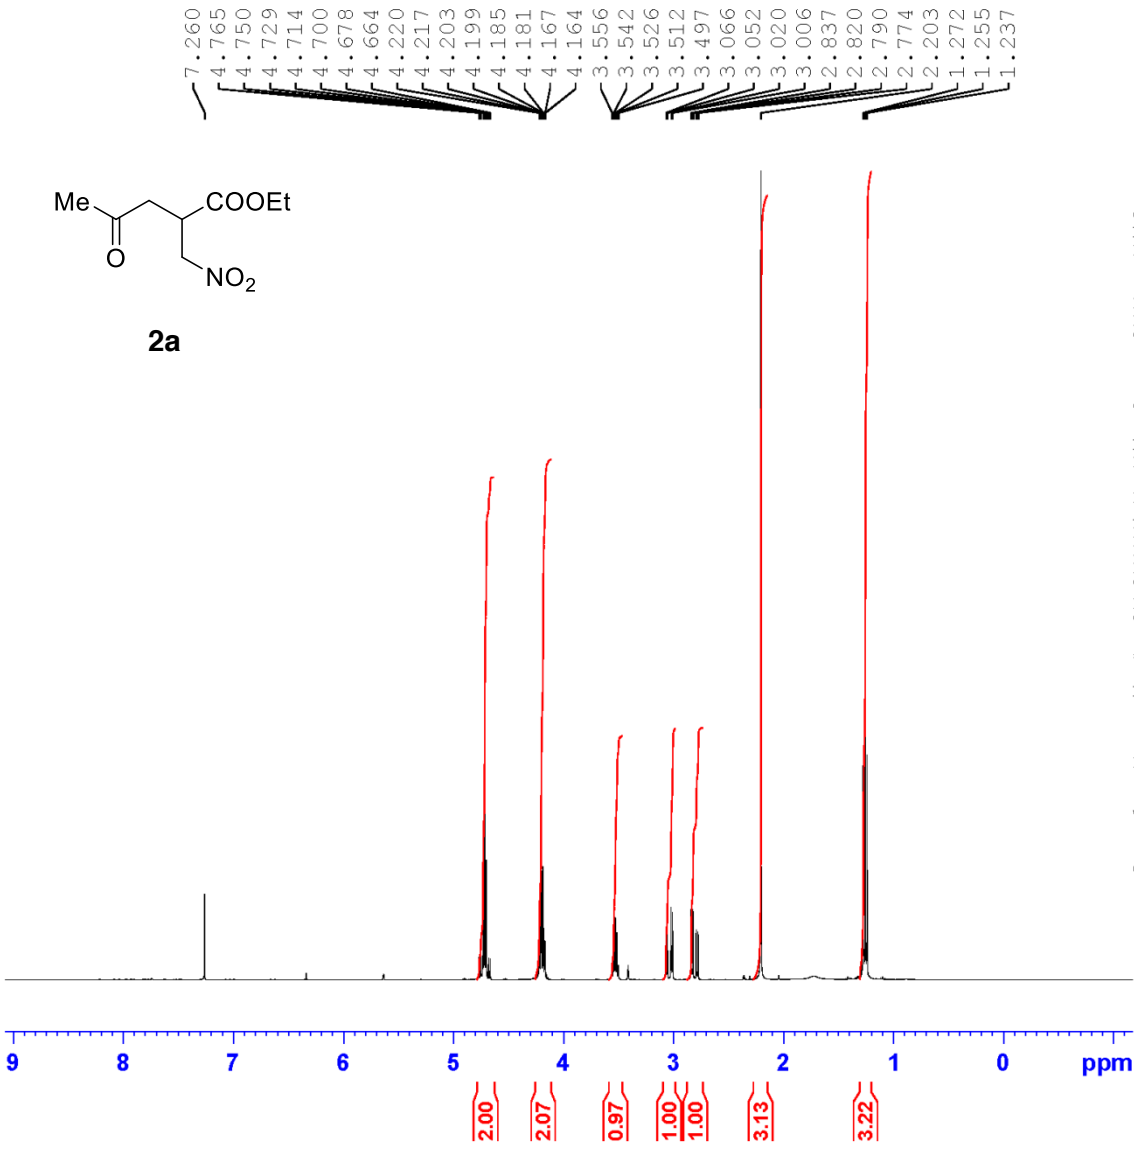

```

Current Data Parameters
NAME      yf-16-0222-414
EXPNO     1
PROCNO    1

F2 - Acquisition Parameters
Date_     20160222
Time      14.49
INSTRUM   spect
PROBHD    5 mm PABBO BB/
PULPROG   zg30
TD         65536
SOLVENT   CDC13
NS         16
DS         2
SWH        8012.820 Hz
FIDRES     0.122266 Hz
AQ         4.089465 sec
RG         54.59
DW         62.400 usec
DE         6.50 usec
TE         300.2 K
D1         1.00000000 sec
TD0        1

===== CHANNEL f1 =====
SFO1      400.1324710 MHz
NUC1       1H
P1         15.00 usec
PLW1       8.00000000 W

F2 - Processing parameters
SI         65536
SF         400.1300095 MHz
WDW        EM
SSB        0
LB         0.30 Hz
GB         0
PC         1.00
  
```

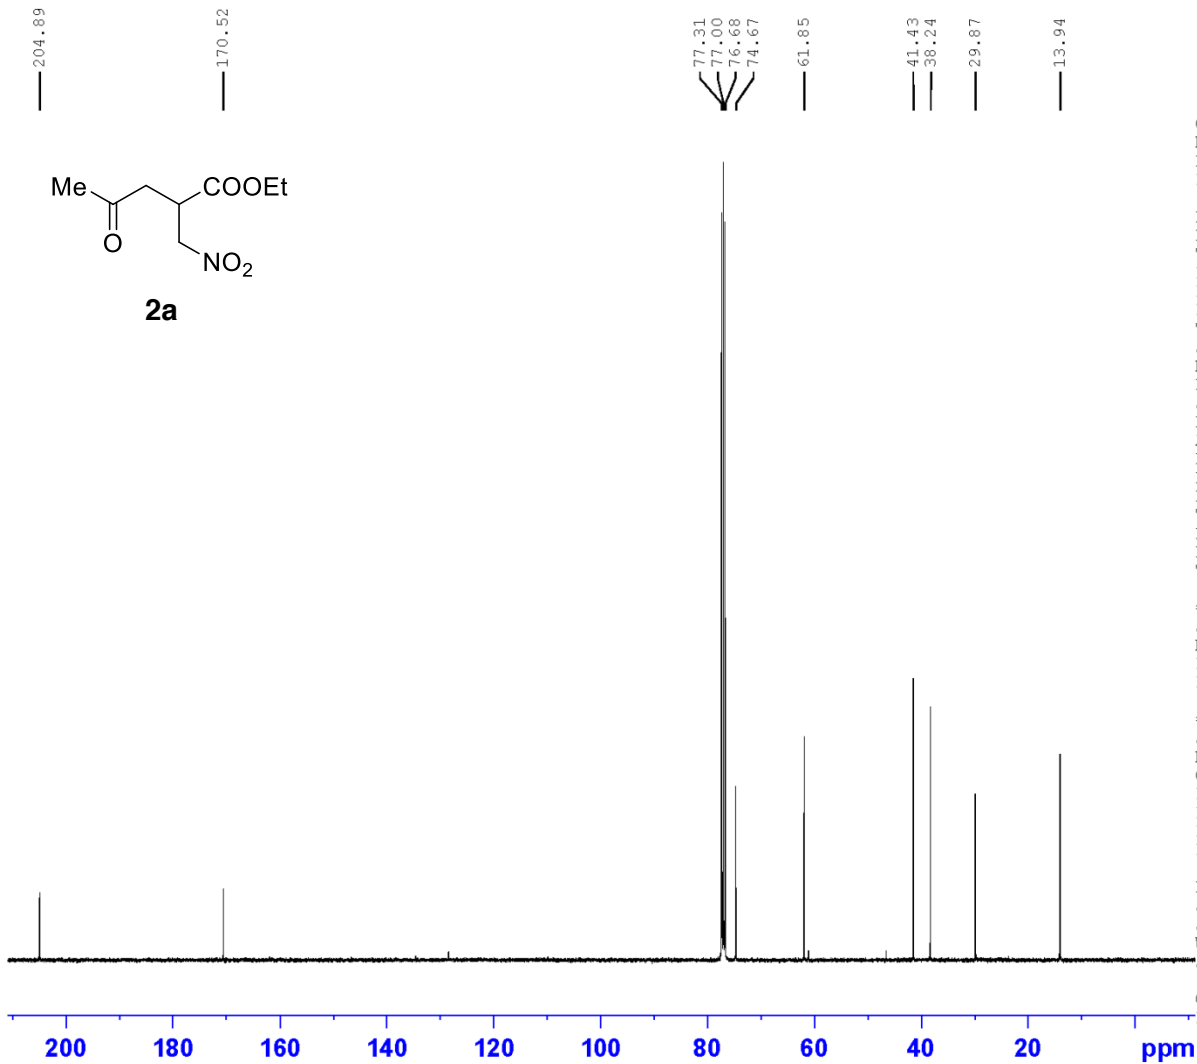

Current Data Parameters  
 NAME yf-16-0303-414c  
 EXPNO 10  
 PROCNO 1

F2 - Acquisition Parameters  
 Date\_ 20160304  
 Time\_ 2.33  
 INSTRUM spect  
 PROBHD 5 mm PABBO BB/  
 PULPROG zgpg30  
 TD 65536  
 SOLVENT CDCl3  
 NS 4096  
 DS 4  
 SWH 24038.461 Hz  
 FIDRES 0.366798 Hz  
 AQ 1.3631488 sec  
 RG 195.88  
 DW 20.800 usec  
 DE 6.50 usec  
 TE 302.0 K  
 D1 2.00000000 sec  
 D11 0.03000000 sec  
 TD0 1

==== CHANNEL f1 =====  
 SFO1 100.6228293 MHz  
 NUC1 13C  
 P1 10.00 usec  
 PLW1 70.00000000 W

==== CHANNEL f2 =====  
 SFO2 400.1316005 MHz  
 NUC2 1H  
 CPDPRG[2] waltz16  
 PCPD2 80.00 usec  
 PLW2 8.00000000 W  
 PLW12 0.28125000 W  
 PLW13 0.28125000 W

F2 - Processing parameters  
 SI 32768  
 SF 100.6127685 MHz  
 WDW EM  
 SSB 0  
 LB 1.00 Hz  
 GB 0  
 PC 1.40

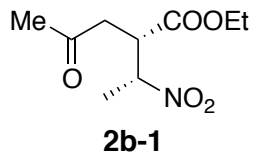

7.260  
 4.985  
 4.968  
 4.953  
 4.937  
 4.920  
 4.237  
 4.228  
 4.219  
 4.210  
 4.201  
 4.192  
 4.184  
 4.174  
 4.166  
 4.157  
 3.459  
 3.450  
 3.445  
 3.435  
 3.426  
 3.421  
 3.412  
 3.081  
 3.057  
 3.036  
 3.012  
 2.552  
 2.543  
 2.507  
 2.498  
 2.212  
 2.112  
 1.577  
 1.560  
 1.288  
 1.270  
 1.253

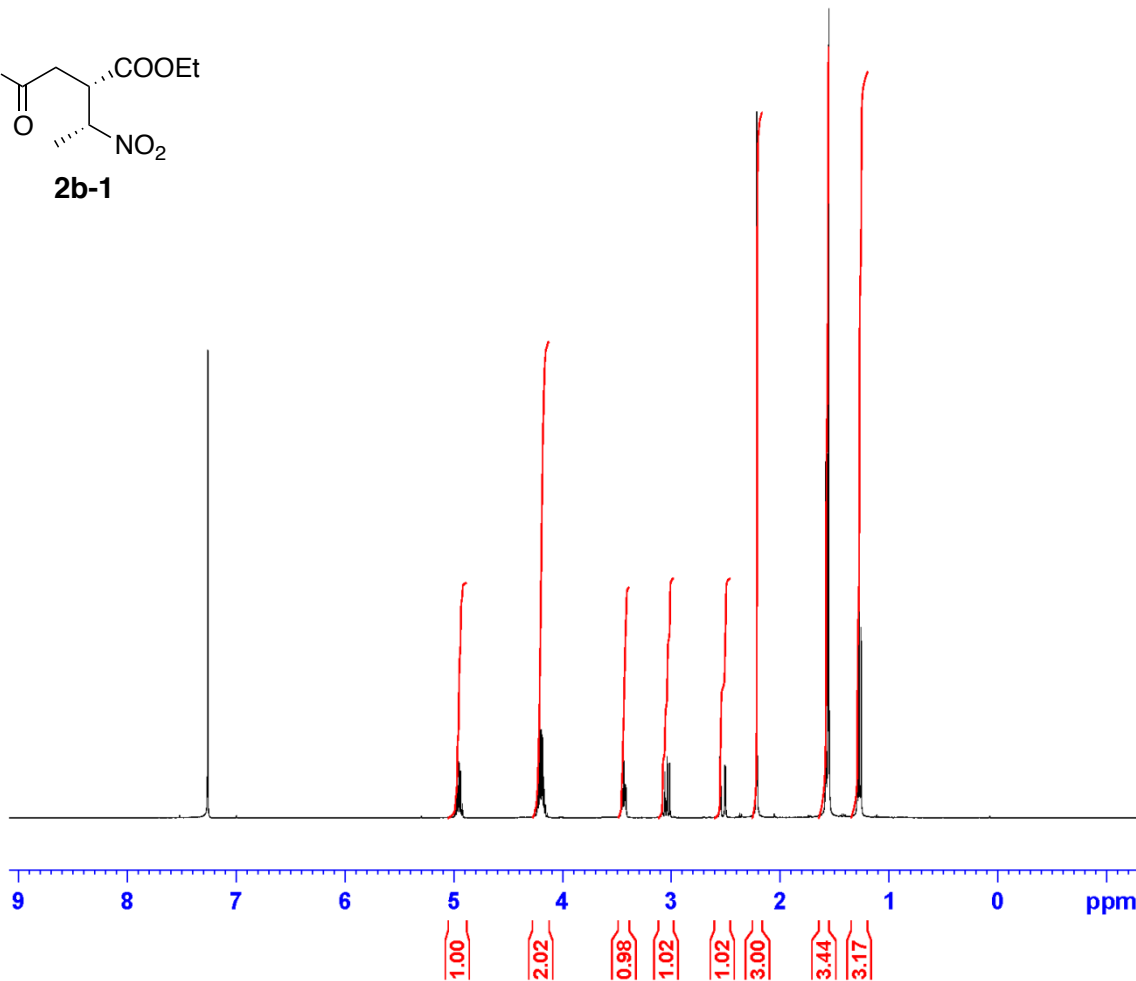

Current Data Parameters  
 NAME yf-16-0407-521-9  
 EXPNO 10  
 PROCNO 1  
  
 F2 - Acquisition Parameters  
 Date\_ 20160407  
 Time\_ 16.05  
 INSTRUM spect  
 PROBHD 5 mm PABBO BB/  
 PULPROG zg30  
 TD 65536  
 SOLVENT CDC13  
 NS 16  
 DS 2  
 SWH 8012.820 Hz  
 FIDRES 0.122266 Hz  
 AQ 4.0894465 sec  
 RG 88.94  
 DW 62.400 usec  
 DE 6.50 usec  
 TE 300.2 K  
 D1 1.00000000 sec  
 TD0 1  
  
 ===== CHANNEL f1 =====  
 SFO1 400.1324710 MHz  
 NUC1 1H  
 P1 15.00 usec  
 PLW1 8.00000000 W  
  
 F2 - Processing parameters  
 SI 65536  
 SF 400.1300095 MHz  
 WDW EM  
 SSB 0  
 LB 0.30 Hz  
 GB 0  
 PC 1.00

204.88  
170.55

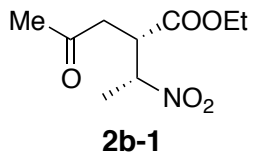

82.48  
77.31  
77.00  
76.68  
61.77  
44.20  
40.46  
29.93  
16.76  
13.98

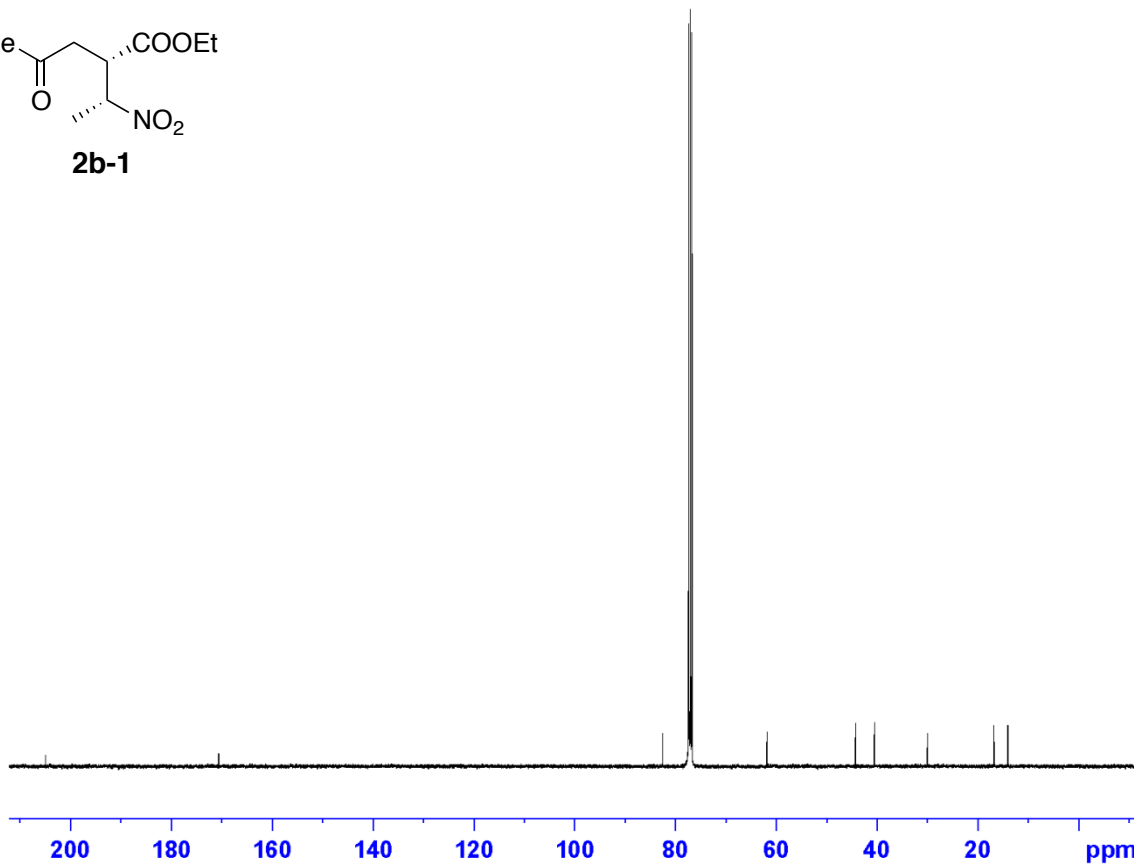

Current Data Parameters  
 NAME YF-16-0407-521-9-C  
 EXPNO 10  
 PROCNO 1

F2 - Acquisition Parameters  
 Date\_ 20160408  
 Time\_ 4.06  
 INSTRUM spect  
 PROBHD 5 mm PABBO BB/  
 PULPROG zgpg30  
 TD 65536  
 SOLVENT CDC13  
 NS 6000  
 DS 4  
 SWH 24038.461 Hz  
 FIDRES 0.366798 Hz  
 AQ 1.3631488 sec  
 RG 195.88  
 DW 20.800 usec  
 DE 6.50 usec  
 TE 301.9 K  
 D1 2.00000000 sec  
 D11 0.03000000 sec  
 TD0 1

=====  
 CHANNEL f1  
 SFO1 100.6228293 MHz  
 NUC1 13C  
 P1 10.00 usec  
 PLW1 70.00000000 W

=====  
 CHANNEL f2  
 SFO2 400.1316005 MHz  
 NUC2 1H  
 CPDPRG[2] waltz16  
 PCPD2 80.00 usec  
 PLW2 8.00000000 W  
 PLW12 0.28125000 W  
 PLW13 0.28125000 W

F2 - Processing parameters  
 SI 32768  
 SF 100.6127670 MHz  
 WDW EM  
 SSB 0  
 LB 1.00 Hz  
 GB 0  
 PC 1.40

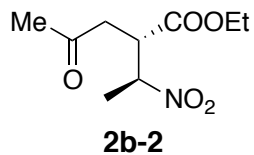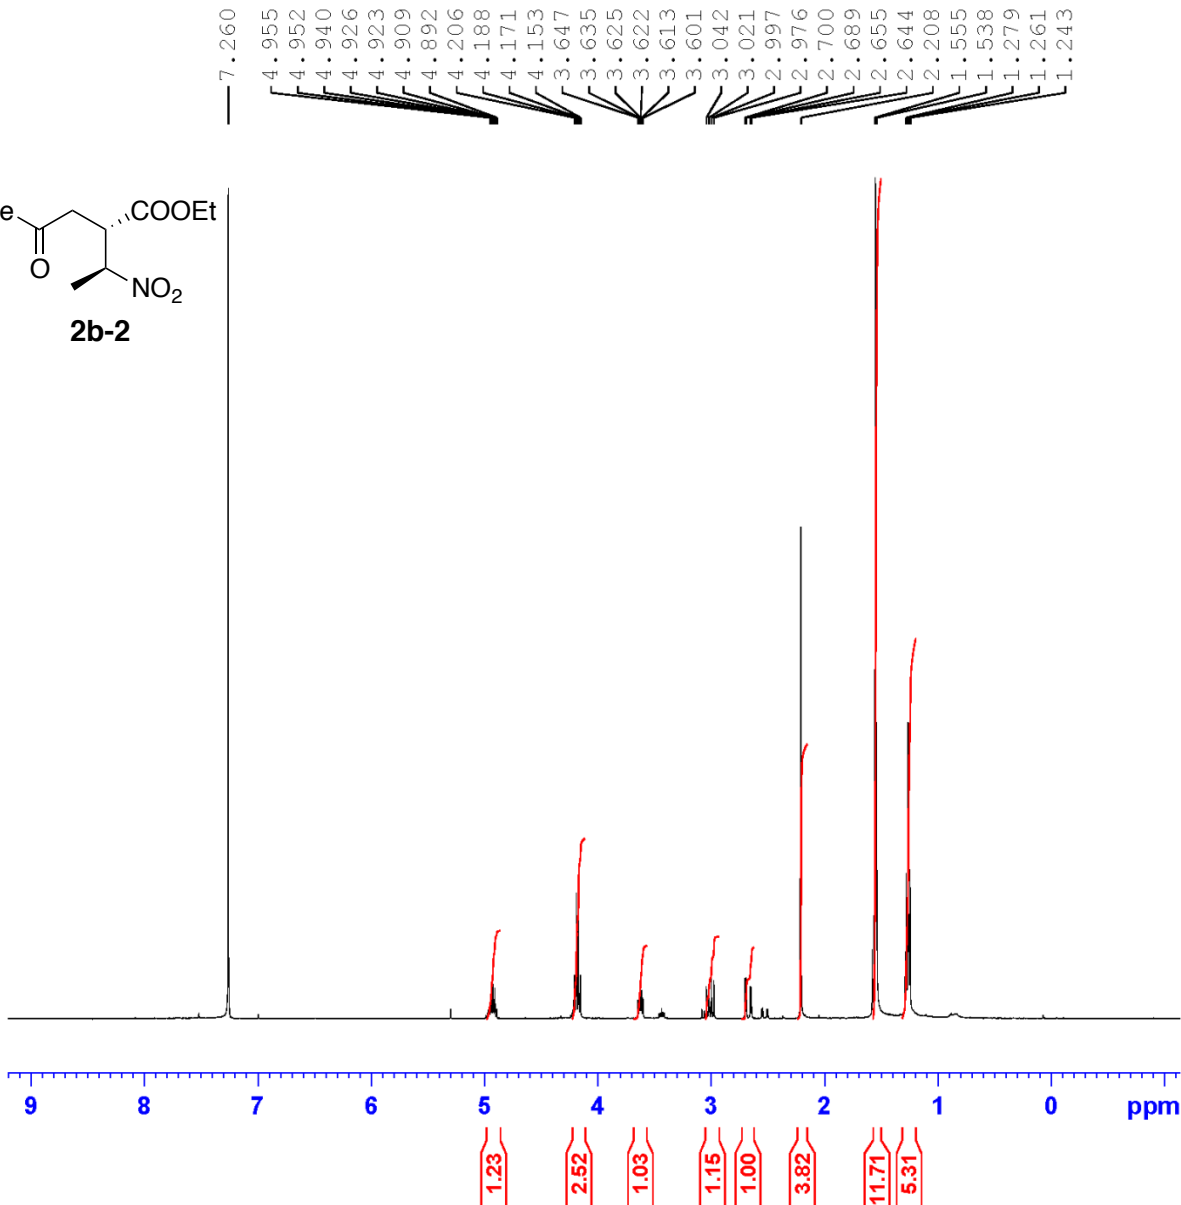

Current Data Parameters  
 NAME yf-16-0620-e3-11  
 EXPNO 10  
 PROCNO 1

F2 - Acquisition Parameters  
 Date\_ 20160620  
 Time\_ 11.58  
 INSTRUM spect  
 PROBHD 5 mm PABBO BB/  
 PULPROG zg30  
 TD 65536  
 SOLVENT CDCl3  
 NS 16  
 DS 2  
 SWH 8012.820 Hz  
 FIDRES 0.122266 Hz  
 AQ 4.0894465 sec  
 RG 98.39  
 DW 62.400 usec  
 DE 6.50 usec  
 TE 298.7 K  
 D1 1.00000000 sec  
 TD0 1

===== CHANNEL f1 =====  
 SFO1 400.1324710 MHz  
 NUC1 1H  
 P1 15.00 usec  
 PLW1 8.00000000 W

F2 - Processing parameters  
 SI 65536  
 SF 400.1300095 MHz  
 WDW EM  
 SSB 0  
 LB 0.30 Hz  
 GB 0  
 PC 1.00

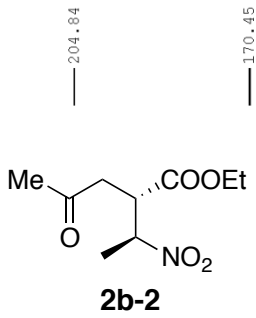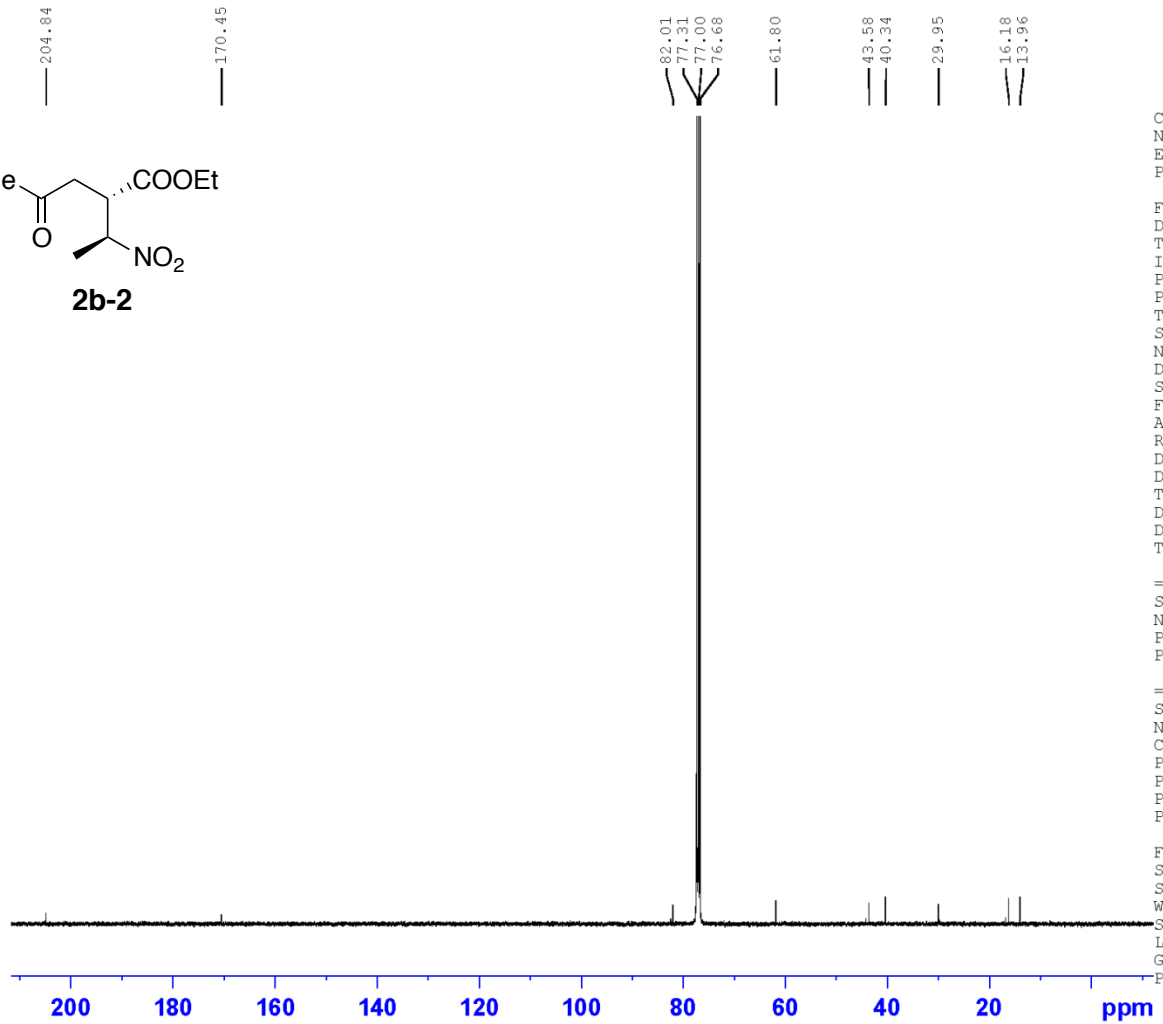

```

Current Data Parameters
NAME      YF-16-0707-E3-11C
EXPNO     10
PROCNO    1

F2 - Acquisition Parameters
Date_     20160708
Time      8.02
INSTRUM   spect
PROBHD    5 mm PABBO BB/
PULPROG   zgpg30
TD         65536
SOLVENT   CDCl3
NS         10000
DS         4
SWH        24038.461 Hz
FIDRES     0.366798 Hz
AQ         1.3631488 sec
RG         195.88
DW         20.800 usec
DE         6.50 usec
TE         300.4 K
D1         2.0000000 sec
D11        0.0300000 sec
TD0        1

===== CHANNEL f1 =====
SFO1      100.6228293 MHz
NUC1       13C
P1         10.00 usec
PLW1       70.0000000 W

===== CHANNEL f2 =====
SFO2      400.1316005 MHz
NUC2       1H
CPDPRG[2] waltz16
PCPD2      80.00 usec
PLW2       8.0000000 W
PLW12      0.2812500 W
PLW13      0.2812500 W

F2 - Processing parameters
SI         32768
SF         100.6127697 MHz
WDW        EM
SSB         0
LB          1.00 Hz
GB          0
PC          1.40
  
```

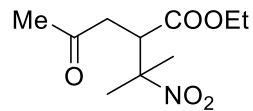

2c

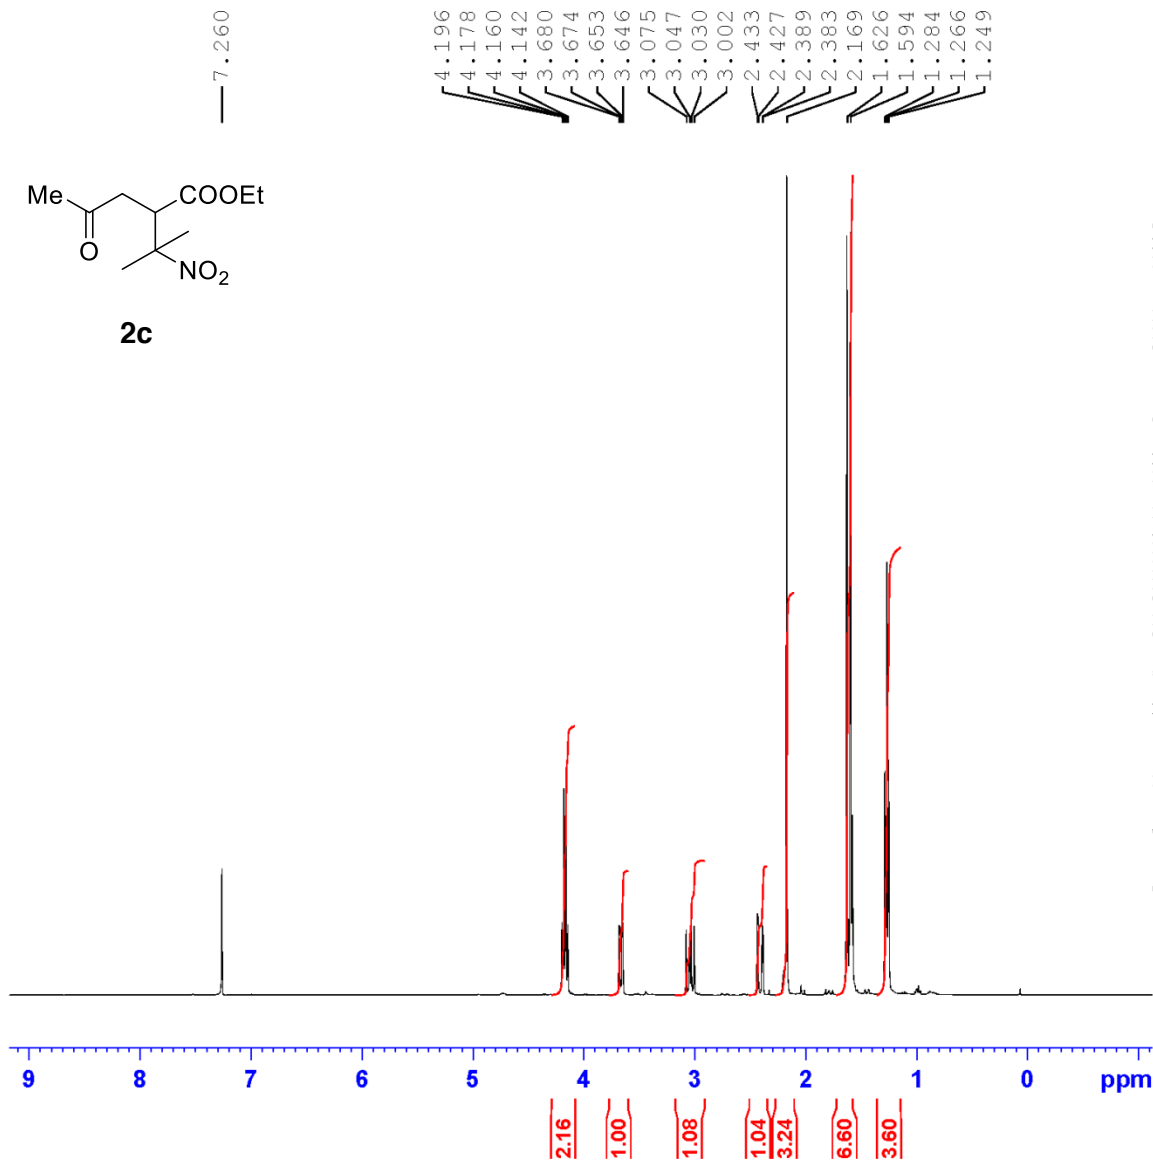

Current Data Parameters  
 NAME YF-16-0818-640P  
 EXPNO 10  
 PROCNO 1

F2 - Acquisition Parameters  
 Date 20160818  
 Time 18.01  
 INSTRUM spect  
 PROBHD 5 mm PABBO BB/  
 PULPROG zg30  
 TD 65536  
 SOLVENT CDCl3  
 NS 16  
 DS 2  
 SWH 8012.820 Hz  
 FIDRES 0.122266 Hz  
 AQ 4.0894465 sec  
 RG 62.88  
 DW 62.400 usec  
 DE 6.50 usec  
 TE 298.8 K  
 D1 1.00000000 sec  
 TD0 1

==== CHANNEL f1 =====  
 SFO1 400.1324710 MHz  
 NUC1 1H  
 P1 15.00 usec  
 PLW1 8.00000000 W

F2 - Processing parameters  
 SI 65536  
 SF 400.1300092 MHz  
 WDW EM  
 SSB 0  
 LB 0.30 Hz  
 GB 0  
 PC 1.00

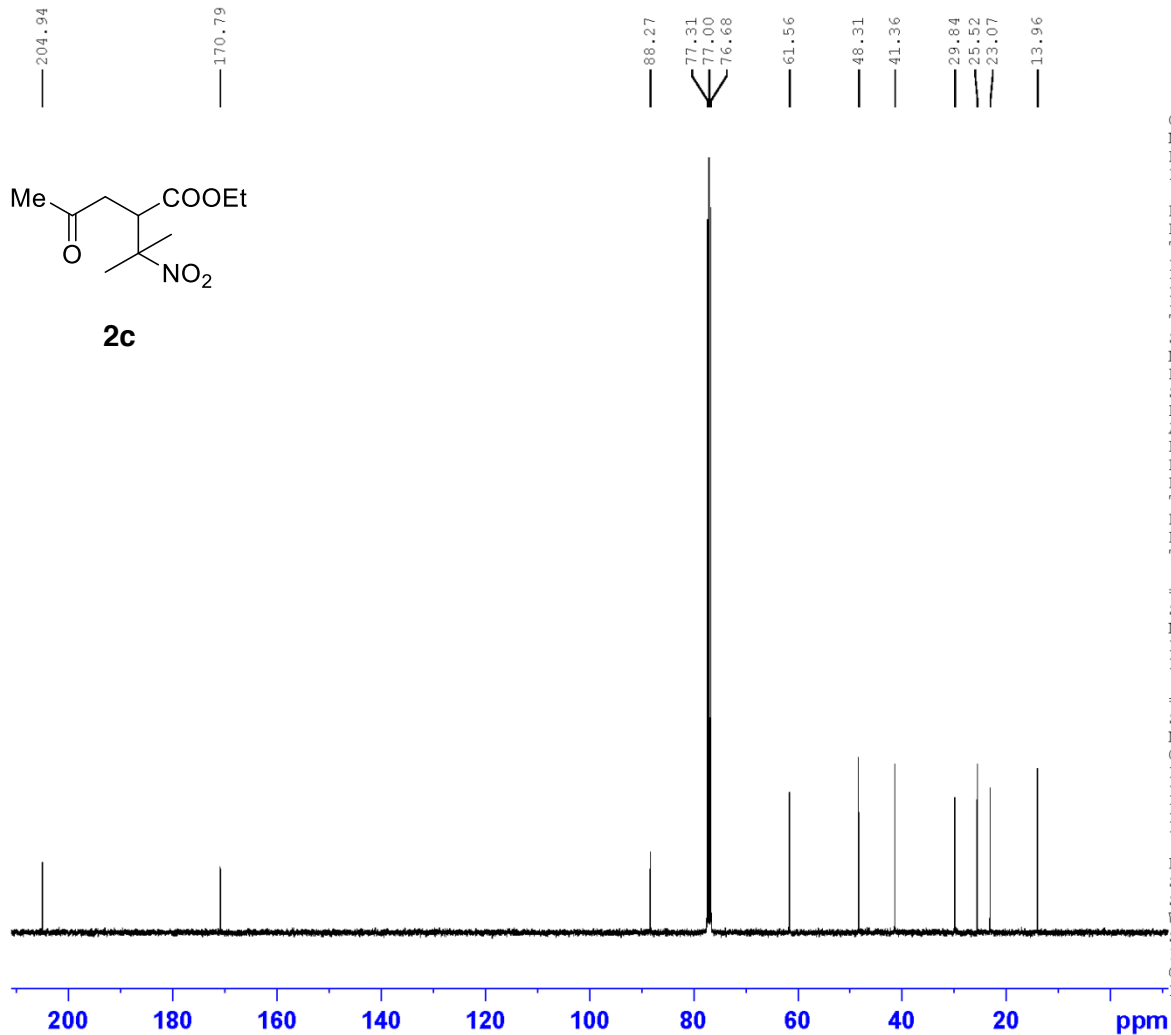

```

Current Data Parameters
NAME      YF-16-0818-640P-C
EXPNO     10
PROCNO    1

F2 - Acquisition Parameters
Date_     20160818
Time      21.48
INSTRUM   spect
PROBHD    5 mm PABBO BB/
PULPROG   zgpg30
TD         65536
SOLVENT   CDCl3
NS         1200
DS         4
SWH        24038.461 Hz
FIDRES     0.366798 Hz
AQ         1.3631488 sec
RG         195.88
DW         20.800 usec
DE         6.50 usec
TE         299.8 K
D1         2.00000000 sec
D11        0.03000000 sec
TD0        1

===== CHANNEL f1 =====
SFO1      100.6228293 MHz
NUC1       13C
P1         10.00 usec
PLW1       70.00000000 W

===== CHANNEL f2 =====
SFO2      400.1316005 MHz
NUC2       1H
CPDPRG[2] waltz16
PCPD2     80.00 usec
PLW2       8.00000000 W
PLW12     0.28125000 W
PLW13     0.28125000 W

F2 - Processing parameters
SI         32768
SF         100.6127706 MHz
WDW        EM
SSB        0
LB         1.00 Hz
GB         0
PC         1.40

```



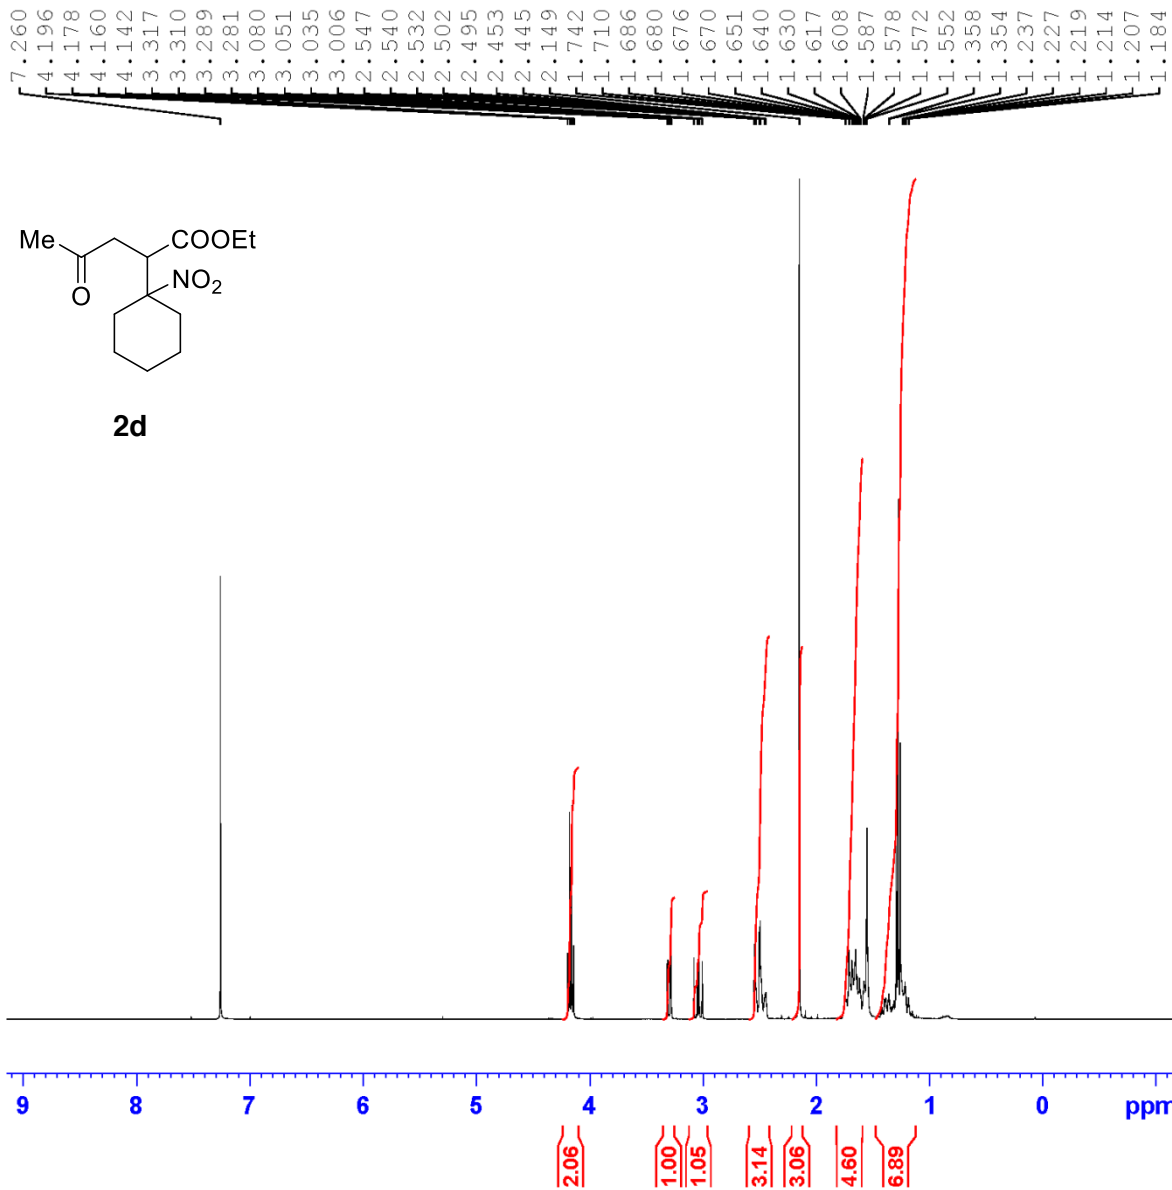

Current Data Parameters  
 NAME yf-16-0222-394  
 EXPNO 10  
 PROCNO 1

F2 - Acquisition Parameters  
 Date 20160222  
 Time 14.41  
 INSTRUM spect  
 PROBHD 5 mm PABBO BB/  
 PULPROG zg30  
 TD 65536  
 SOLVENT CDC13  
 NS 16  
 DS 2  
 SWH 8012.820 Hz  
 FIDRES 0.122266 Hz  
 AQ 4.0894465 sec  
 RG 77.81  
 DW 62.400 usec  
 DE 6.50 usec  
 TE 300.3 K  
 D1 1.00000000 sec  
 TD0 1

=====  
 CHANNEL f1 =====  
 SFO1 400.1324710 MHz  
 NUC1 1H  
 P1 15.00 usec  
 PLW1 8.00000000 W

F2 - Processing parameters  
 SI 65536  
 SF 400.1300095 MHz  
 WDW EM  
 SSB 0  
 LB 0.30 Hz  
 GB 0  
 FC 1.00

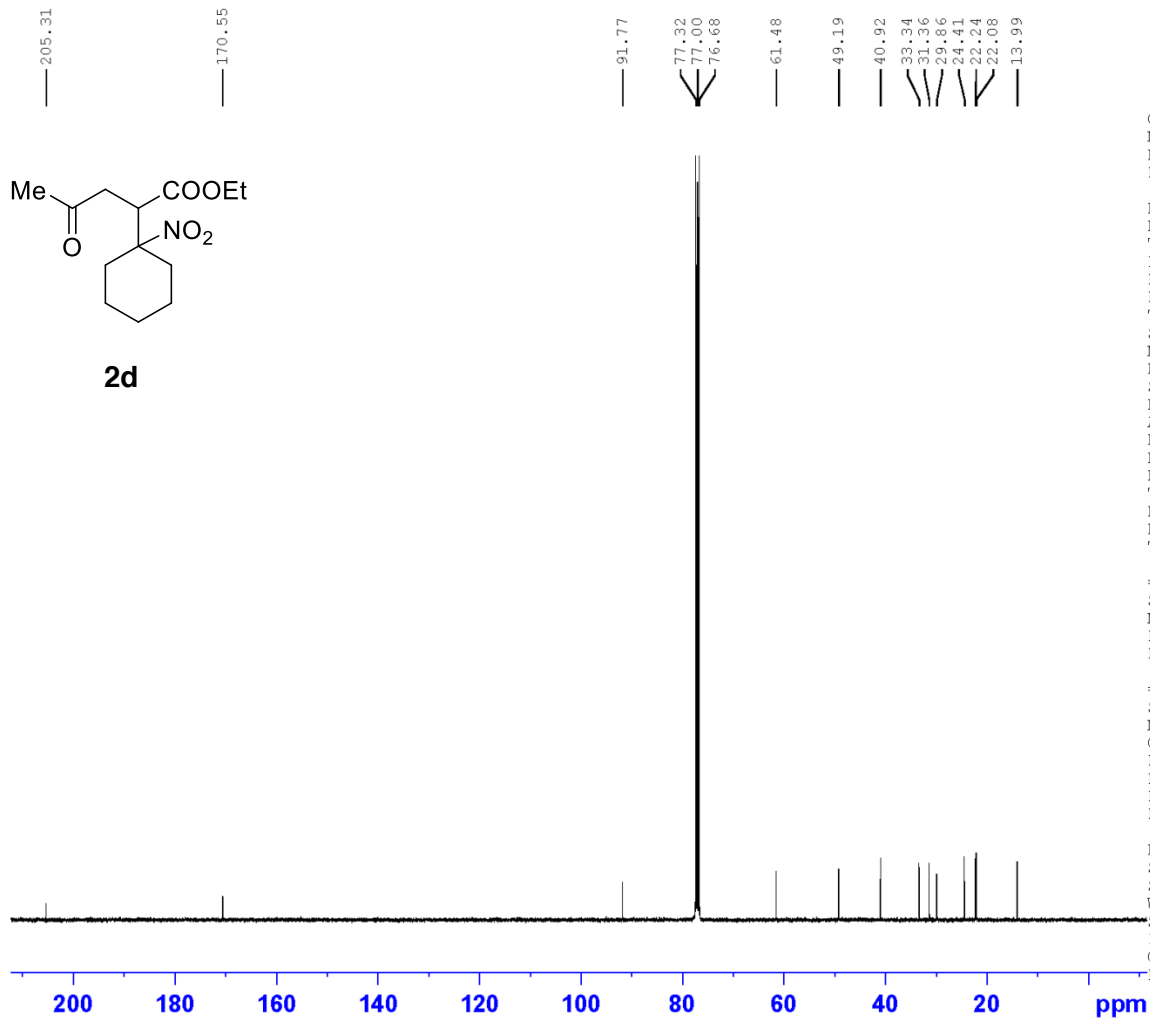

Current Data Parameters  
 NAME yf-16-0223-394c  
 EXPNO 10  
 PROCNO 1

F2 - Acquisition Parameters  
 Date\_ 20160224  
 Time\_ 3.07  
 INSTRUM spect  
 PROBHD 5 mm PABBO BB/  
 PULPROG zgpg30  
 TD 65536  
 SOLVENT CDCl3  
 NS 4096  
 DS 4  
 SWH 24038.461 Hz  
 FIDRES 0.366798 Hz  
 AQ 1.3631488 sec  
 RG 195.88  
 DW 20.800 usec  
 DE 6.50 usec  
 TE 302.2 K  
 D1 2.00000000 sec  
 D11 0.03000000 sec  
 TD0 1

===== CHANNEL f1 =====  
 SFO1 100.6228293 MHz  
 NUC1 13C  
 P1 10.00 usec  
 PLW1 70.00000000 W

===== CHANNEL f2 =====  
 SFO2 400.1316005 MHz  
 NUC2 1H  
 CPDPRG[2] waltz16  
 PCPD2 80.00 usec  
 PLW2 8.00000000 W  
 PLW12 0.28125000 W  
 PLW13 0.28125000 W

F2 - Processing parameters  
 SI 32768  
 SF 100.6127669 MHz  
 WDW EM  
 SSB 0  
 LB 1.00 Hz  
 GB 0  
 PC 1.40

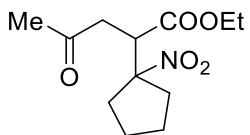

2e

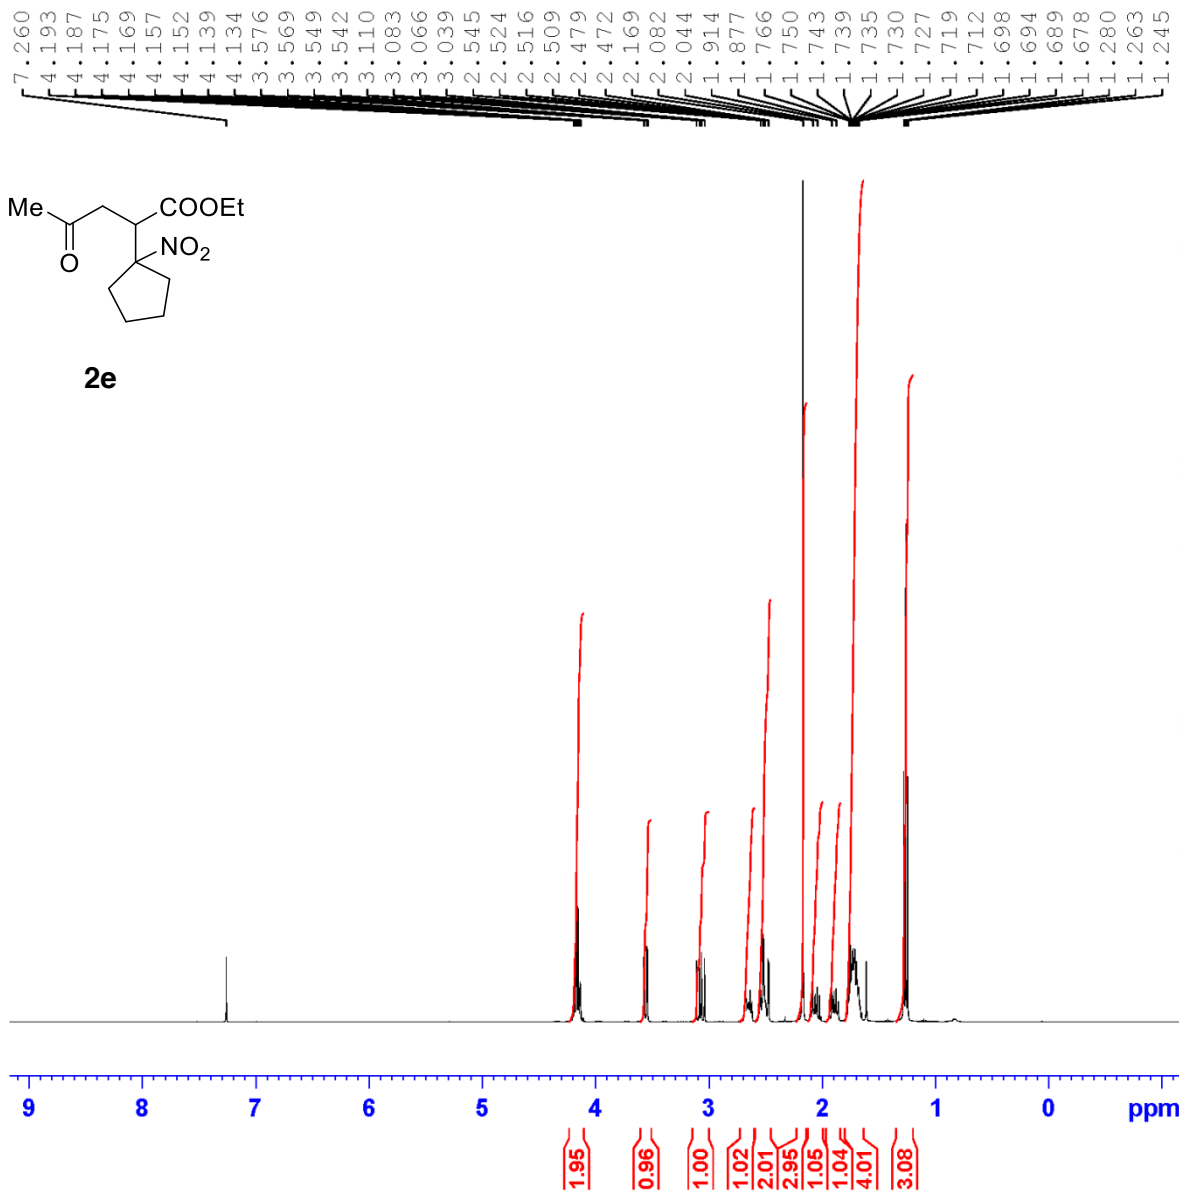

```

Current Data Parameters
NAME      yf-16-0222-400
EXPNO     10
PROCNO    1

F2 - Acquisition Parameters
Date_     20160222
Time      14.45
INSTRUM   spect
PROBHD    5 mm PABBO BB/
PULPROG   zg30
TD         65536
SOLVENT   CDC13
NS         16
DS         2
SWH        8012.820 Hz
FIDRES     0.122266 Hz
AQ         4.0894465 sec
RG         31.13
DW         62.400 usec
DE         6.50 usec
TE         300.2 K
D1         1.00000000 sec
TD0        1

===== CHANNEL f1 =====
SF01      400.1324710 MHz
NUC1       1H
P1         15.00 usec
PLW1       8.00000000 W

F2 - Processing parameters
SI         65536
SF         400.1300094 MHz
WDW        EM
SSB        0
LB         0.30 Hz
GB         0
PC         1.00
  
```

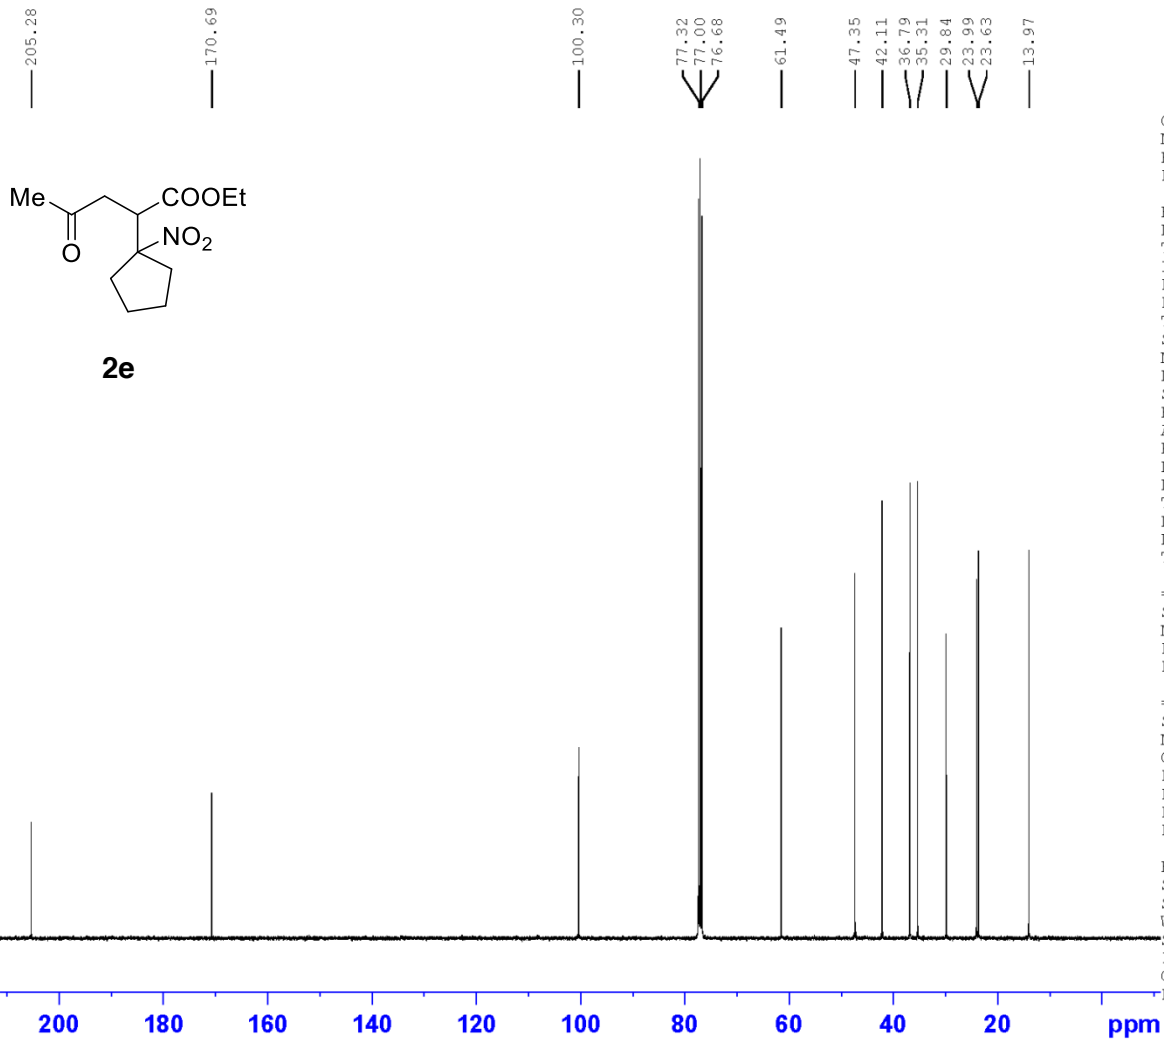

Current Data Parameters  
 NAME yf-16-0226-400c  
 EXPNO 10  
 PROCNO 1

F2 - Acquisition Parameters  
 Date\_ 20160227  
 Time\_ 2.16  
 INSTRUM spect  
 PROBHD 5 mm PABBO BB/  
 PULPROG zgpg30  
 TD 65536  
 SOLVENT CDCl3  
 NS 4096  
 DS 4  
 SWH 24038.461 Hz  
 FIDRES 0.366798 Hz  
 AQ 1.3631488 sec  
 RG 195.88  
 DW 20.800 usec  
 DE 6.50 usec  
 TE 302.1 K  
 D1 2.00000000 sec  
 D11 0.03000000 sec  
 TD0 1

==== CHANNEL f1 =====  
 SFO1 100.6228293 MHz  
 NUC1 13C  
 P1 10.00 usec  
 PLW1 70.00000000 W

==== CHANNEL f2 =====  
 SFO2 400.1316005 MHz  
 NUC2 1H  
 CPDPRG[2] waltz16  
 PCPD2 80.00 usec  
 PLW2 8.00000000 W  
 PLW12 0.28125000 W  
 PLW13 0.28125000 W

F2 - Processing parameters  
 SI 32768  
 SF 100.6127691 MHz  
 WDW EM  
 SSB 0  
 LB 1.00 Hz  
 GB 0  
 PC 1.40

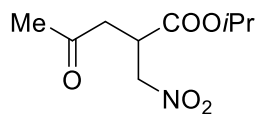

**2f**

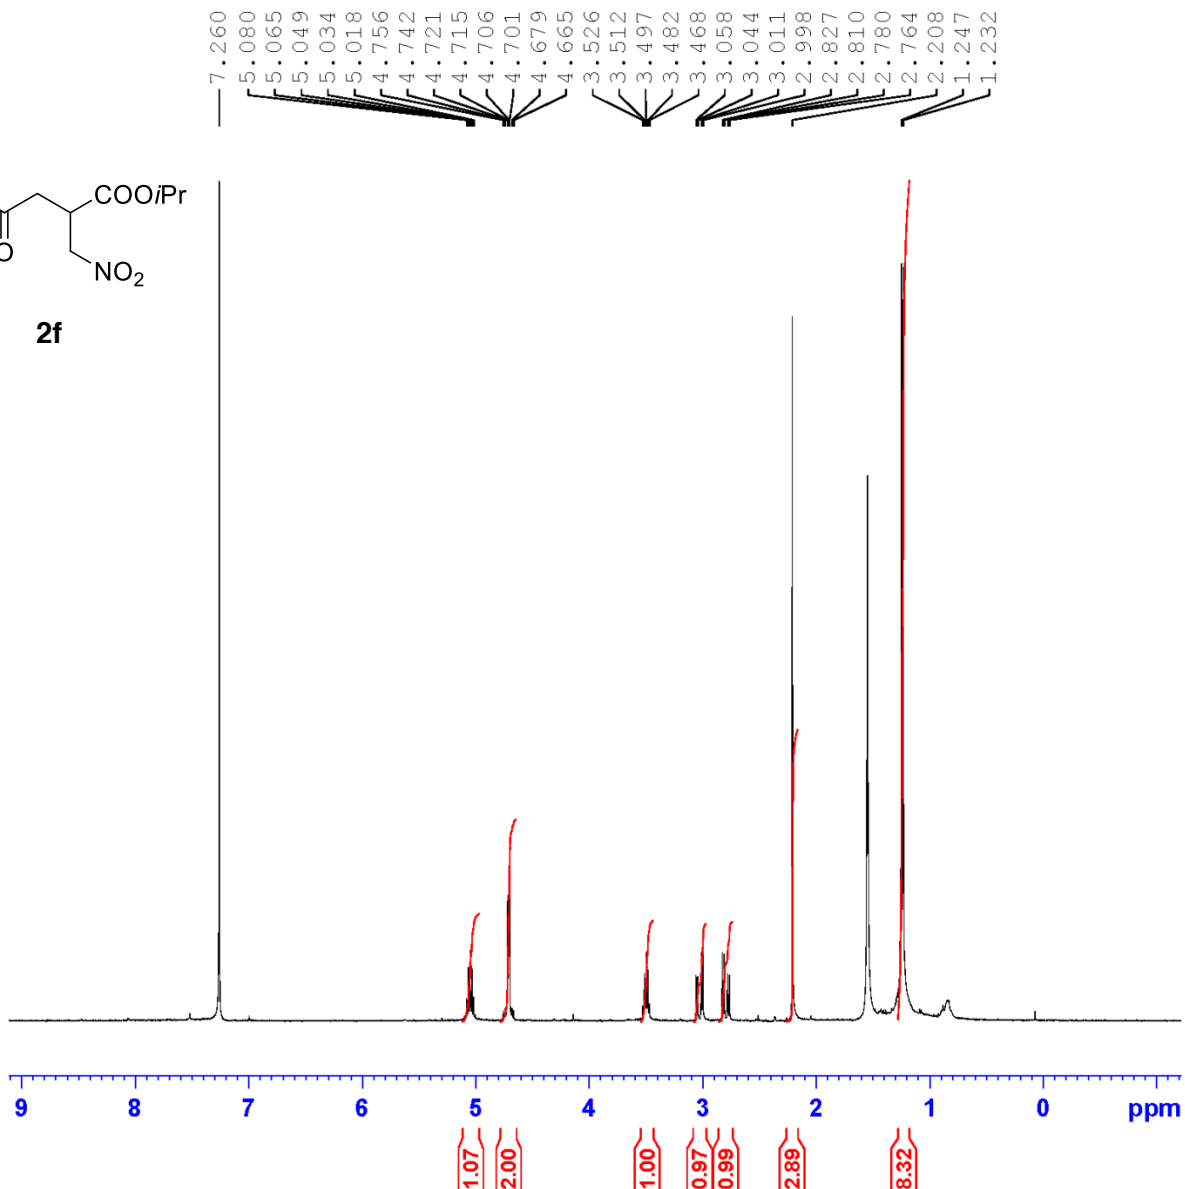

Current Data Parameters  
 NAME YF-16-0401-463P-H  
 EXPNO 10  
 PROCNO 1

F2 - Acquisition Parameters  
 Date\_ 20160401  
 Time\_ 14.42  
 INSTRUM spect  
 PROBHD 5 mm PABBO BB/  
 PULPROG zg30  
 TD 65536  
 SOLVENT CDCl3  
 NS 16  
 DS 2  
 SWH 8012.820 Hz  
 FIDRES 0.122266 Hz  
 AQ 4.0894465 sec  
 RG 88.94  
 DW 62.400 usec  
 DE 6.50 usec  
 TE 300.3 K  
 D1 1.00000000 sec  
 TD0 1

===== CHANNEL f1 =====  
 SFO1 400.1324710 MHz  
 NUC1 1H  
 P1 15.00 usec  
 PLW1 8.00000000 W

F2 - Processing parameters  
 SI 65536  
 SF 400.1300096 MHz  
 WDW EM  
 SSB 0  
 LB 0.30 Hz  
 GB 0  
 PC 1.00

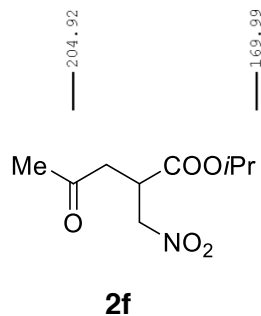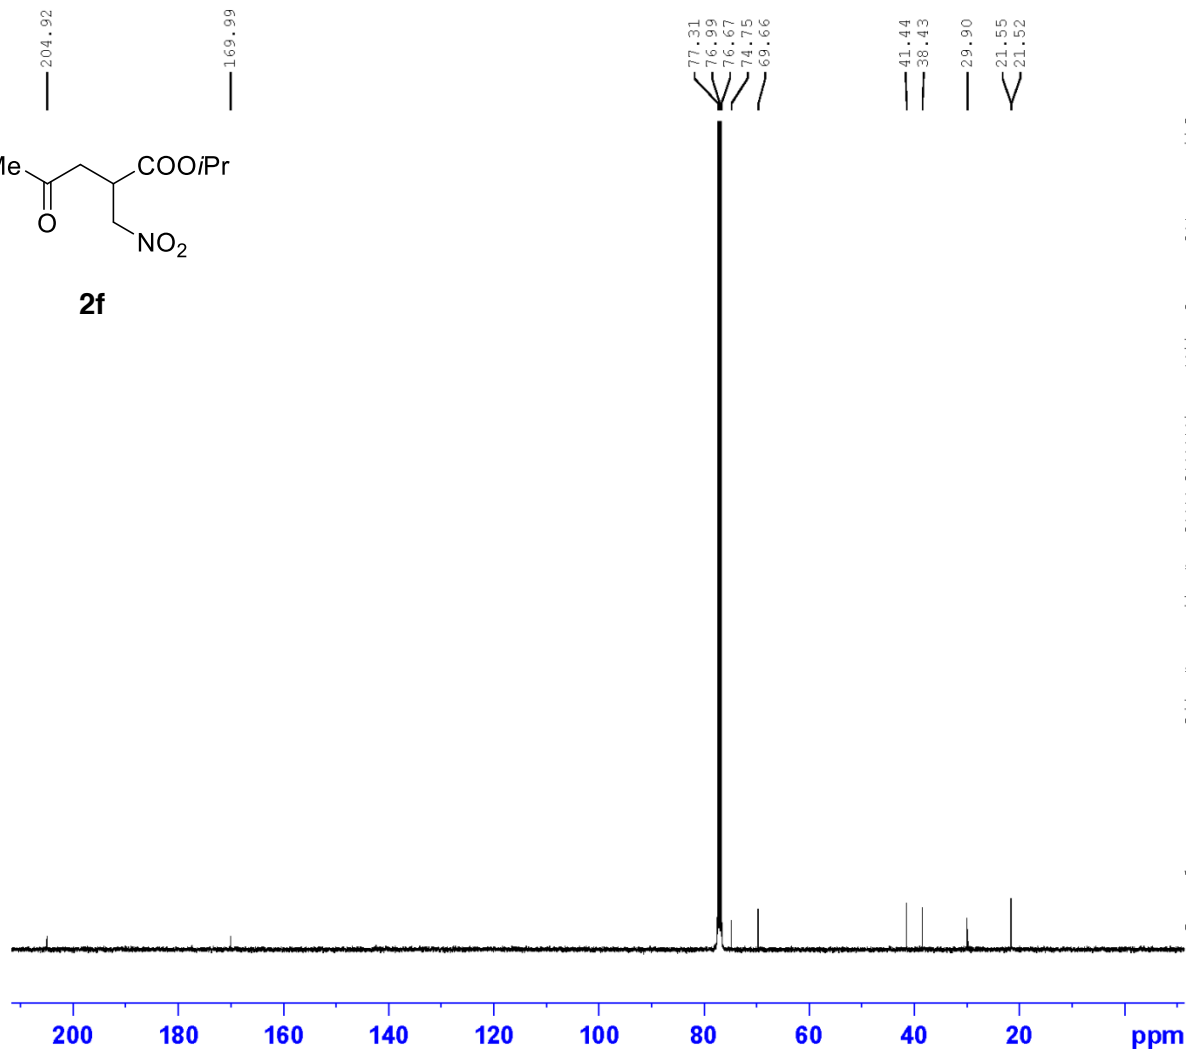

Current Data Parameters  
 NAME YF-16-0401-463IPR-P-C  
 EXPNO 10  
 PROCNO 1

F2 - Acquisition Parameters  
 Date\_ 20160402  
 Time\_ 7.53  
 INSTRUM spect  
 PROBHD 5 mm PABBO BB/  
 PULPROG zgpg30  
 TD 65536  
 SOLVENT CDCl3  
 NS 10000  
 DS 4  
 SWH 24038.461 Hz  
 FIDRES 0.366798 Hz  
 AQ 1.3631488 sec  
 RG 195.88  
 DW 20.800 usec  
 DE 6.50 usec  
 TE 302.0 K  
 D1 2.00000000 sec  
 D11 0.03000000 sec  
 TDO 1

===== CHANNEL f1 =====  
 SFO1 100.6228293 MHz  
 NUC1 13C  
 P1 10.00 usec  
 PLW1 70.00000000 W

===== CHANNEL f2 =====  
 SFO2 400.1316005 MHz  
 NUC2 1H  
 CPDPRG[2] waltz16  
 PCPD2 80.00 usec  
 PLW2 8.00000000 W  
 PLW12 0.28125000 W  
 PLW13 0.28125000 W

F2 - Processing parameters  
 SI 32768  
 SF 100.6127676 MHz  
 WDW EM  
 SSB 0  
 LB 1.00 Hz  
 GB 0  
 PC 1.40

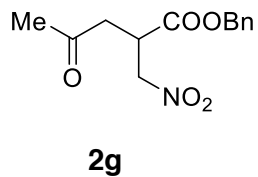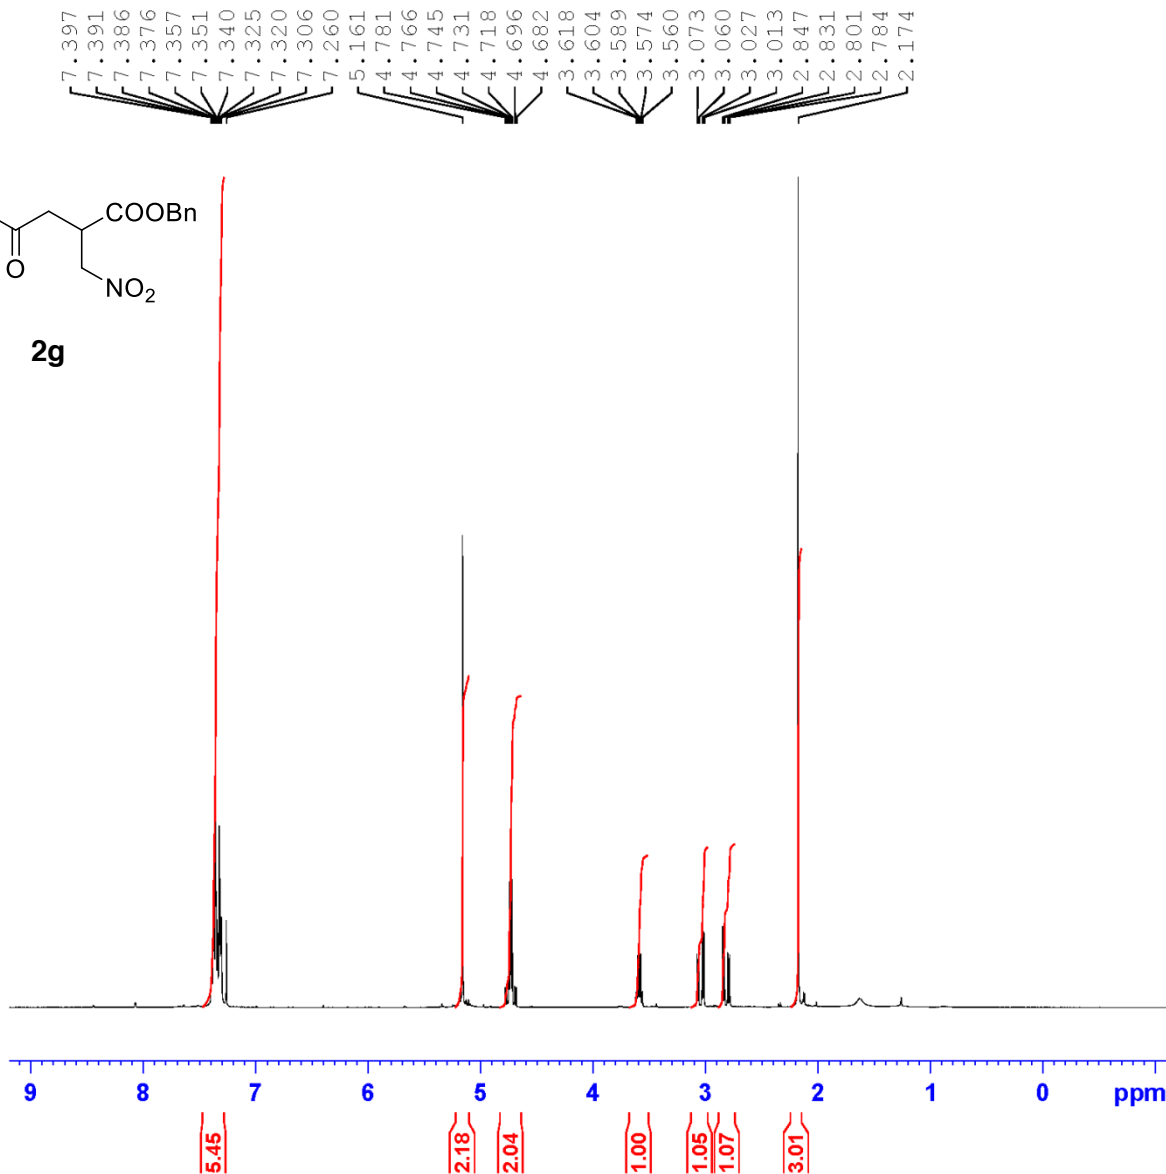

Current Data Parameters  
 NAME YF-16-0401-BN-P-H  
 EXPNO 10  
 PROCNO 1

F2 - Acquisition Parameters  
 Date\_ 20160401  
 Time\_ 14.46  
 INSTRUM spect  
 PROBHD 5 mm PABBO BB/  
 PULPROG zg30  
 TD 65536  
 SOLVENT CDCl3  
 NS 16  
 DS 2  
 SWH 8012.820 Hz  
 FIDRES 0.122266 Hz  
 AQ 4.0894465 sec  
 RG 54.59  
 DW 62.400 usec  
 DE 6.50 usec  
 TE 300.2 K  
 D1 1.00000000 sec  
 TD0 1

===== CHANNEL f1 =====  
 SFO1 400.1324710 MHz  
 NUC1 1H  
 P1 15.00 usec  
 PLW1 8.00000000 W

F2 - Processing parameters  
 SI 65536  
 SF 400.1300094 MHz  
 WDW EM  
 SSB 0  
 LB 0.30 Hz  
 GB 0  
 PC 1.00

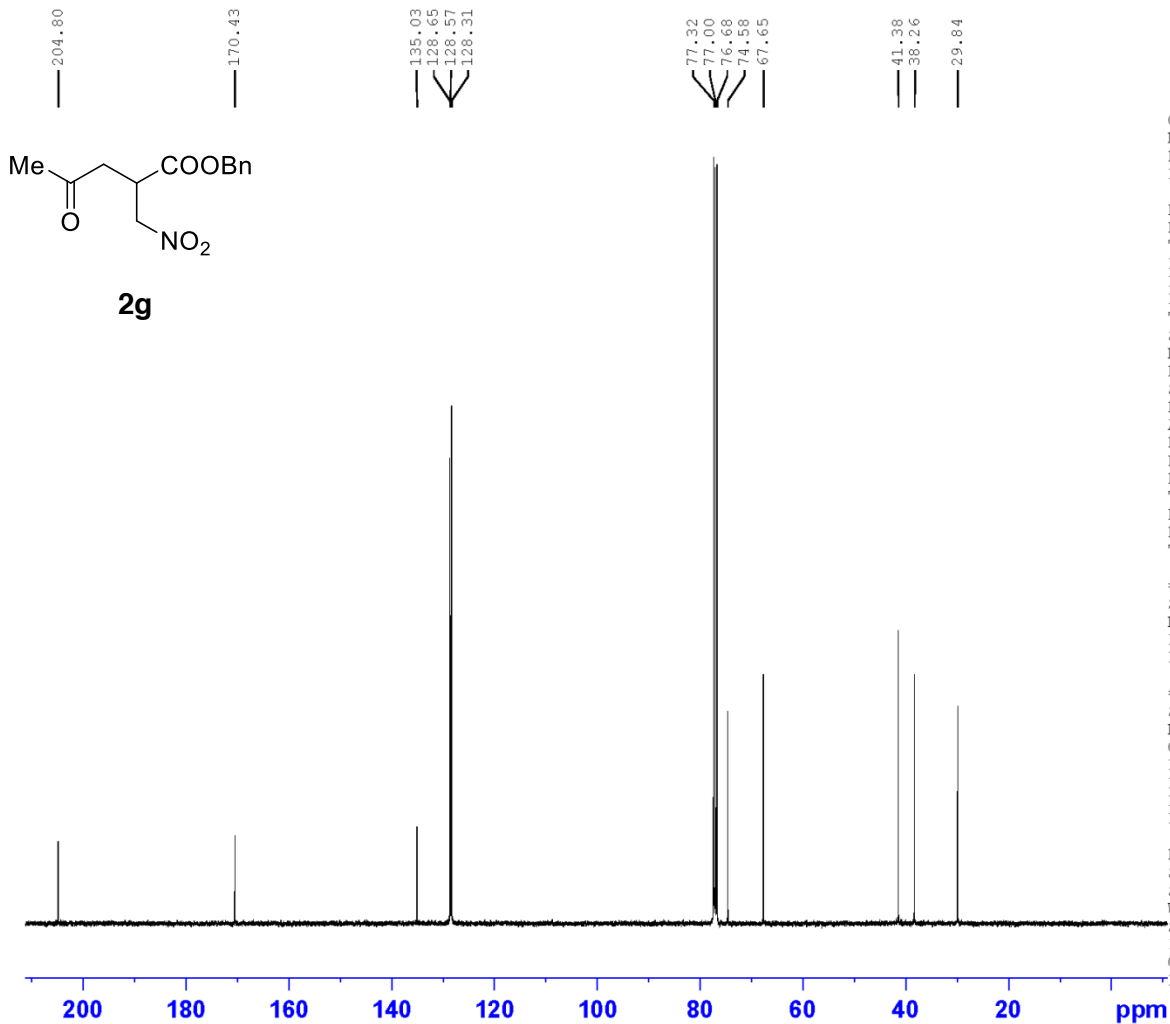

```

Current Data Parameters
NAME      yf-16-0402-BN-P-C
EXPNO     10
PROCNO    1

F2 - Acquisition Parameters
Date_     20160402
Time      20.13
INSTRUM   spect
PROBHD    5 mm PABBO BB/
PULPROG   zgpg30
TD         65536
SOLVENT   CDCl3
NS         3000
DS         4
SWH        24038.461 Hz
FIDRES     0.366798 Hz
AQ         1.3631488 sec
RG         195.88
DW         20.800 usec
DE         6.50 usec
TE         302.0 K
D1         2.00000000 sec
D11        0.03000000 sec
TD0        1

===== CHANNEL f1 =====
SFO1      100.6228293 MHz
NUC1       13C
P1         10.00 usec
PLW1       70.00000000 W

===== CHANNEL f2 =====
SFO2      400.1316005 MHz
NUC2       1H
CPDPRG[2] waltz16
PCPD2      80.00 usec
PLW2       8.00000000 W
PLW12      0.28125000 W
PLW13      0.28125000 W

F2 - Processing parameters
SI         32768
SF         100.6127691 MHz
WDW        EM
SSB        0
LB         1.00 Hz
GB         0
PC         1.40

```



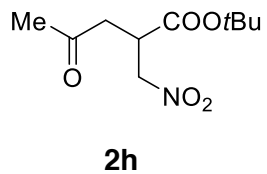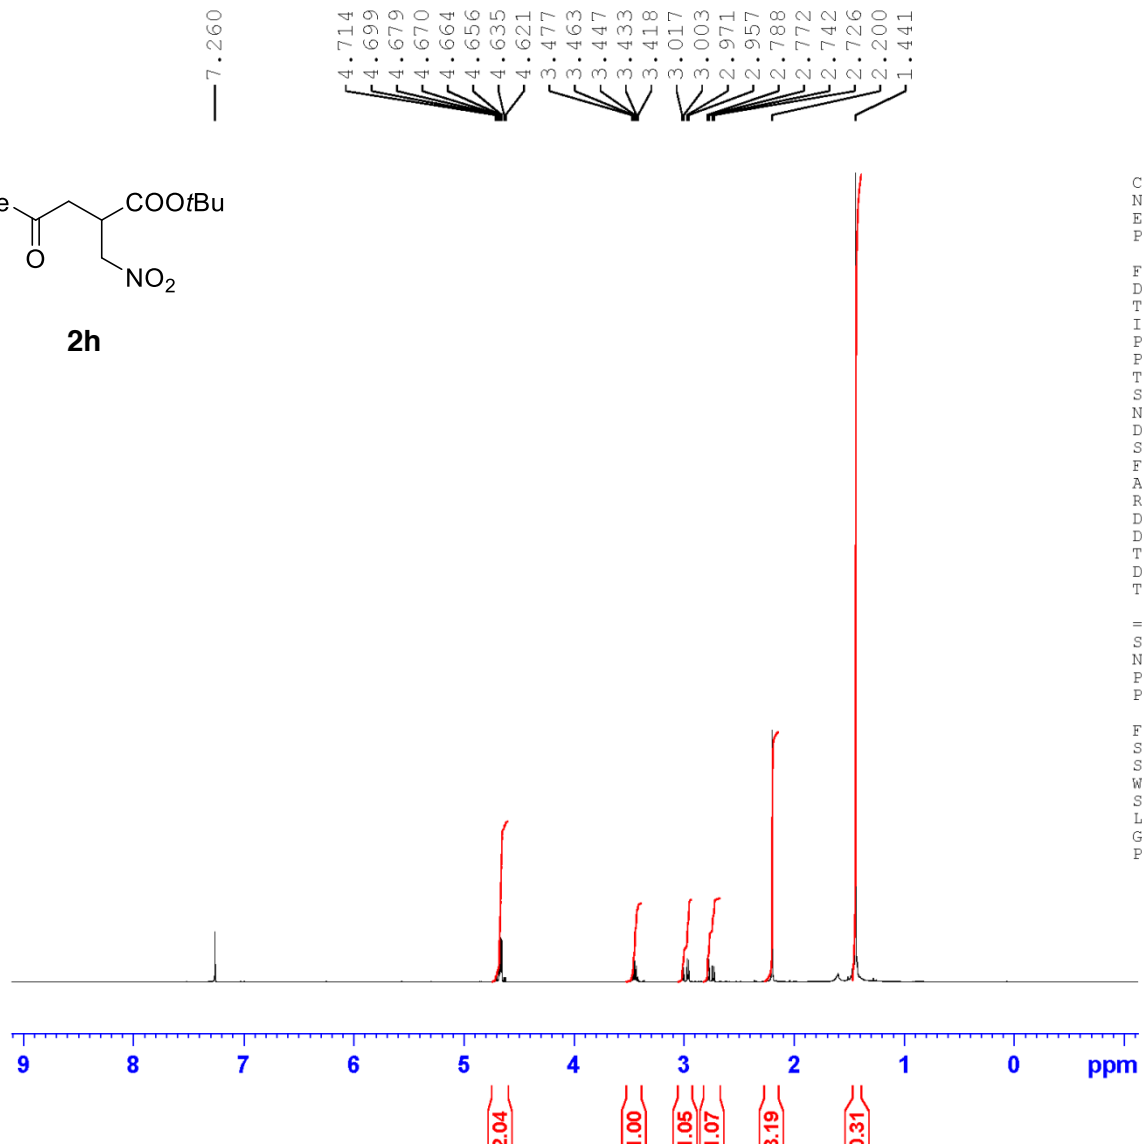

Current Data Parameters  
 NAME yf-16-0222-494  
 EXPNO 10  
 PROCNO 1

F2 - Acquisition Parameters  
 Date\_ 20160222  
 Time\_ 14.53  
 INSTRUM spect  
 PROBHD 5 mm PABBO BB/  
 PULPROG zg30  
 TD 65536  
 SOLVENT CDC13  
 NS 16  
 DS 2  
 SWH 8012.820 Hz  
 FIDRES 0.122266 Hz  
 AQ 4.089465 sec  
 RG 62.88  
 DW 62.400 usec  
 DE 6.50 usec  
 TE 300.2 K  
 D1 1.00000000 sec  
 TD0 1

===== CHANNEL f1 =====  
 SFO1 400.1324710 MHz  
 NUC1 1H  
 P1 15.00 usec  
 PLW1 8.00000000 W

F2 - Processing parameters  
 SI 65536  
 SF 400.1300095 MHz  
 WDW EM  
 SSB 0  
 LB 0.30 Hz  
 GB 0  
 PC 1.00

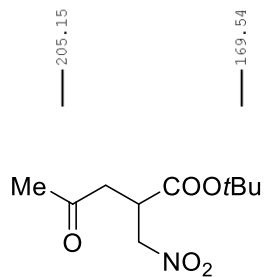

2h

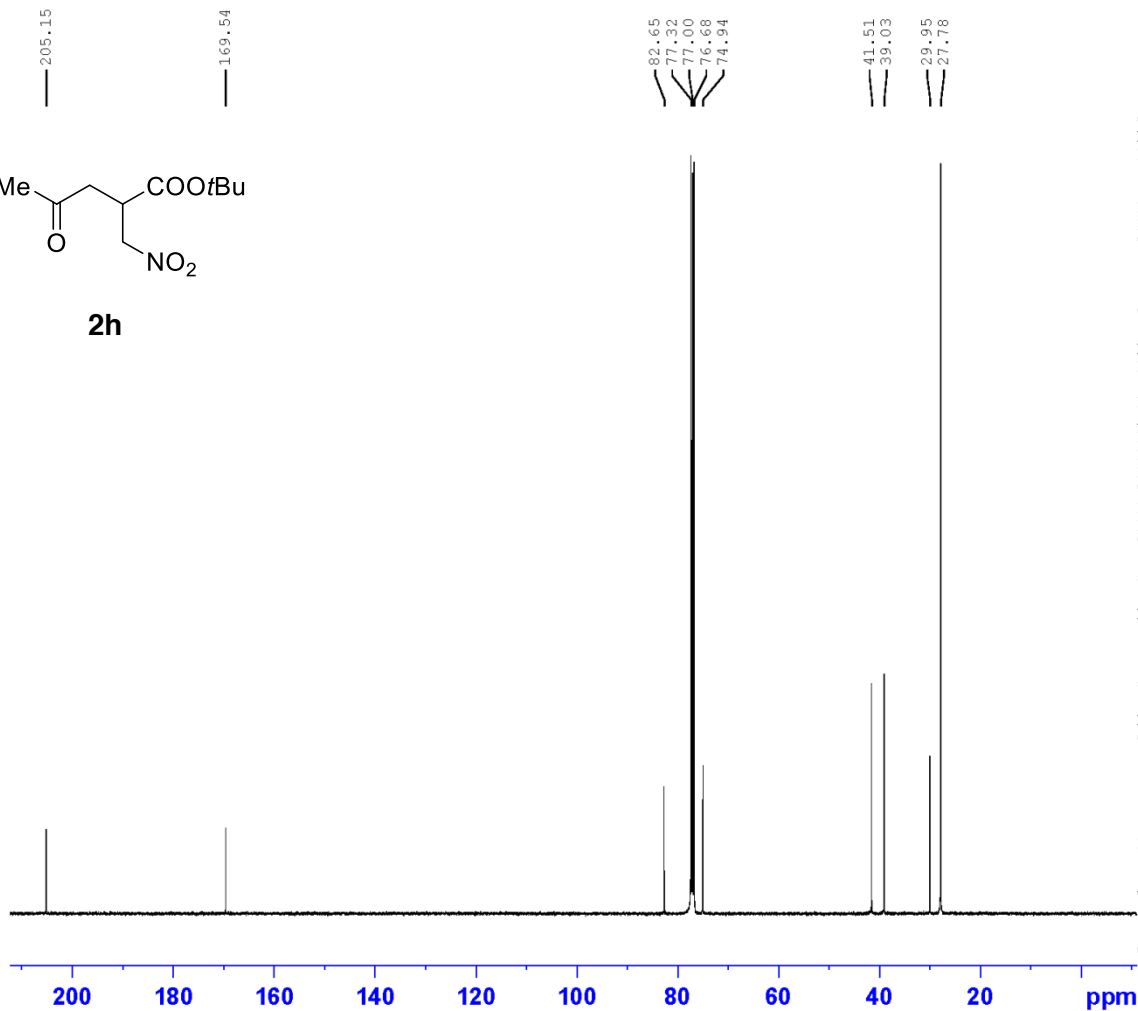

Current Data Parameters  
NAME YF-16-0815-494P-C  
EXPNO 10  
PROCNO 1

F2 - Acquisition Parameters  
Date\_ 20160816  
Time 6.27  
INSTRUM spect  
PROBHD 5 mm PABBO BB/  
PULPROG zgpg30  
TD 65536  
SOLVENT CDC13  
NS 7000  
DS 4  
SWH 24038.461 Hz  
FIDRES 0.366798 Hz  
AQ 1.3631488 sec  
RG 195.88  
DW 20.800 usec  
DE 6.50 usec  
TE 299.9 K  
D1 2.00000000 sec  
D11 0.03000000 sec  
TD0 1

===== CHANNEL f1 =====  
SFO1 100.6228293 MHz  
NUC1 13C  
P1 10.00 usec  
PLW1 70.00000000 W

===== CHANNEL f2 =====  
SFO2 400.1316005 MHz  
NUC2 1H  
CPDPRG[2] waltz16  
PCPD2 80.00 usec  
PLW2 8.00000000 W  
PLW12 0.28125000 W  
PLW13 0.28125000 W

F2 - Processing parameters  
SI 32768  
SF 100.6127706 MHz  
WDW EM  
SSB 0  
LB 1.00 Hz  
GB 0  
PC 1.40

7.260  
4.772  
4.757  
4.736  
4.722  
4.708  
4.686  
4.673  
4.222  
4.219  
4.213  
4.204  
4.201  
4.186  
4.184  
4.168  
4.166  
3.582  
3.568  
3.553  
3.538  
3.523  
3.033  
3.019  
2.987  
2.973  
2.805  
2.789  
2.760  
2.743  
2.513  
2.504  
2.494  
2.486  
2.476  
2.468  
2.457  
2.450  
1.273  
1.256  
1.238  
1.096  
1.078  
1.060

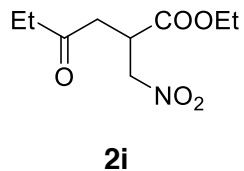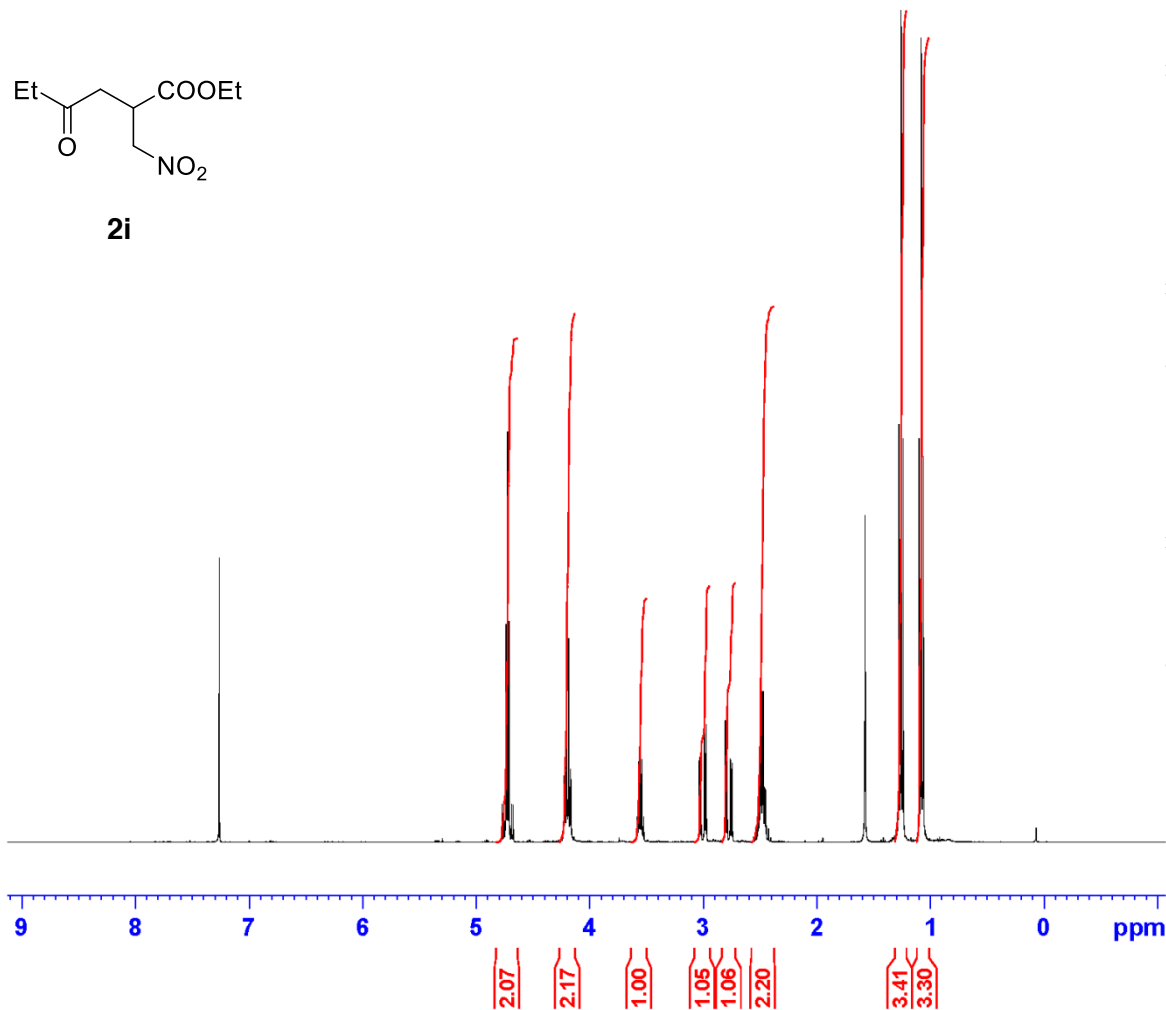

Current Data Parameters  
NAME yf-16-0711-600p  
EXPNO 10  
PROCNO 1

F2 - Acquisition Parameters  
Date\_ 20160711  
Time\_ 16.54  
INSTRUM spect  
PROBHD 5 mm PABBO BB/  
PULPROG zg30  
TD 65536  
SOLVENT CDCl3  
NS 16  
DS 2  
SWH 8012.820 Hz  
FIDRES 0.122266 Hz  
AQ 4.089465 sec  
RG 71.01  
DW 62.400 usec  
DE 6.50 usec  
TE 299.0 K  
D1 1.0000000 sec  
TD0 1

==== CHANNEL f1 =====  
SFO1 400.1324710 MHz  
NUC1 1H  
P1 15.00 usec  
PLW1 8.00000000 W

F2 - Processing parameters  
SI 65536  
SF 400.1300095 MHz  
WDW EM  
SSB 0  
LB 0.30 Hz  
GB 0  
PC 1.00

207.88  
170.63

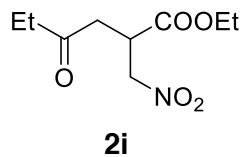

77.31  
77.00  
76.68  
74.75  
61.84  
40.14  
38.21  
35.99  
13.96  
7.61

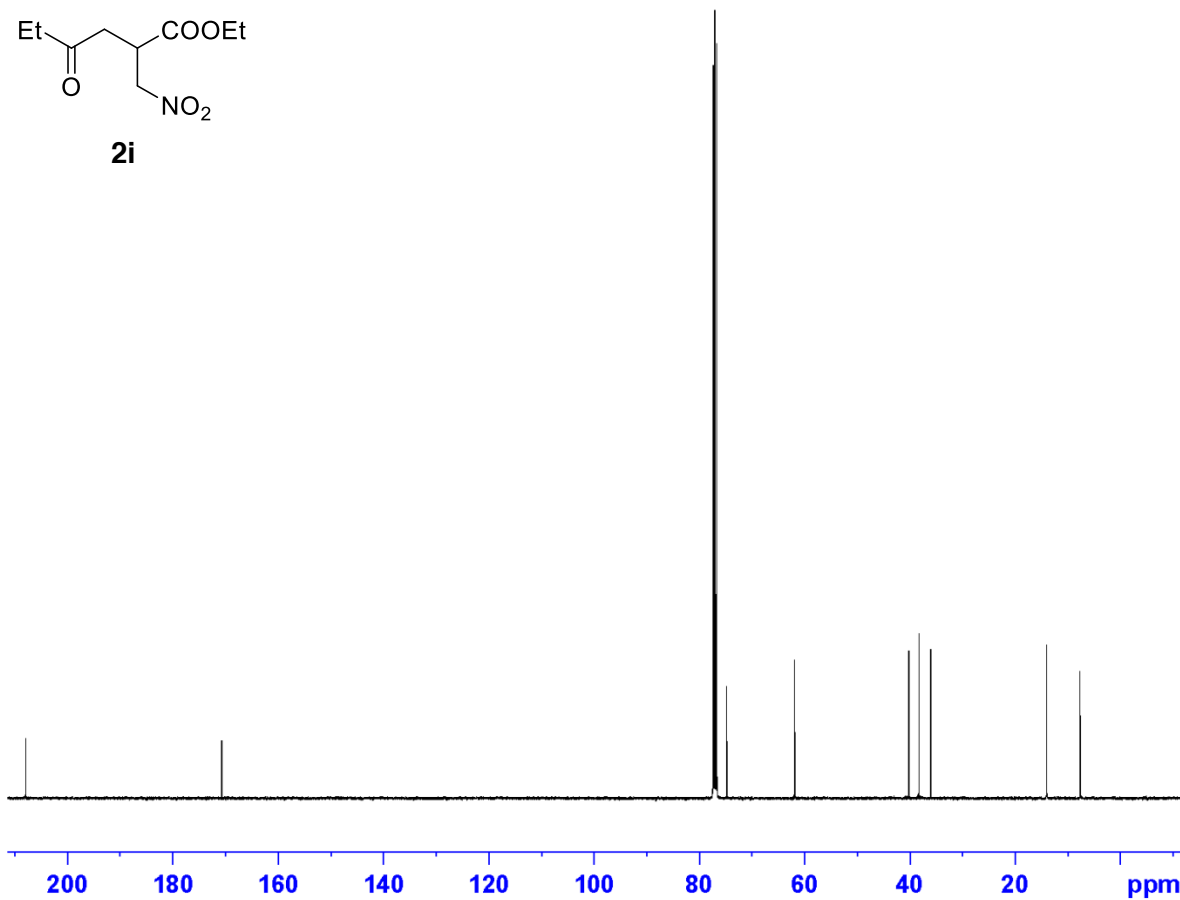

Current Data Parameters  
NAME YF-16-0711-600P-C  
EXPNO 10  
PROCNO 1

F2 - Acquisition Parameters  
Date\_ 20160712  
Time\_ 6.32  
INSTRUM spect  
PROBHD 5 mm PABBO BB/  
PULPROG zgpg30  
TD 65536  
SOLVENT CDCl3  
NS 8000  
DS 4  
SWH 24038.461 Hz  
FIDRES 0.366798 Hz  
AQ 1.3631488 sec  
RG 195.88  
DW 20.800 usec  
DE 6.50 usec  
TE 299.9 K  
D1 2.00000000 sec  
D11 0.03000000 sec  
TD0 1

==== CHANNEL f1 =====  
SFO1 100.6228293 MHz  
NUC1 13C  
P1 10.00 usec  
PLW1 70.00000000 W

==== CHANNEL f2 =====  
SFO2 400.1316005 MHz  
NUC2 1H  
CPDPRG[2] waltz16  
PCPD2 80.00 usec  
PLW2 8.00000000 W  
PLW12 0.28125000 W  
PLW13 0.28125000 W

F2 - Processing parameters  
SI 32768  
SF 100.6127706 MHz  
WDW EM  
SSB 0  
LB 1.00 Hz  
GB 0  
PC 1.40

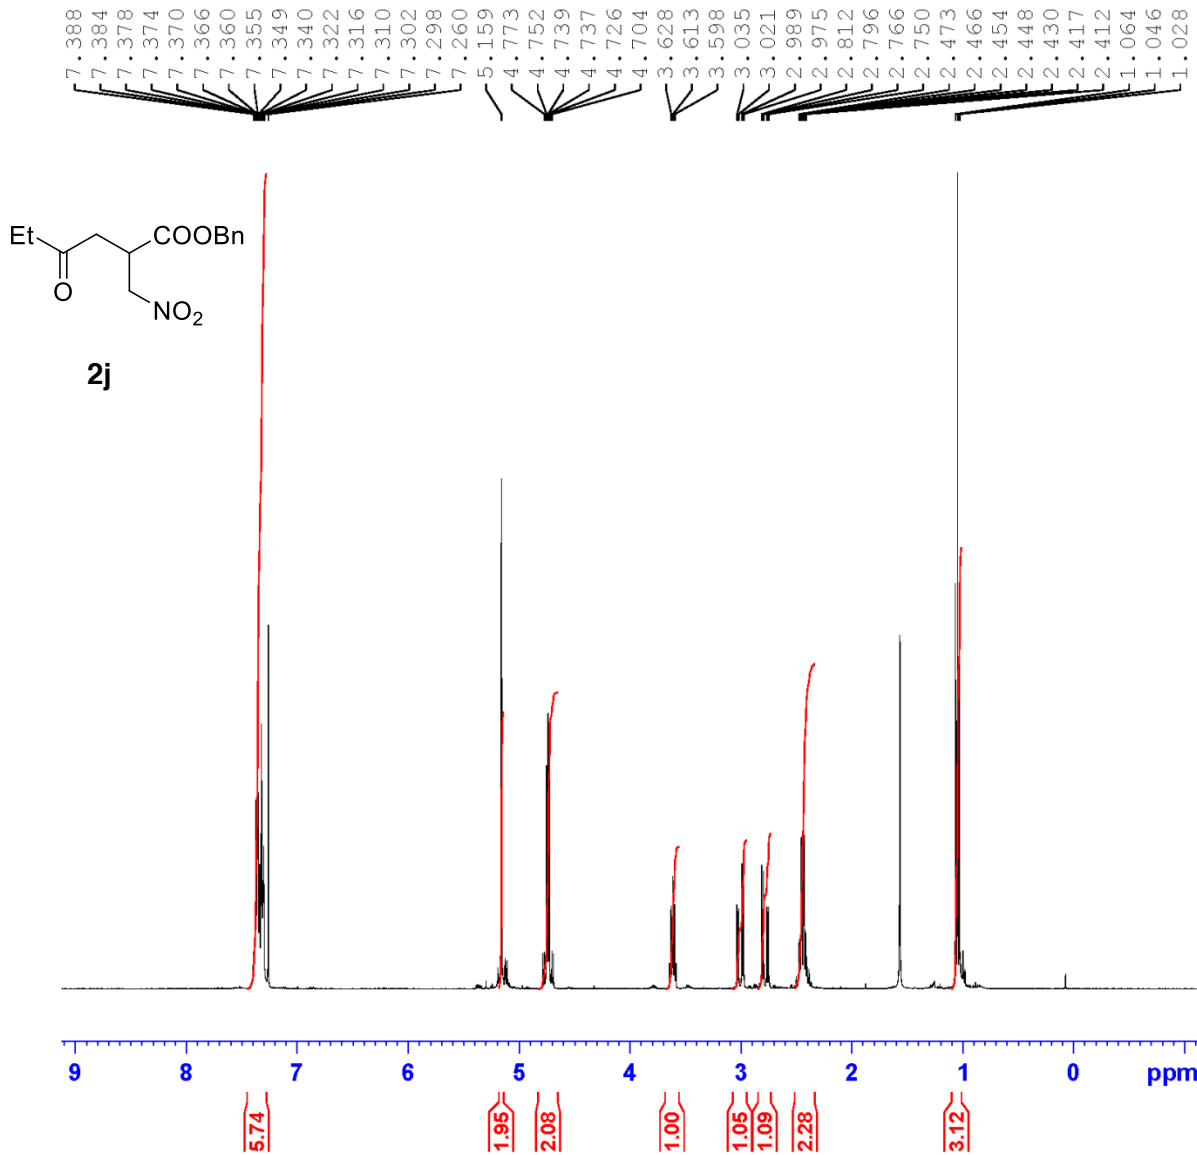

Current Data Parameters  
 NAME YF-16-0720-607P  
 EXPNO 10  
 PROCNO 1

F2 - Acquisition Parameters  
 Date\_ 20160720  
 Time\_ 16.40  
 INSTRUM spect  
 PROBHD 5 mm PABBO BB/  
 PULPROG zg30  
 TD 65536  
 SOLVENT CDC13  
 NS 16  
 DS 2  
 SWH 8012.820 Hz  
 FIDRES 0.122266 Hz  
 AQ 4.0894465 sec  
 RG 71.01  
 DW 62.400 usec  
 DE 6.50 usec  
 TE 299.2 K  
 D1 1.00000000 sec  
 TD0 1

===== CHANNEL f1 =====  
 SFO1 400.1324710 MHz  
 NUC1 1H  
 P1 15.00 usec  
 PLW1 8.00000000 W

F2 - Processing parameters  
 SI 65536  
 SF 400.1300095 MHz  
 WDW EM  
 SSB 0  
 LB 0.30 Hz  
 GB 0  
 PC 1.00

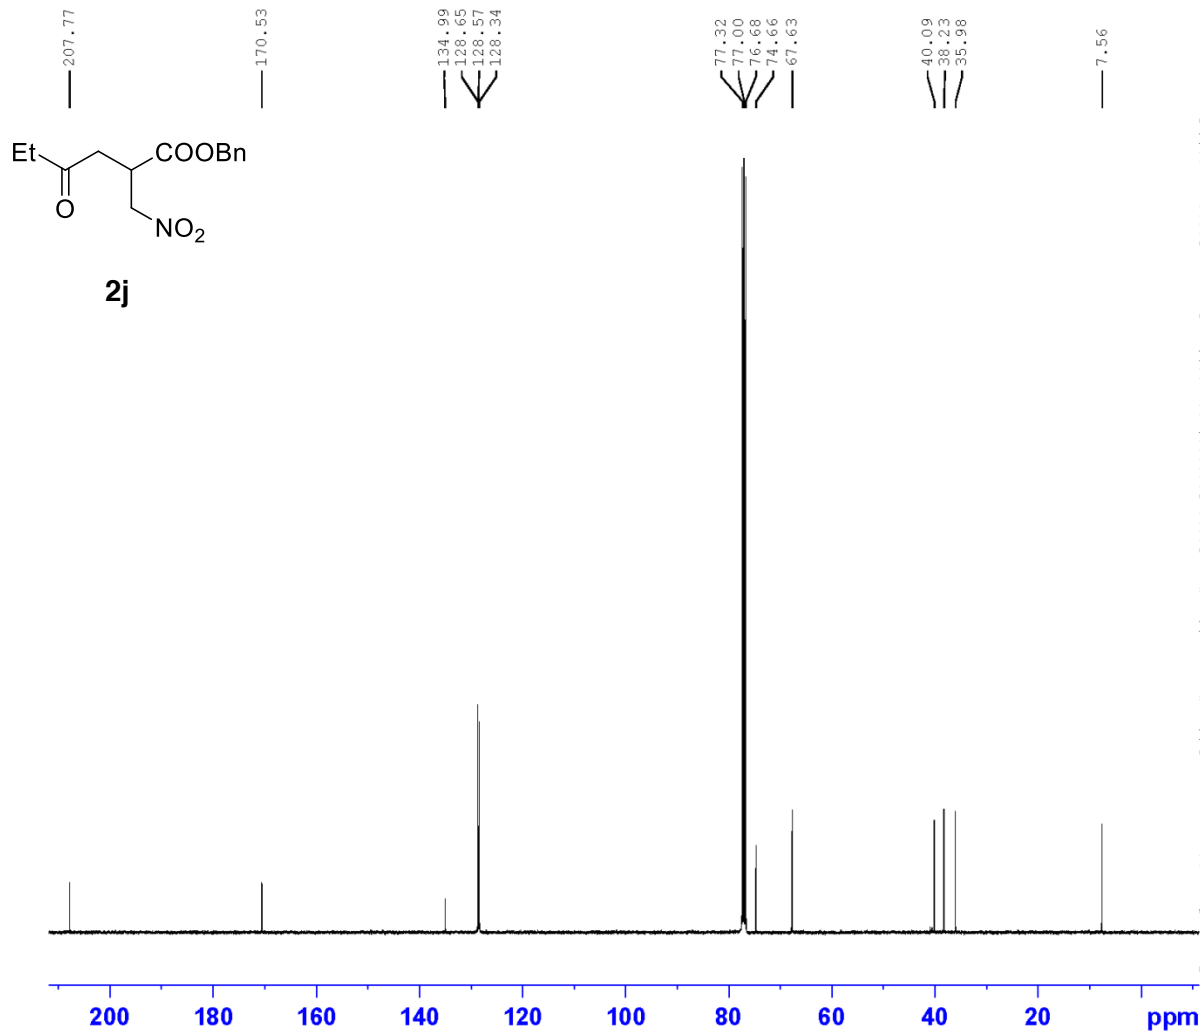

Current Data Parameters  
 NAME YF-16-0727-607P-C  
 EXPNO 10  
 PROCNO 1

F2 - Acquisition Parameters  
 Date 20160728  
 Time 3.59  
 INSTRUM spect  
 PROBHD 5 mm PABBO BB/  
 PULPROG zgpg30  
 TD 65536  
 SOLVENT CDCl3  
 NS 6000  
 DS 4  
 SWH 24038.461 Hz  
 FIDRES 0.366798 Hz  
 AQ 1.3631488 sec  
 RG 195.88  
 DW 20.800 usec  
 DE 6.50 usec  
 TE 299.9 K  
 D1 2.0000000 sec  
 D11 0.0300000 sec  
 TD0 1

===== CHANNEL f1 =====  
 SFO1 100.6228293 MHz  
 NUC1 13C  
 P1 10.00 usec  
 PLW1 70.0000000 W

===== CHANNEL f2 =====  
 SFO2 400.1316005 MHz  
 NUC2 1H  
 CPDPRG[2] waltz16  
 FCPD2 80.00 usec  
 PLW2 8.0000000 W  
 PLW12 0.2812500 W  
 PLW13 0.2812500 W

F2 - Processing parameters  
 SI 32768  
 SF 100.6127706 MHz  
 WDW EM  
 SSB 0  
 LB 1.00 Hz  
 GB 0  
 PC 1.40

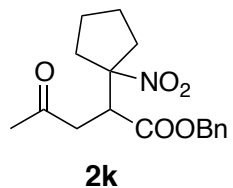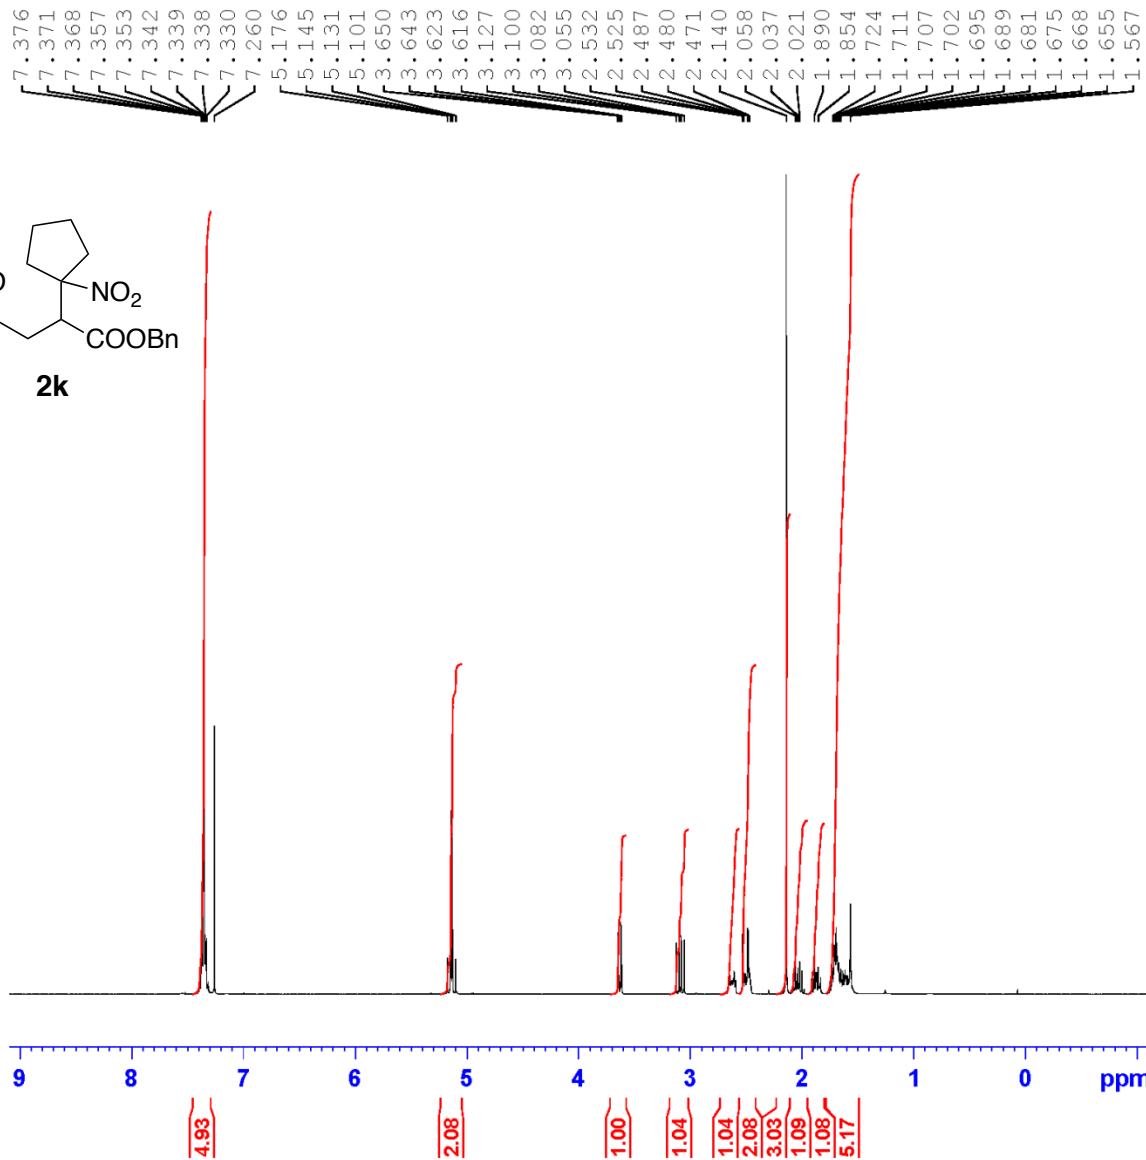

```

Current Data Parameters
NAME      YF-17-0105-701P
EXPNO     10
PROCNO    1

F2 - Acquisition Parameters
Date_     20170105
Time      11.25
INSTRUM   spect
PROBHD    5 mm PABBO BB/
PULPROG   zg30
TD         65536
SOLVENT   CDCl3
NS         16
DS         2
SWH        8012.820 Hz
FIDRES     0.122266 Hz
AQ         4.0894465 sec
RG         71.01
DW         62.400 usec
DE         6.50 usec
TE         298.5 K
D1         1.00000000 sec
TD0        1

===== CHANNEL f1 =====
SFO1      400.1324710 MHz
NUC1       1H
P1         15.00 usec
PLW1       7.50000000 W

F2 - Processing parameters
SI         65536
SF         400.1300095 MHz
WDW        EM
SSB        0
LB         0.30 Hz
GB         0
PC         1.00

```

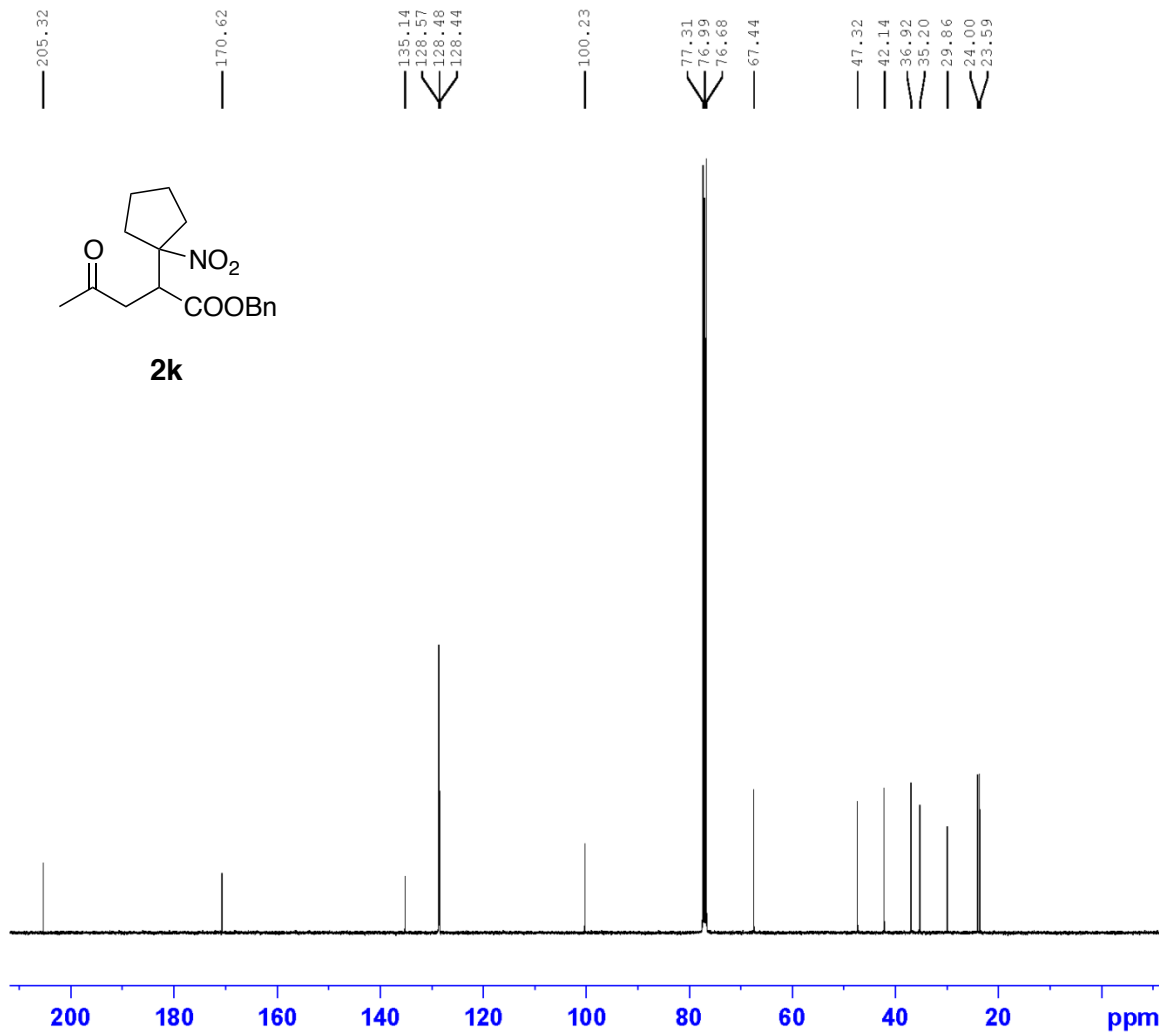

Current Data Parameters  
 NAME yf-17-0105-701p-c  
 EXPNO 10  
 PROCNO 1

F2 - Acquisition Parameters  
 Date\_ 20170106  
 Time\_ 3.45  
 INSTRUM spect  
 PROBHD 5 mm PABBO BB/  
 PULPROG zgpg30  
 TD 65536  
 SOLVENT CDCl3  
 NS 6000  
 DS 4  
 SWH 24038.461 Hz  
 FIDRES 0.366798 Hz  
 AQ 1.3631488 sec  
 RG 195.88  
 DW 20.800 usec  
 DE 6.50 usec  
 TE 299.5 K  
 D1 2.00000000 sec  
 D11 0.03000000 sec  
 TD0 1

===== CHANNEL f1 =====  
 SFO1 100.6228293 MHz  
 NUC1 13C  
 P1 10.00 usec  
 PLW1 72.00000000 W

===== CHANNEL f2 =====  
 SFO2 400.1316005 MHz  
 NUC2 1H  
 CPDPRG[2] waltz16  
 PCPD2 80.00 usec  
 PLW2 7.50000000 W  
 PLW12 0.26367000 W  
 PLW13 0.16633999 W

F2 - Processing parameters  
 SI 32768  
 SF 100.6127713 MHz  
 WDW EM  
 SSB 0  
 LB 1.00 Hz  
 GB 0  
 PC 1.40



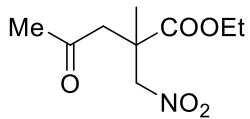

21

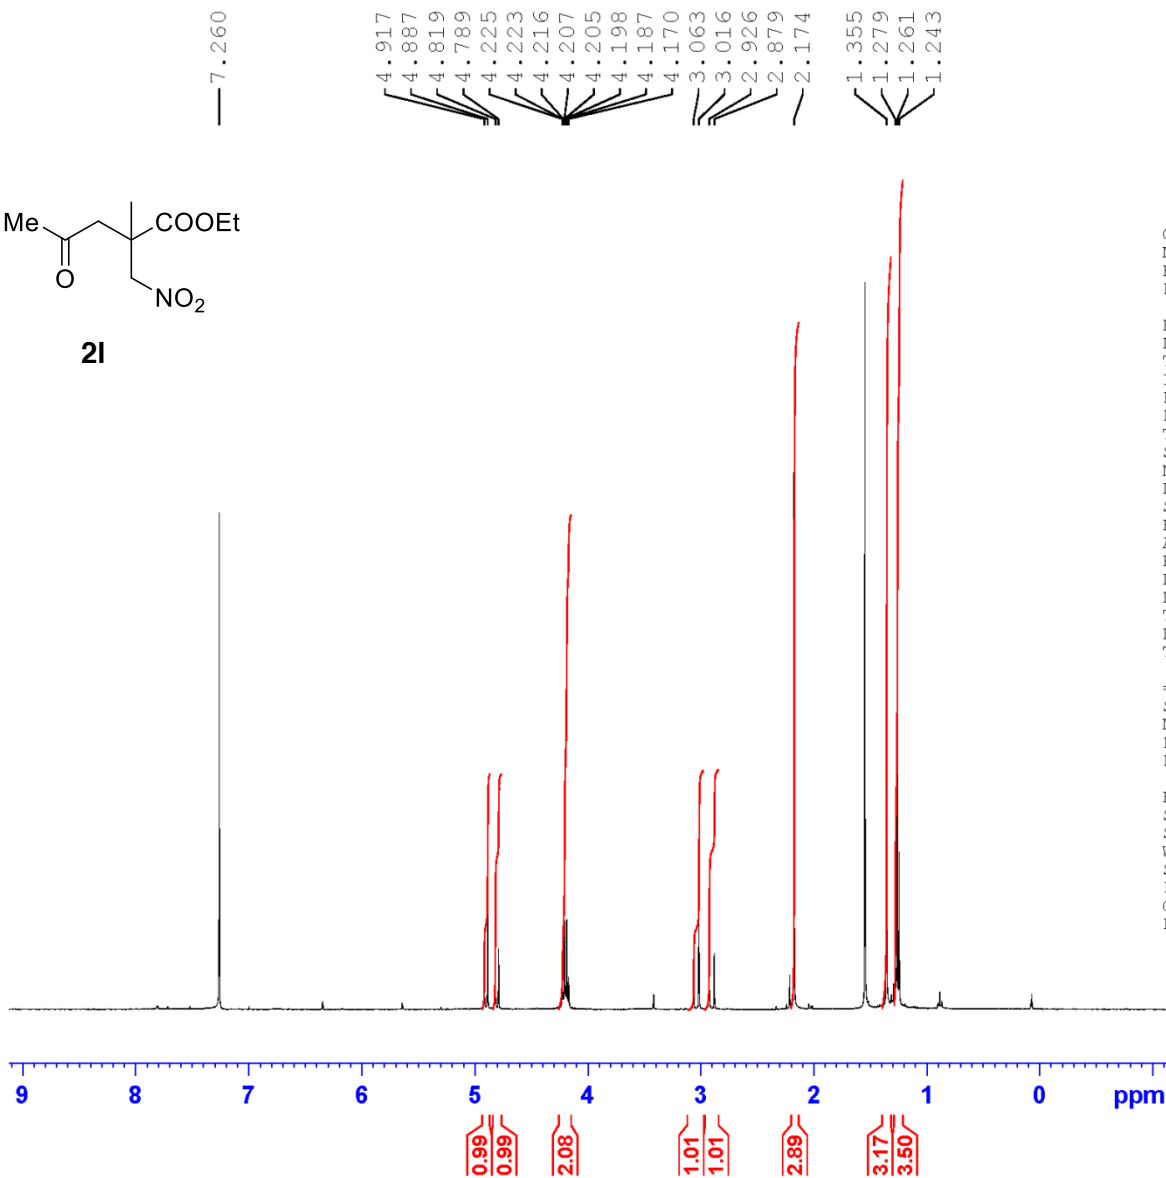

Current Data Parameters  
 NAME yf-16-0405-527p-2  
 EXPNO 10  
 PROCNO 1

F2 - Acquisition Parameters  
 Date\_ 20160405  
 Time\_ 22.59  
 INSTRUM spect  
 PROBHD 5 mm PABBO BB/  
 PULPROG zg30  
 TD 65536  
 SOLVENT CDCl3  
 NS 16  
 DS 2  
 SWH 8012.820 Hz  
 FIDRES 0.122266 Hz  
 AQ 4.0894465 sec  
 RG 88.94  
 DW 62.400 usec  
 DE 6.50 usec  
 TE 300.2 K  
 D1 1.00000000 sec  
 TD0 1

==== CHANNEL f1 =====  
 SFO1 400.1324710 MHz  
 NUC1 1H  
 P1 15.00 usec  
 PLW1 8.00000000 W

F2 - Processing parameters  
 SI 65536  
 SF 400.1300095 MHz  
 WDW EM  
 SSB 0  
 LB 0.30 Hz  
 GB 0  
 PC 1.00

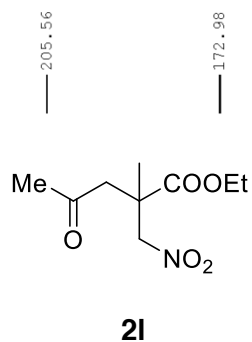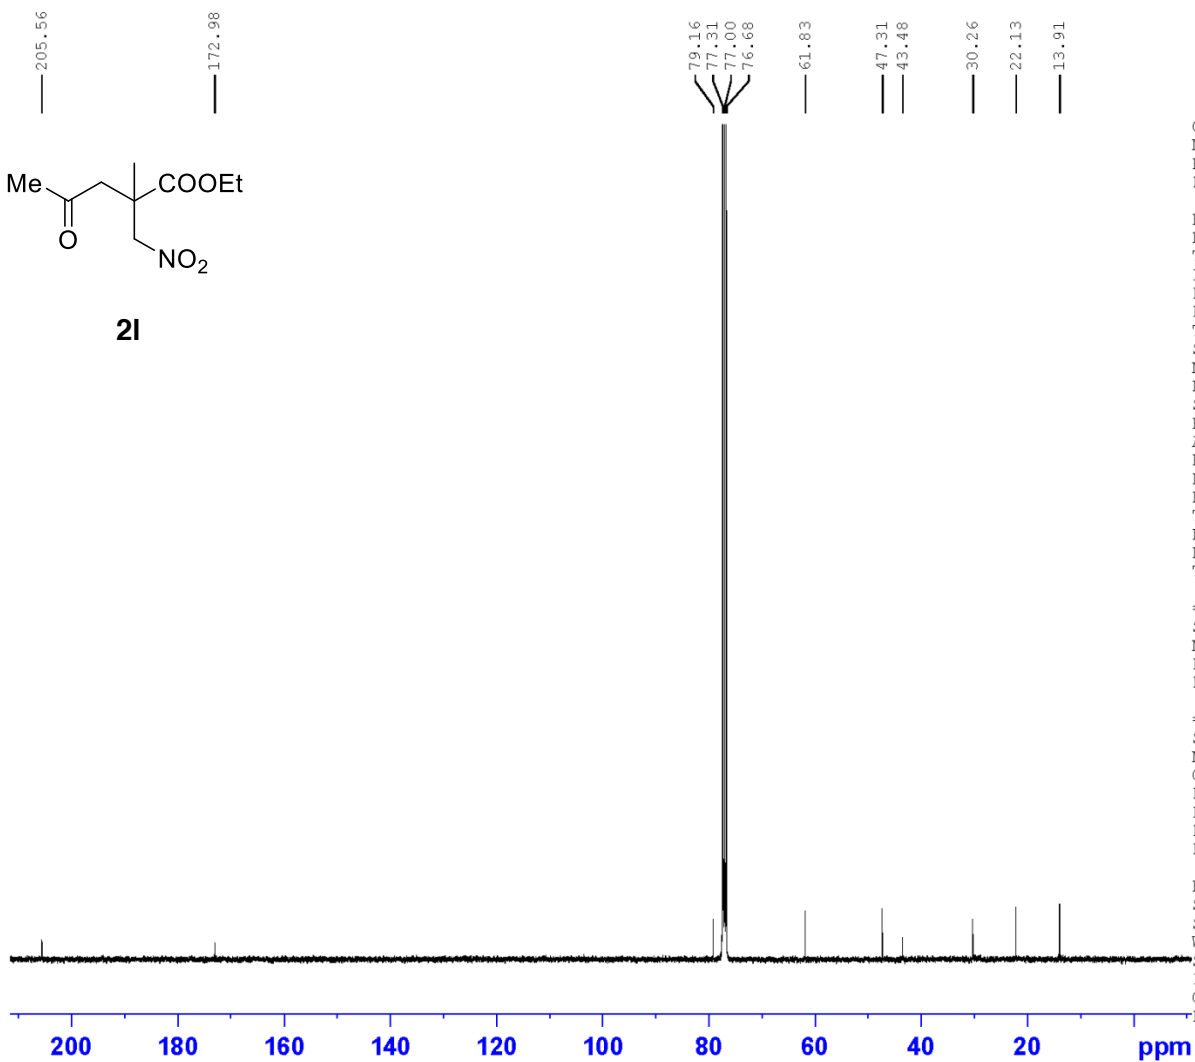

Current Data Parameters  
 NAME yf-16-0406-527p-c  
 EXPNO 10  
 PROCNO 1

F2 - Acquisition Parameters  
 Date\_ 20160407  
 Time\_ 5.12  
 INSTRUM spect  
 PROBHD 5 mm PABBO BB/  
 PULPROG zgpg30  
 TD 65536  
 SOLVENT CDCl3  
 NS 7000  
 DS 4  
 SWH 24038.461 Hz  
 FIDRES 0.366798 Hz  
 AQ 1.3631488 sec  
 RG 195.88  
 DW 20.800 usec  
 DE 6.50 usec  
 TE 302.1 K  
 D1 2.00000000 sec  
 D11 0.03000000 sec  
 TD0 1

===== CHANNEL f1 =====  
 SFO1 100.6228293 MHz  
 NUC1 13C  
 P1 10.00 usec  
 PLW1 70.00000000 W

===== CHANNEL f2 =====  
 SFO2 400.1316005 MHz  
 NUC2 1H  
 CPDPRG[2] waltz16  
 PCPD2 80.00 usec  
 PLW2 8.00000000 W  
 PLW12 0.28125000 W  
 PLW13 0.28125000 W

F2 - Processing parameters  
 SI 32768  
 SF 100.6127669 MHz  
 WDW EM  
 SSB 0  
 LB 1.00 Hz  
 GB 0  
 PC 1.40

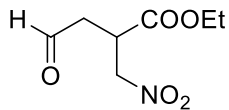

2m

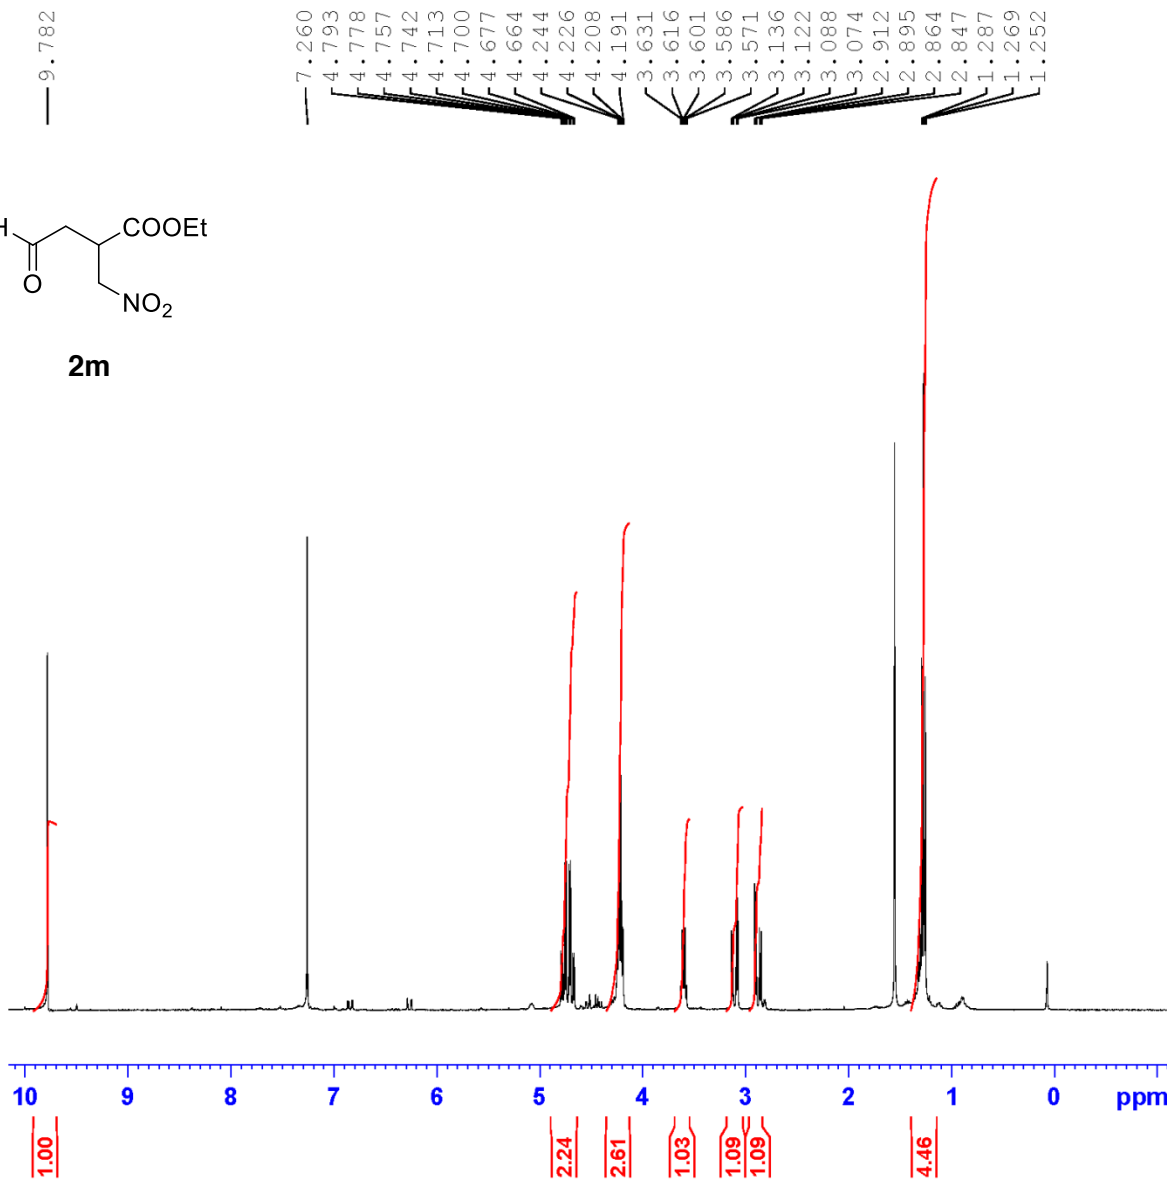

Current Data Parameters  
 NAME yf-16-0403-525p-h  
 EXPNO 10  
 PROCNO 1

F2 - Acquisition Parameters  
 Date\_ 20160403  
 Time\_ 18.35  
 INSTRUM spect  
 PROBHD 5 mm PABBO BB/  
 PULPROG zg30  
 TD 65536  
 SOLVENT CDCl3  
 NS 16  
 DS 2  
 SWH 8012.820 Hz  
 FIDRES 0.122266 Hz  
 AQ 4.0894465 sec  
 RG 77.81  
 DW 62.400 usec  
 DE 6.50 usec  
 TE 300.3 K  
 D1 1.00000000 sec  
 TD0 1

==== CHANNEL f1 =====  
 SFO1 400.1324710 MHz  
 NUC1 1H  
 P1 15.00 usec  
 PLW1 8.00000000 W

F2 - Processing parameters  
 SI 65536  
 SF 400.1300096 MHz  
 WDW EM  
 SSB 0  
 LB 0.30 Hz  
 GB 0  
 PC 1.00

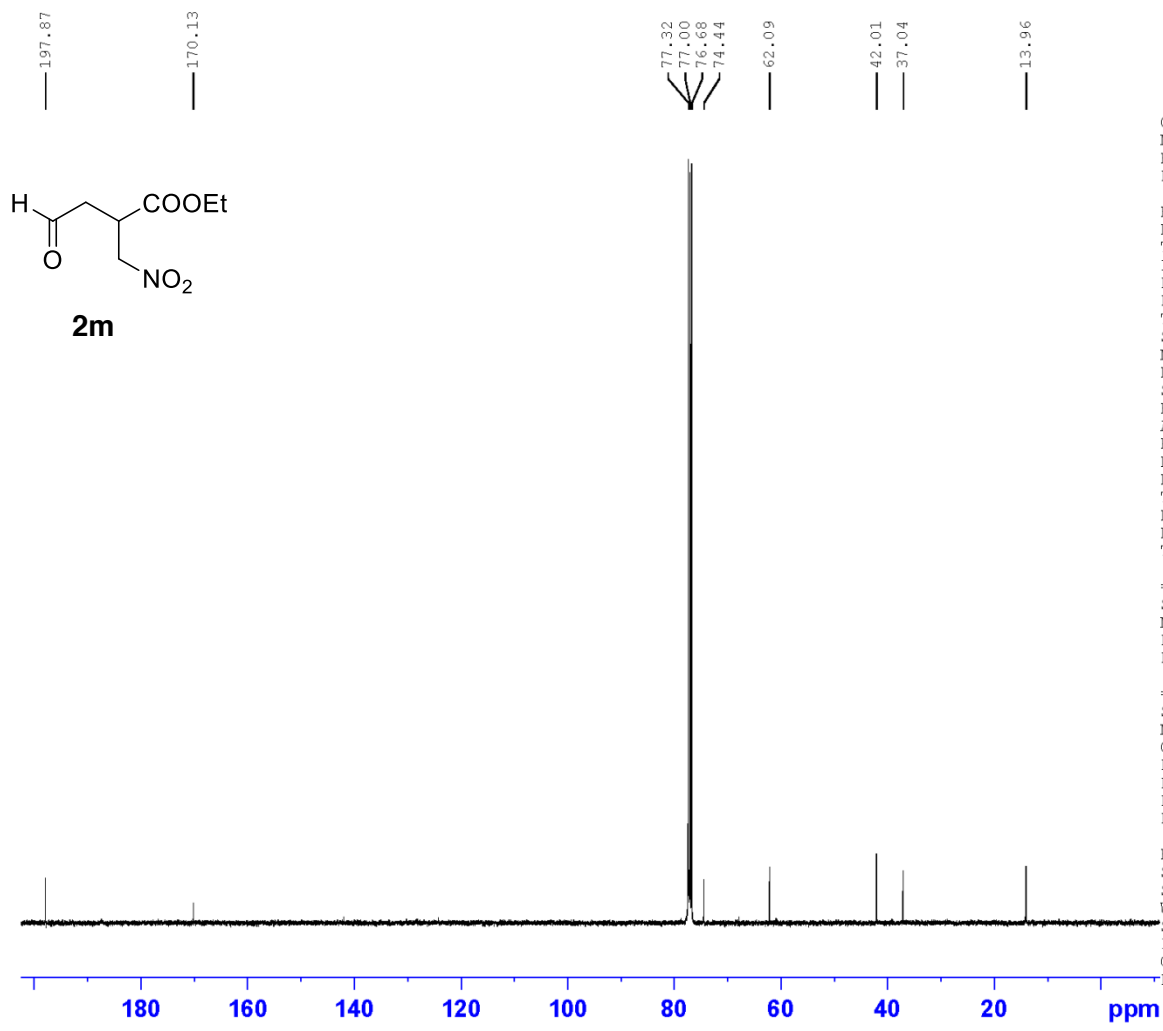

```

Current Data Parameters
NAME      yf-16-0403-525p-c
EXPNO     10
PROCNO    1

F2 - Acquisition Parameters
Date_     20160403
Time      21.33
INSTRUM   spect
PROBHD    5 mm PABBO BB/
PULPROG   zgpg30
TD         65536
SOLVENT   CDCl3
NS         3000
DS         4
SWH        24038.461 Hz
FIDRES     0.366798 Hz
AQ         1.3631488 sec
RG         195.88
DW         20.800 usec
DE         6.50 usec
TE         302.0 K
D1         2.00000000 sec
D11        0.03000000 sec
TD0        1

===== CHANNEL f1 =====
SFO1      100.6228293 MHz
NUC1       13C
P1         10.00 usec
PLW1       70.00000000 W

===== CHANNEL f2 =====
SFO2      400.1316005 MHz
NUC2       1H
CPDPRG[2] waltz16
PCPD2      80.00 usec
PLW2       8.00000000 W
PLW12      0.28125000 W
PLW13      0.28125000 W

F2 - Processing parameters
SI         32768
SF         100.6127669 MHz
WDW        EM
SSB        0
LB         1.00 Hz
GB         0
PC         1.40

```

4.941  
 3.667  
 3.657  
 3.650  
 3.642  
 3.634  
 3.625  
 3.618  
 3.609  
 3.560  
 3.542  
 3.531  
 3.513  
 3.389  
 3.367  
 3.360  
 3.338  
 3.318  
 3.314  
 3.310  
 3.306  
 3.302  
 3.107  
 3.085  
 3.065  
 3.046  
 3.031  
 3.024  
 2.501  
 2.484  
 2.481  
 2.468  
 2.465  
 2.451  
 2.448  
 2.431  
 1.833  
 1.809  
 1.800  
 1.785  
 1.777  
 1.752  
 1.420  
 1.404

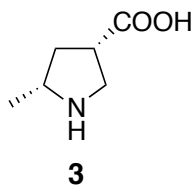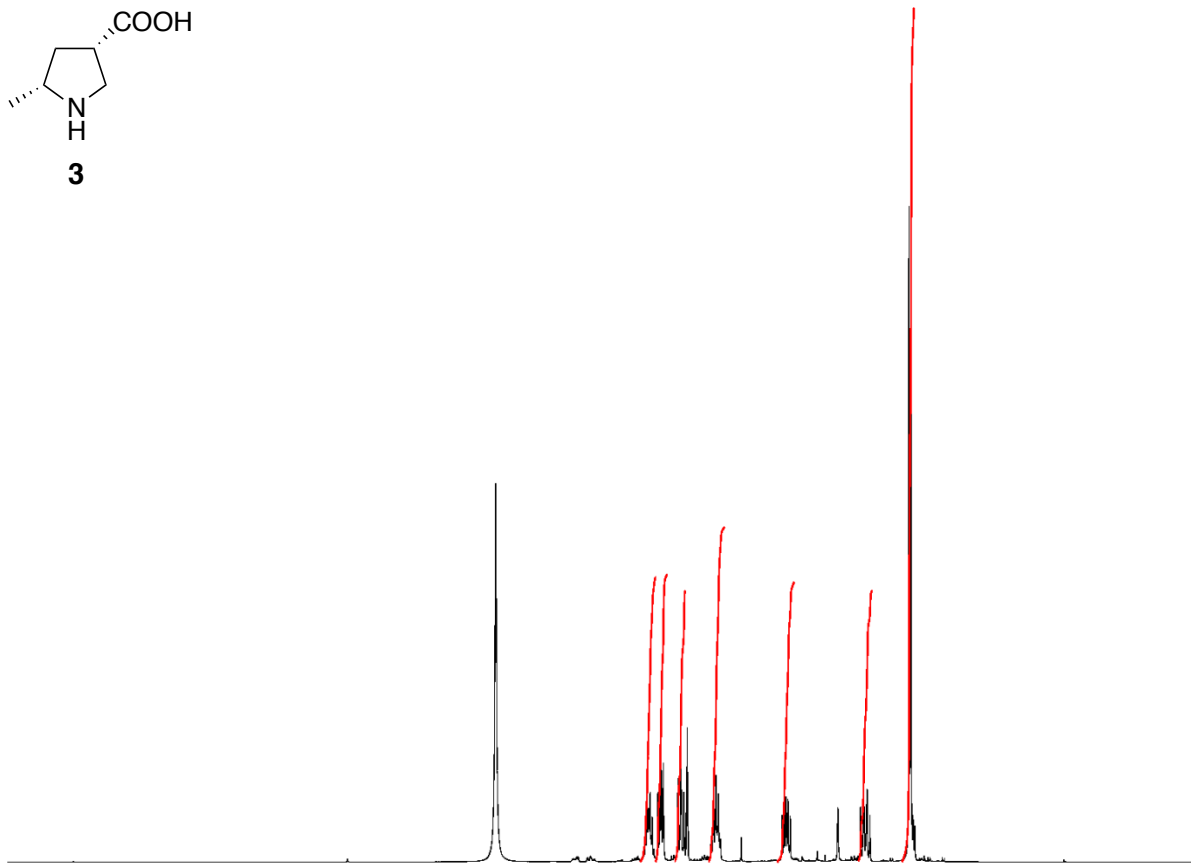

```

Current Data Parameters
NAME      yf-16-1110-688cp
EXPNO     10
PROCNO    1

F2 - Acquisition Parameters
Date_     20161110
Time_     15.23
INSTRUM   spect
PROBHD    5 mm PABBO BB/
PULPROG   zg30
TD        65536
SOLVENT   CD3OD_SPE
NS        16
DS        2
SWH       8012.820 Hz
FIDRES    0.122266 Hz
AQ        4.0894465 sec
RG        31.13
DW        62.400 usec
DE        6.50 usec
TE        298.5 K
D1        1.00000000 sec
TD0       1

===== CHANNEL f1 =====
SFO1      400.1324710 MHz
NUC1      1H
P1        15.00 usec
PLW1      7.50000000 W

F2 - Processing parameters
SI        65536
SF        400.1300076 MHz
WDW       EM
SSB       0
LB        0.30 Hz
GB        0
PC        1.00
  
```

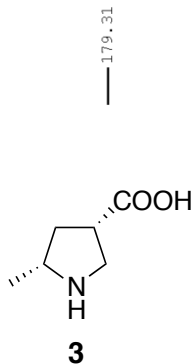

57.72  
49.64  
49.43  
49.21  
49.11  
49.00  
48.79  
48.57  
48.36  
46.33  
37.86

17.49

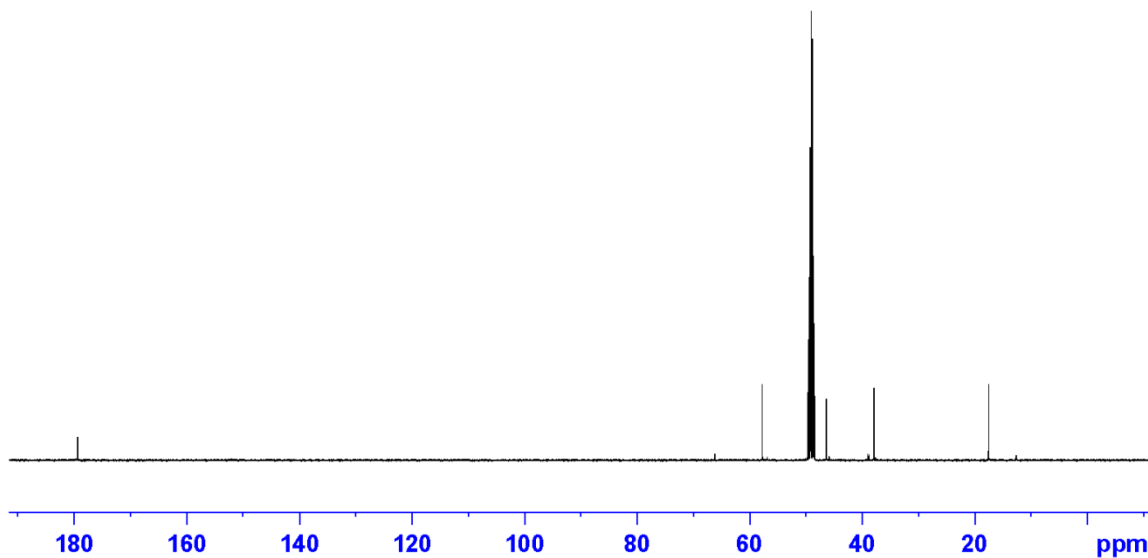

```

Current Data Parameters
NAME      yf-16-1110-688cp
EXPNO     20
PROCNO    1

F2 - Acquisition Parameters
Date_     20161110
Time      15.58
INSTRUM   spect
PROBHD    5 mm PABBO BB/
PULPROG   zgpg30
TD         65536
SOLVENT   CD3OD_SPE
NS         512
DS         4
SWH        24038.461 Hz
FIDRES     0.366798 Hz
AQ         1.3631488 sec
RG         195.88
DW         20.800 usec
DE         6.50 usec
TE         299.1 K
D1         2.00000000 sec
D11        0.03000000 sec
TD0        1

===== CHANNEL f1 =====
SFO1       100.6228293 MHz
NUC1        13C
P1          10.00 usec
PLW1        72.00000000 W

===== CHANNEL f2 =====
SFO2       400.1316005 MHz
NUC2         1H
CPDPRG[2]   waltz16
PCPD2        80.00 usec
PLW2         7.50000000 W
PLW12        0.26367000 W
PLW13        0.16633999 W

F2 - Processing parameters
SI          32768
SF          100.6126284 MHz
WDW         EM
SSB         0
LB          1.00 Hz
GB          0
PC          1.40
  
```

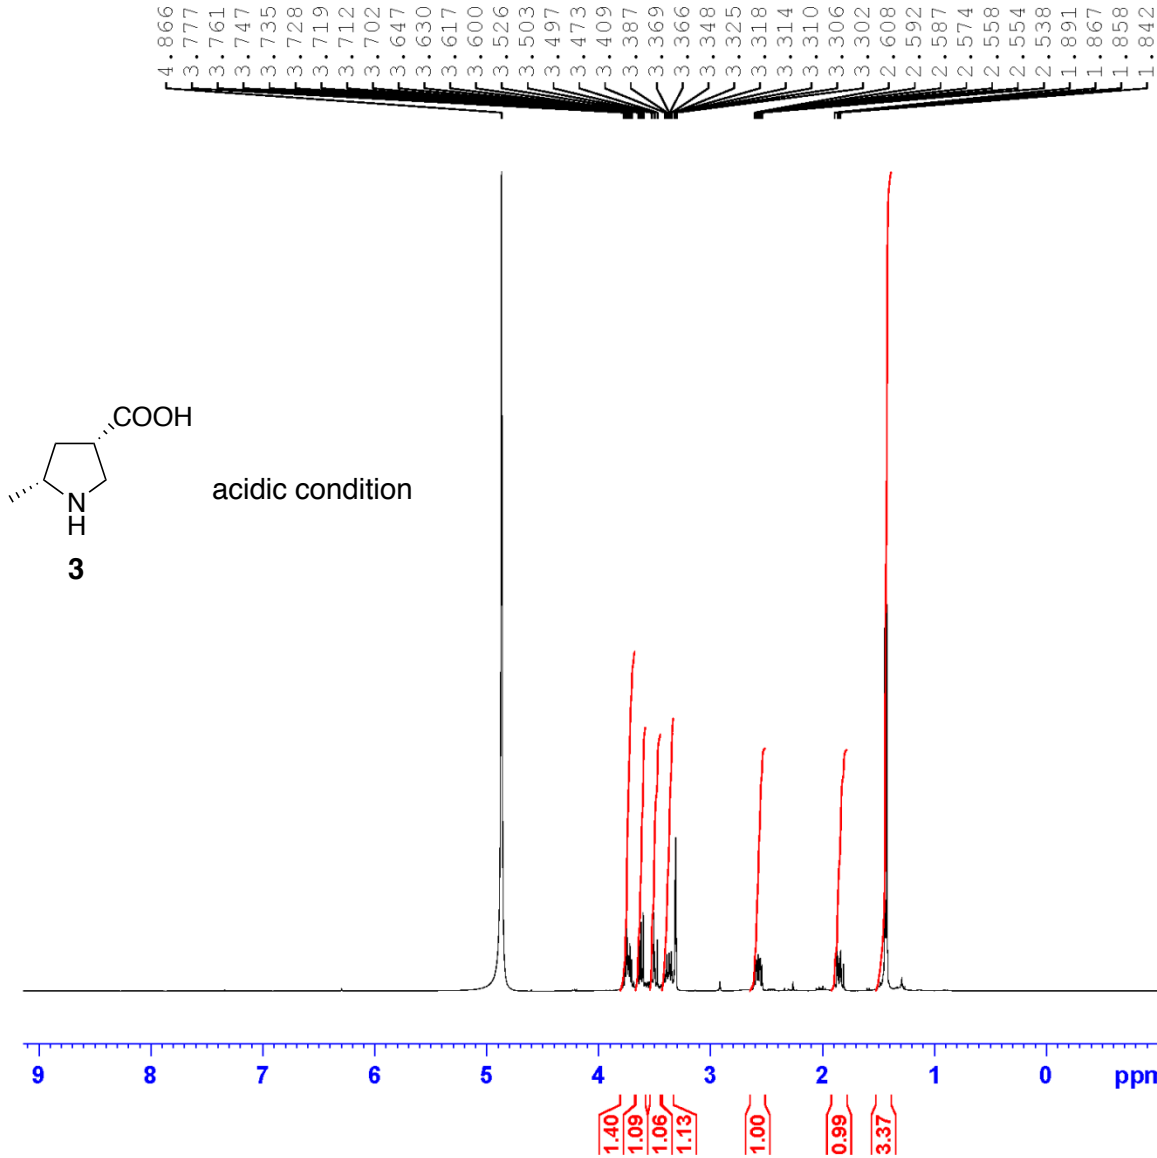

Current Data Parameters  
 NAME YF-16-1109-689-1  
 EXPNO 10  
 PROCNO 1

F2 - Acquisition Parameters  
 Date\_ 20161109  
 Time\_ 15.48  
 INSTRUM spect  
 PROBHD 5 mm PABBO BB/  
 PULPROG zg30  
 TD 65536  
 SOLVENT CD3OD\_SPE  
 NS 16  
 DS 2  
 SWH 8012.820 Hz  
 FIDRES 0.122266 Hz  
 AQ 4.0894465 sec  
 RG 62.88  
 DW 62.400 usec  
 DE 6.50 usec  
 TE 298.6 K  
 D1 1.00000000 sec  
 TD0 1

===== CHANNEL f1 =====  
 SFO1 400.1324710 MHz  
 NUC1 1H  
 P1 15.00 usec  
 PLW1 7.50000000 W

F2 - Processing parameters  
 SI 65536  
 SF 400.1300074 MHz  
 WDW EM  
 SSB 0  
 LB 0.30 Hz  
 GB 0  
 PC 1.00

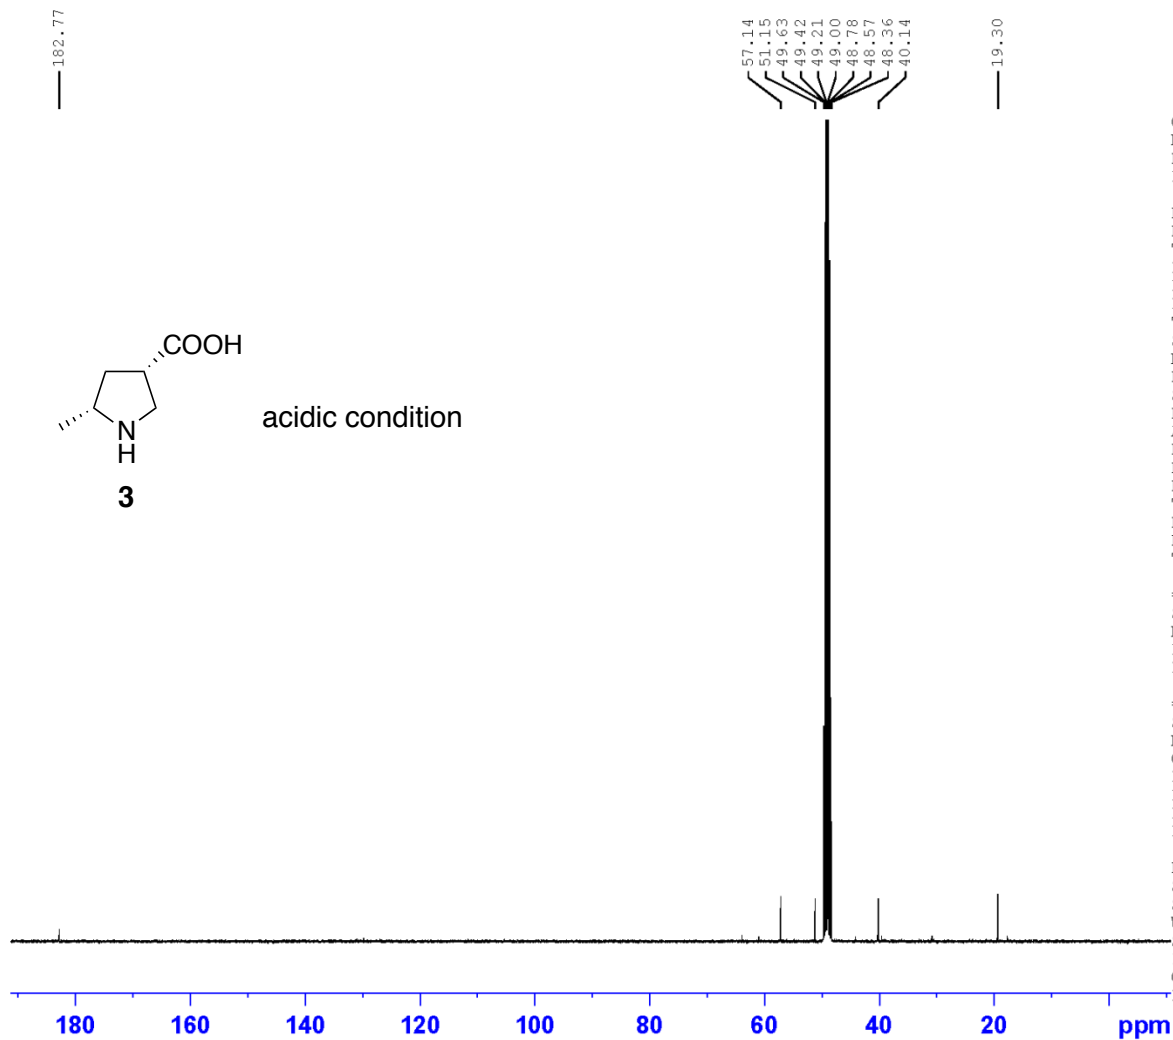

```

Current Data Parameters
NAME      yf-16-0814-637-w
EXPNO     11
PROCNO    1

F2 - Acquisition Parameters
Date_     20160814
Time      21.56
INSTRUM   spect
PROBHD    5 mm PABBO BB/
PULPROG   zgpg30
TD         65536
SOLVENT   CD3OD_SPE
NS         3000
DS         4
SWH        24038.461 Hz
FIDRES     0.366798 Hz
AQ         1.3631488 sec
RG         195.88
DW         20.800 usec
DE         6.50 usec
TE         299.9 K
D1         2.00000000 sec
D11        0.03000000 sec
TD0        1

===== CHANNEL f1 =====
SFO1      100.6228293 MHz
NUC1       13C
P1         10.00 usec
PLW1       70.00000000 W

===== CHANNEL f2 =====
SFO2      400.1316005 MHz
NUC2       1H
CPDPRG[2] waltz16
PCPD2      80.00 usec
PLW2       8.00000000 W
PLW12      0.28125000 W
PLW13      0.28125000 W

F2 - Processing parameters
SI         32768
SF         100.6126277 MHz
WDW        EM
SSB        0
LB         1.00 Hz
GB         0
PC         1.40

```



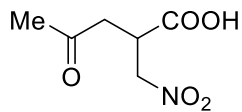

4

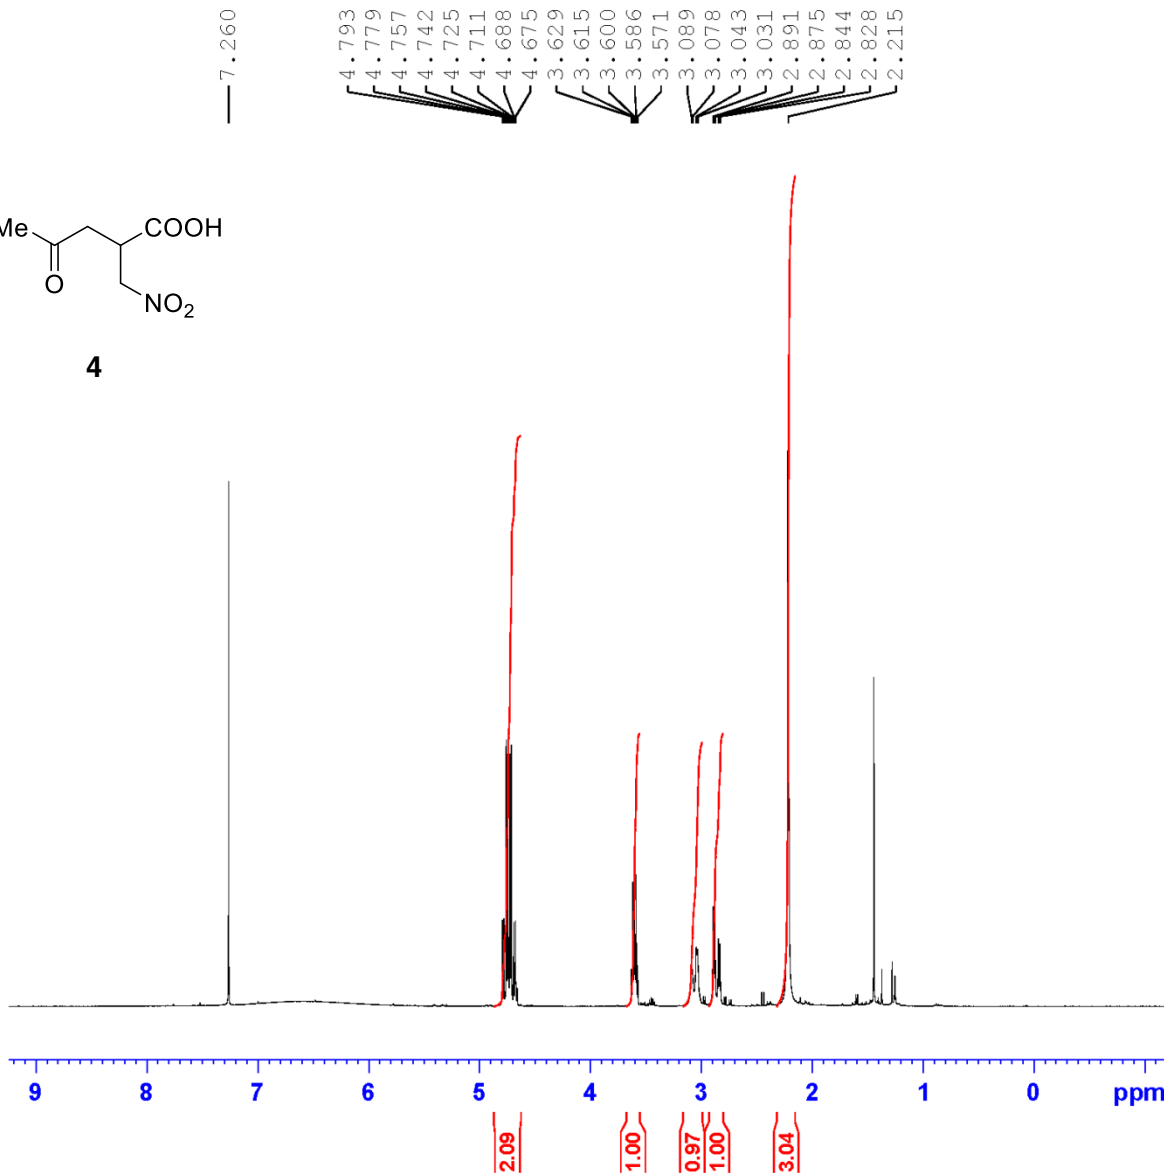

Current Data Parameters  
 NAME YF-17-0112-678  
 EXPNO 10  
 PROCNO 1

F2 - Acquisition Parameters  
 Date\_ 20170112  
 Time\_ 22.33  
 INSTRUM spect  
 PROBHD 5 mm PABBO BB/  
 PULPROG zg30  
 TD 65536  
 SOLVENT CDCl3  
 NS 16  
 DS 2  
 SWH 8012.820 Hz  
 FIDRES 0.122266 Hz  
 AQ 4.0894465 sec  
 RG 77.81  
 DW 62.400 usec  
 DE 6.50 usec  
 TE 298.7 K  
 D1 1.00000000 sec  
 TD0 1

==== CHANNEL f1 =====  
 SFO1 400.1324710 MHz  
 NUC1 1H  
 P1 15.00 usec  
 PLW1 7.50000000 W

F2 - Processing parameters  
 SI 65536  
 SF 400.1300095 MHz  
 WDW EM  
 SSB 0  
 LB 0.30 Hz  
 GB 0  
 PC 1.00

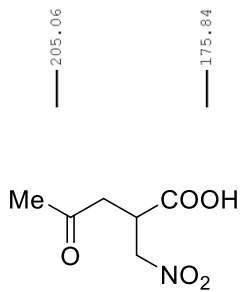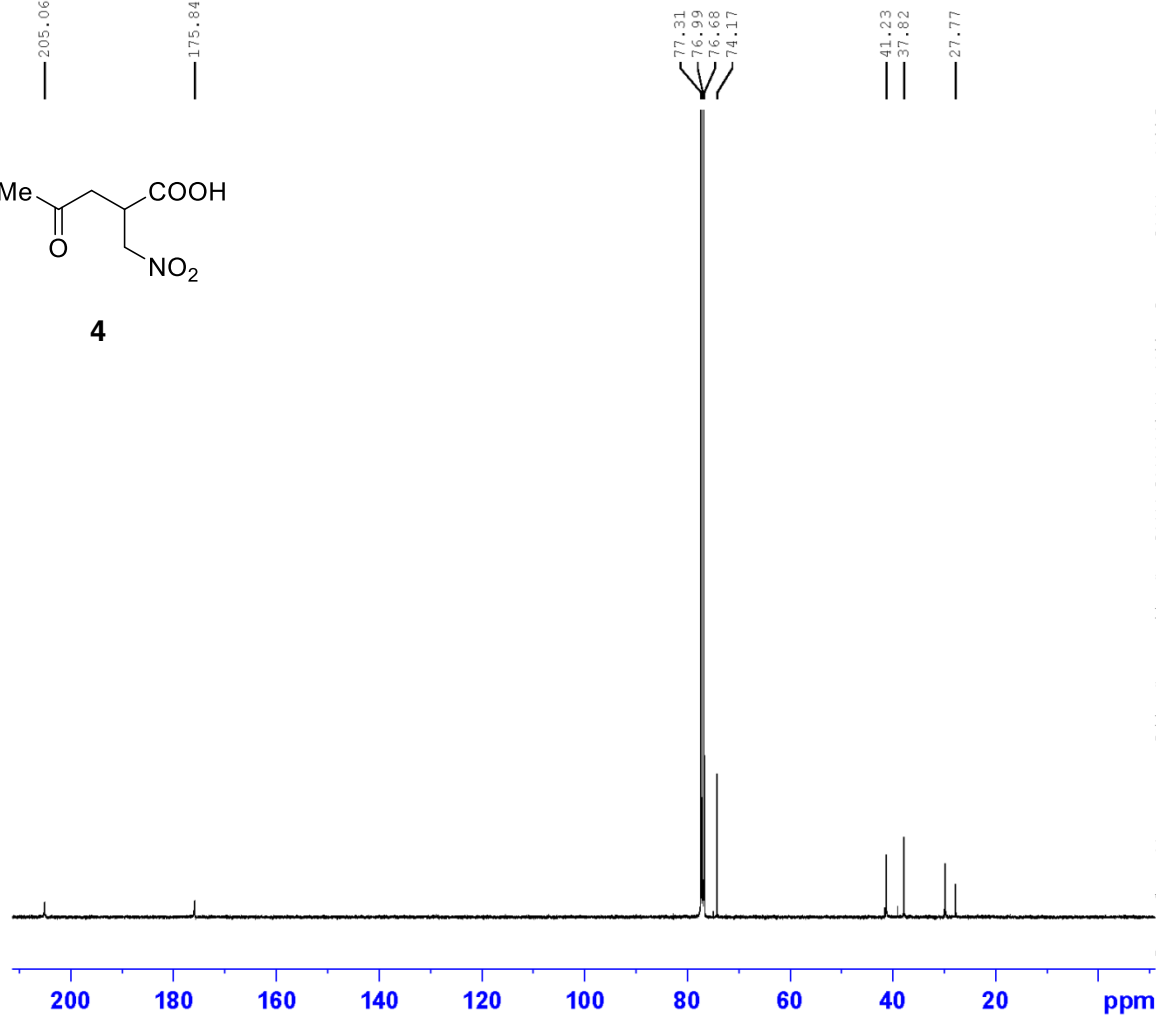

```

Current Data Parameters
NAME      YF-17-0112-678-C
EXPNO     10
PROCNO    1

F2 - Acquisition Parameters
Date_     20170113
Time      6.28
INSTRUM   spect
PROBHD    5 mm PABBO BB/
PULPROG   zgpg30
TD        65536
SOLVENT   CDCl3
NS        8000
DS        4
SWH       24038.461 Hz
FIDRES    0.366798 Hz
AQ        1.3631488 sec
RG        195.88
DW        20.800 usec
DE        6.50 usec
TE        299.4 K
D1        2.00000000 sec
D11       0.03000000 sec
TD0       1

===== CHANNEL f1 =====
SFO1      100.6228293 MHz
NUC1      13C
P1        10.00 usec
PLW1      72.00000000 W

===== CHANNEL f2 =====
SFO2      400.1316005 MHz
NUC2      1H
CPDPRG[2] waltz16
PCPD2     80.00 usec
PLW2      7.50000000 W
PLW12     0.26367000 W
PLW13     0.16633999 W

F2 - Processing parameters
SI        32768
SF        100.6127713 MHz
WDW       EM
SSB       0
LB        1.00 Hz
GB        0
PC        1.40

```

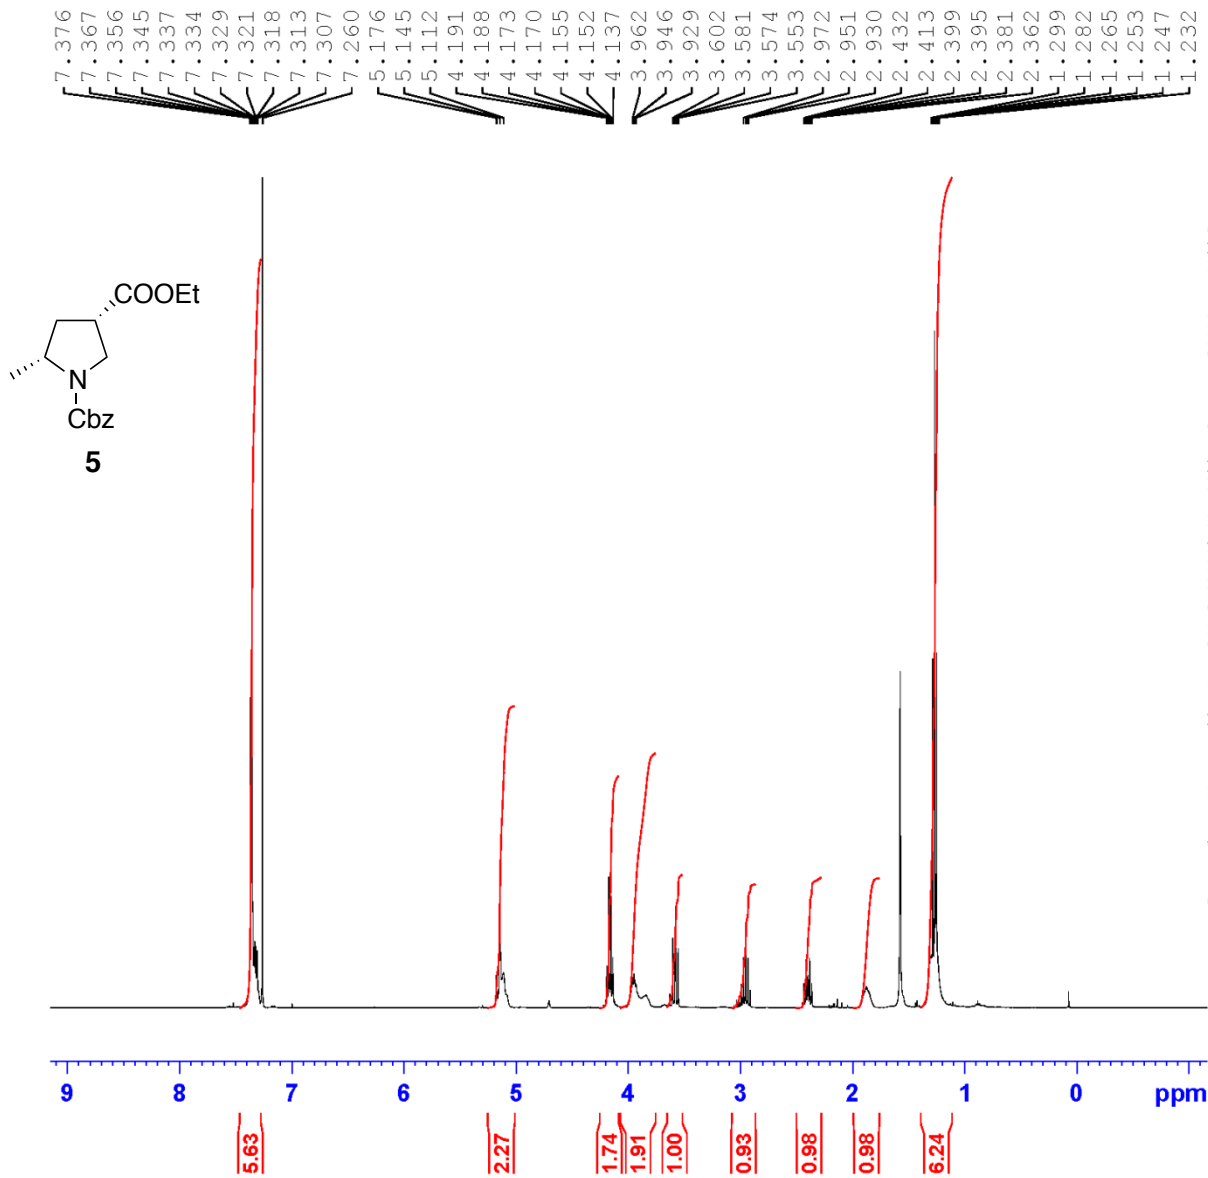

Current Data Parameters  
 NAME YF-17-0115-698-1  
 EXPNO 10  
 PROCNO 1

F2 - Acquisition Parameters  
 Date\_ 20170115  
 Time\_ 22.42  
 INSTRUM spect  
 PROBHD 5 mm PABBO BB/  
 PULPROG zg30  
 TD 65536  
 SOLVENT CDCl3  
 NS 16  
 DS 2  
 SWH 8012.820 Hz  
 FIDRES 0.122266 Hz  
 AQ 4.0894465 sec  
 RG 77.81  
 DW 62.400 usec  
 DE 6.50 usec  
 TE 298.7 K  
 D1 1.00000000 sec  
 TD0 1

==== CHANNEL f1 =====  
 SFO1 400.1324710 MHz  
 NUC1 1H  
 P1 15.00 usec  
 PLW1 7.50000000 W

F2 - Processing parameters  
 SI 65536  
 SF 400.1300095 MHz  
 WDW EM  
 SSB 0  
 LB 0.30 Hz  
 GB 0  
 PC 1.00

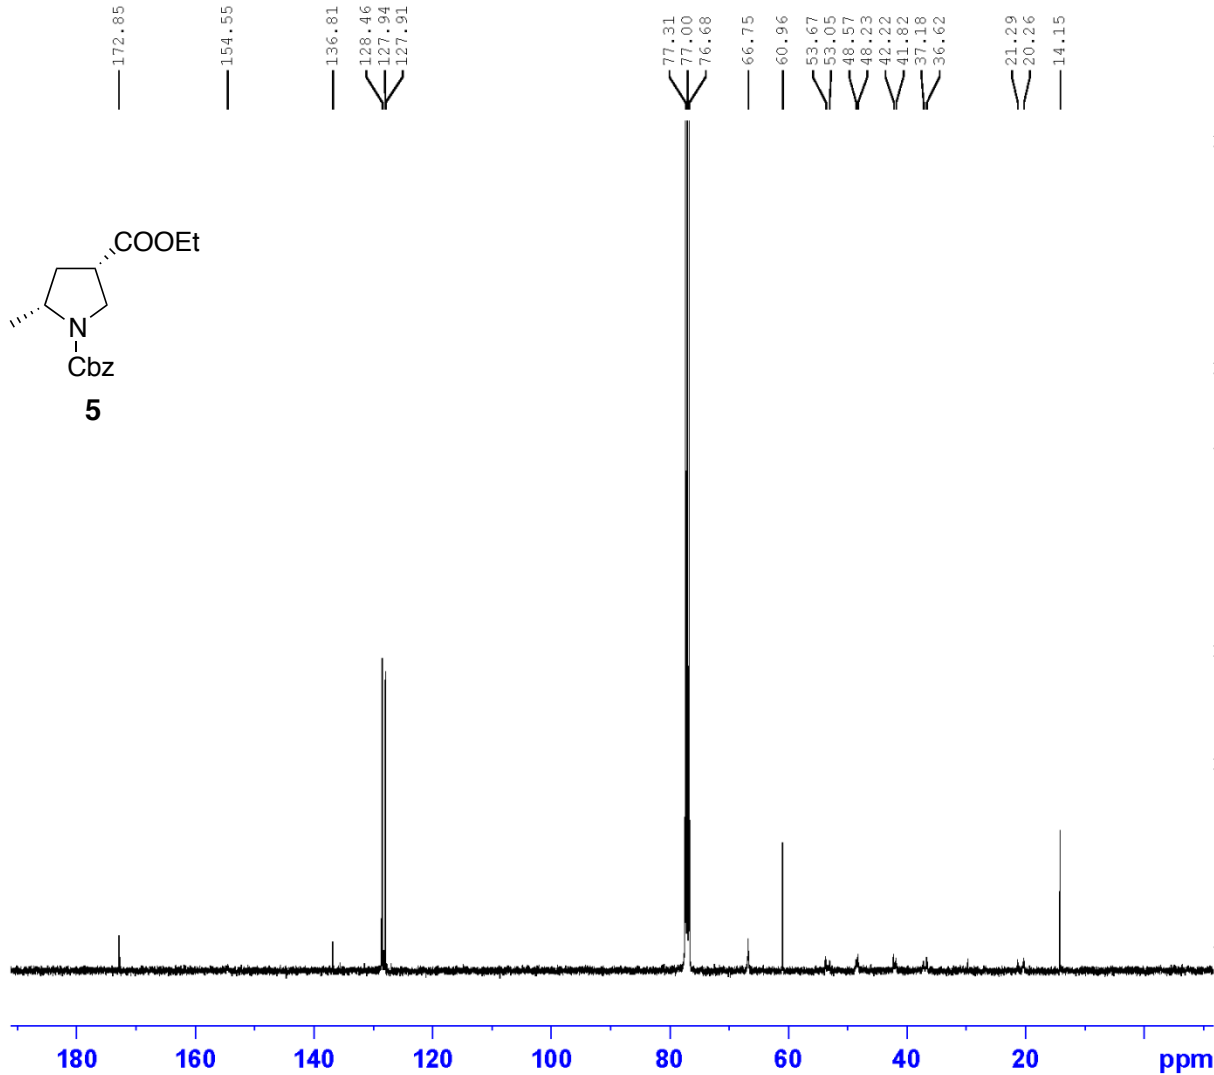

Current Data Parameters  
 NAME YF-17-0115-698-1-C  
 EXPNO 10  
 PROCNO 1

F2 - Acquisition Parameters  
 Date\_ 20170116  
 Time\_ 6.56  
 INSTRUM spect  
 PROBHD 5 mm PABBO BB/  
 PULPROG zgpg30  
 TD 65536  
 SOLVENT CDCl3  
 NS 8000  
 DS 4  
 SWH 24038.461 Hz  
 FIDRES 0.366798 Hz  
 AQ 1.3631488 sec  
 RG 195.88  
 DW 20.800 usec  
 DE 6.50 usec  
 TE 299.3 K  
 D1 2.00000000 sec  
 D11 0.03000000 sec  
 TD0 1

==== CHANNEL f1 =====  
 SFO1 100.6228293 MHz  
 NUC1 13C  
 P1 10.00 usec  
 PLW1 72.00000000 W

==== CHANNEL f2 =====  
 SFO2 400.1316005 MHz  
 NUC2 1H  
 CPDPRG[2] waltz16  
 PCPD2 80.00 usec  
 PLW2 7.50000000 W  
 PLW12 0.26367000 W  
 PLW13 0.16633999 W

F2 - Processing parameters  
 SI 32768  
 SF 100.6127706 MHz  
 WDW EM  
 SSB 0  
 LB 1.00 Hz  
 GB 0  
 PC 1.40

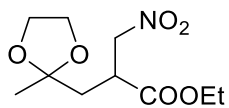

6

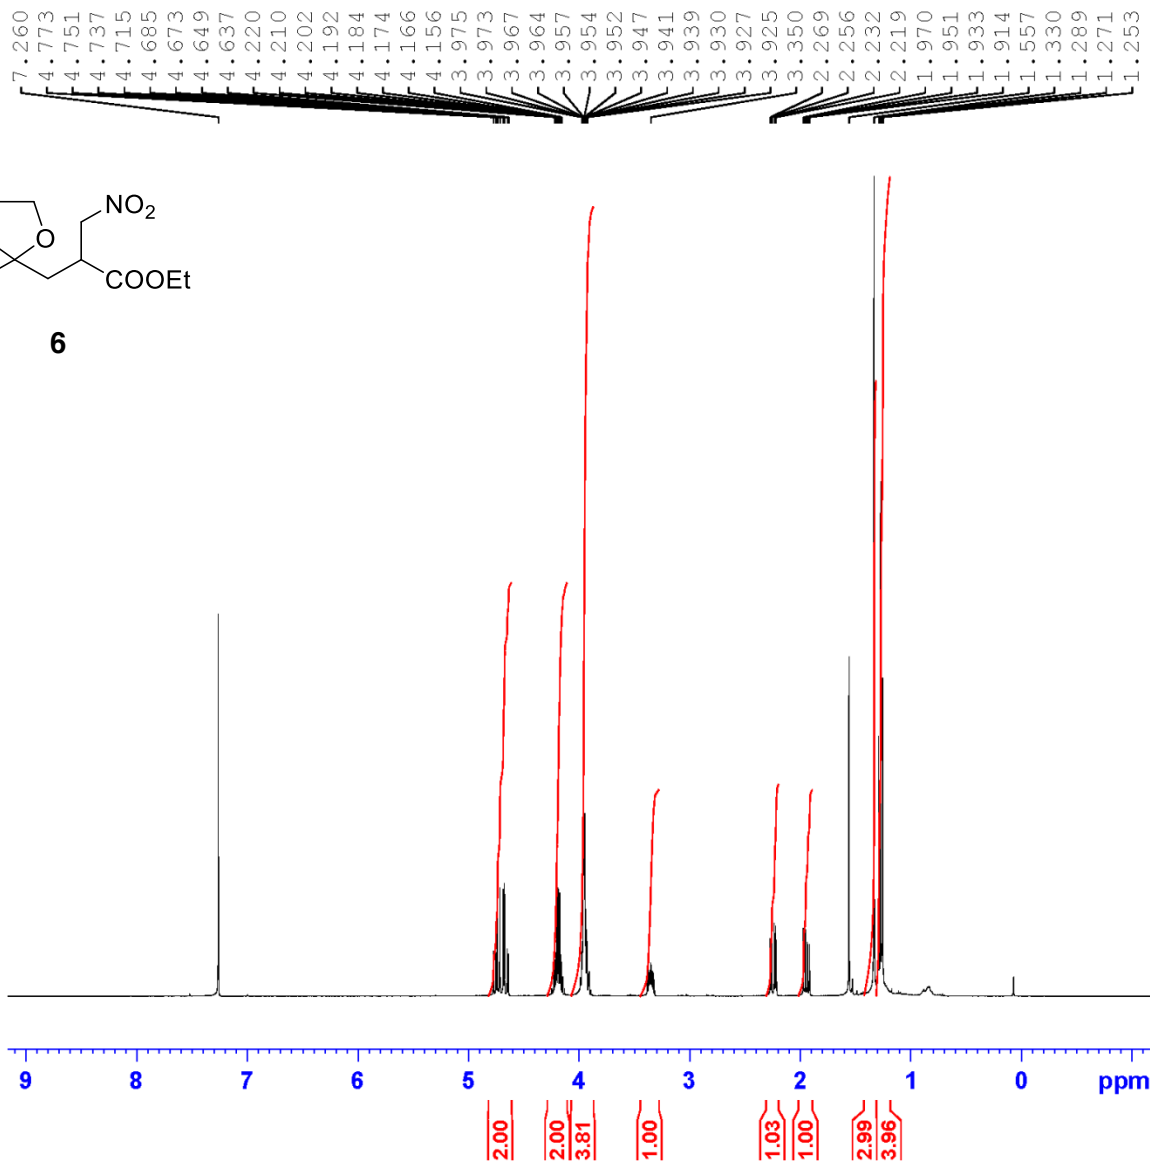

```

Current Data Parameters
NAME      YF-16-1208-AG16C
EXPNO     10
PROCNO    1

F2 - Acquisition Parameters
Date_     20161208
Time      11.44
INSTRUM   spect
PROBHD    5 mm PABBO BB/
PULPROG   zg30
TD         65536
SOLVENT   CDCl3
NS         16
DS         2
SWH        8012.820 Hz
FIDRES     0.122266 Hz
AQ         4.0894465 sec
RG         77.81
DW         62.400 usec
DE         6.50 usec
TE         298.5 K
D1         1.00000000 sec
TD0        1

===== CHANNEL f1 =====
SFO1      400.1324710 MHz
NUC1       1H
P1         15.00 usec
PLW1      7.50000000 W

F2 - Processing parameters
SI         65536
SF         400.1300095 MHz
WDW        EM
SSB        0
LB         0.30 Hz
GB         0
PC         1.00
  
```

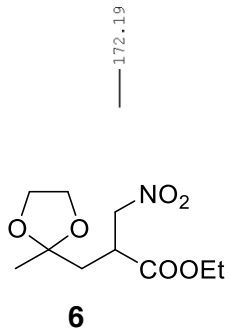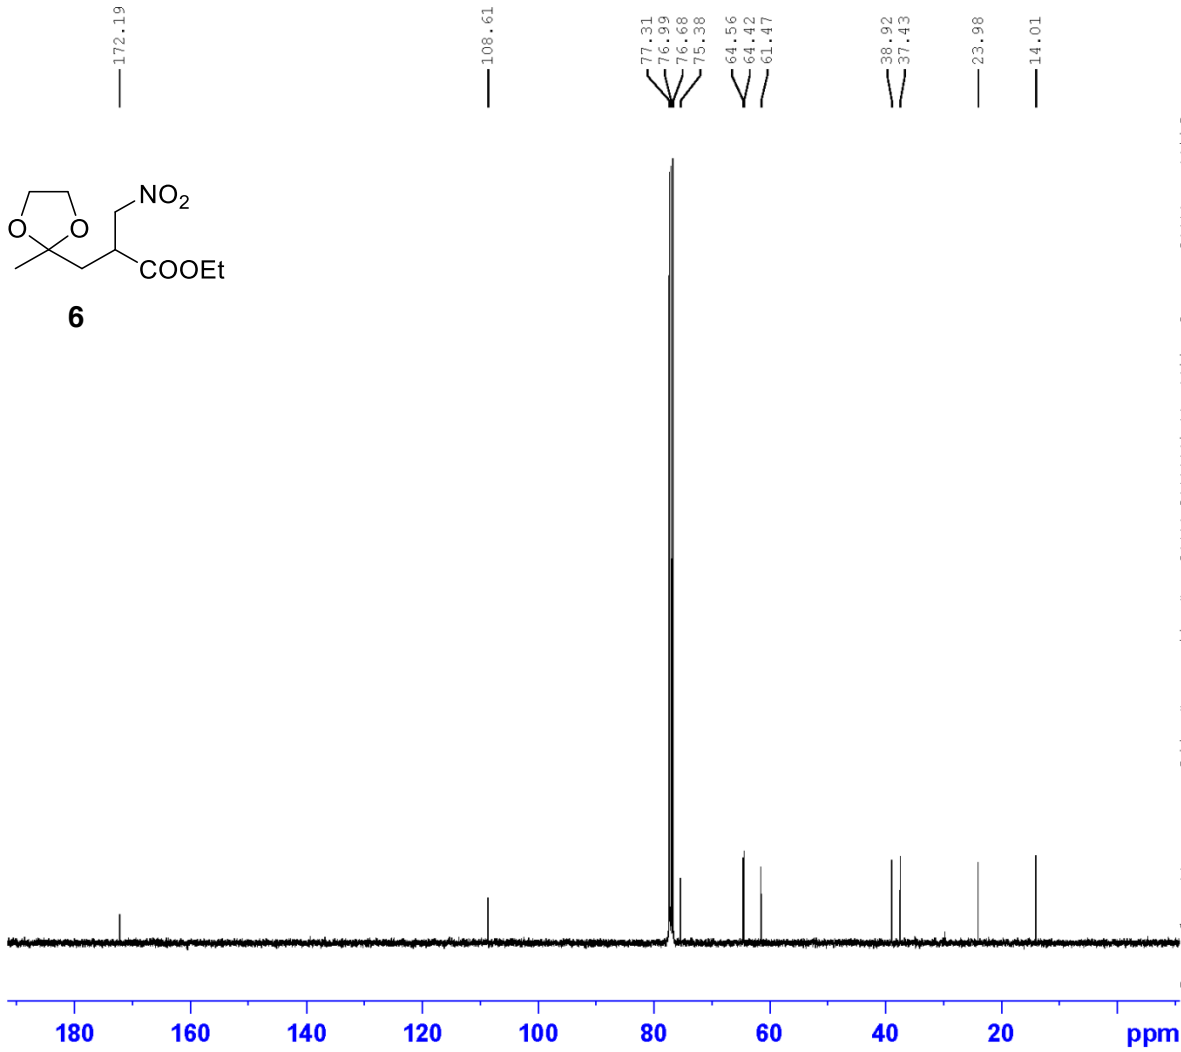

Current Data Parameters  
 NAME YF-16-1208-AG16C-C  
 EXPNO 10  
 PROCNO 1

F2 - Acquisition Parameters  
 Date\_ 20161208  
 Time\_ 12.40  
 INSTRUM spect  
 PROBHD 5 mm PABBO BB/  
 PULPROG zgpg30  
 TD 65536  
 SOLVENT CDC13  
 NS 1024  
 DS 4  
 SWH 24038.461 Hz  
 FIDRES 0.366798 Hz  
 AQ 1.3631488 sec  
 RG 195.88  
 DW 20.800 usec  
 DE 6.50 usec  
 TE 299.3 K  
 D1 2.00000000 sec  
 D11 0.03000000 sec  
 TD0 1

==== CHANNEL f1 =====  
 SFO1 100.6228293 MHz  
 NUC1 13C  
 P1 10.00 usec  
 PLW1 72.00000000 W

==== CHANNEL f2 =====  
 SFO2 400.1316005 MHz  
 NUC2 1H  
 CPDPRG[2] waltz16  
 PCPD2 80.00 usec  
 PLW2 7.50000000 W  
 PLW12 0.26367000 W  
 PLW13 0.16633999 W

F2 - Processing parameters  
 SI 32768  
 SF 100.6127706 MHz  
 WDW EM  
 SSB 0  
 LB 1.00 Hz  
 GB 0  
 PC 1.40

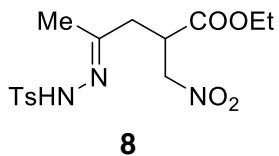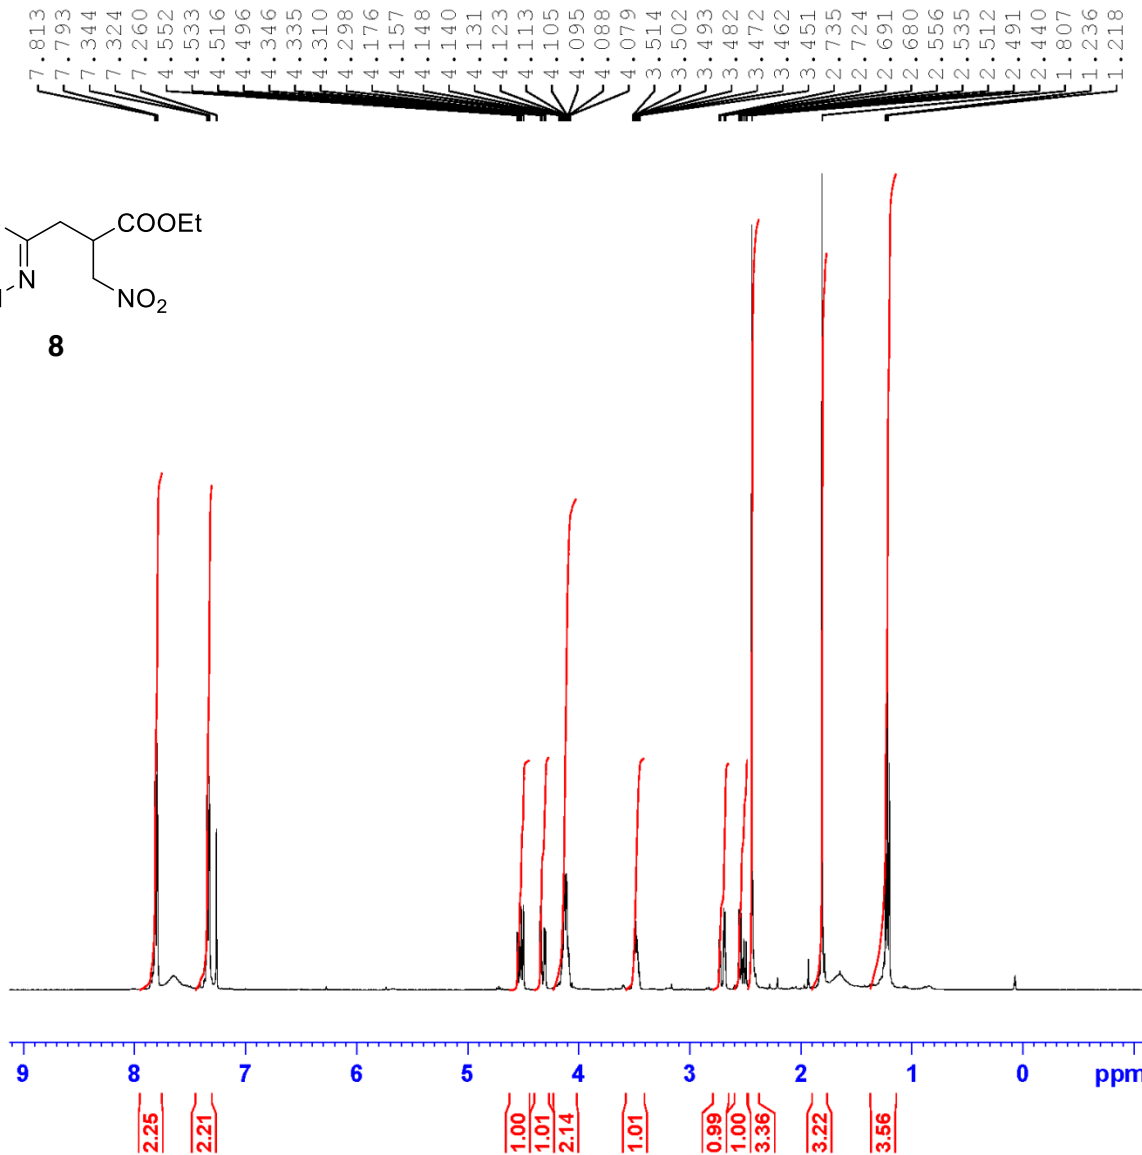

Current Data Parameters  
 NAME yf-16-0805-625p  
 EXPNO 10  
 PROCNO 1

F2 - Acquisition Parameters  
 Date\_ 20160805  
 Time\_ 10.29  
 INSTRUM spect  
 PROBHD 5 mm PABBO BB/  
 PULPROG zg30  
 TD 65536  
 SOLVENT CDC13  
 NS 16  
 DS 2  
 SWH 8012.820 Hz  
 FIDRES 0.122266 Hz  
 AQ 4.0894465 sec  
 RG 62.88  
 DW 62.400 usec  
 DE 6.50 usec  
 TE 298.7 K  
 D1 1.00000000 sec  
 TD0 1

===== CHANNEL f1 =====  
 SFO1 400.1324710 MHz  
 NUC1 1H  
 P1 15.00 usec  
 PLW1 8.00000000 W

F2 - Processing parameters  
 SI 65536  
 SF 400.1300093 MHz  
 WDW EM  
 SSB 0  
 LB 0.30 Hz  
 GB 0  
 PC 1.00

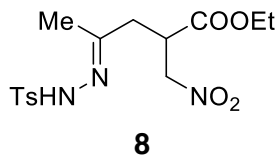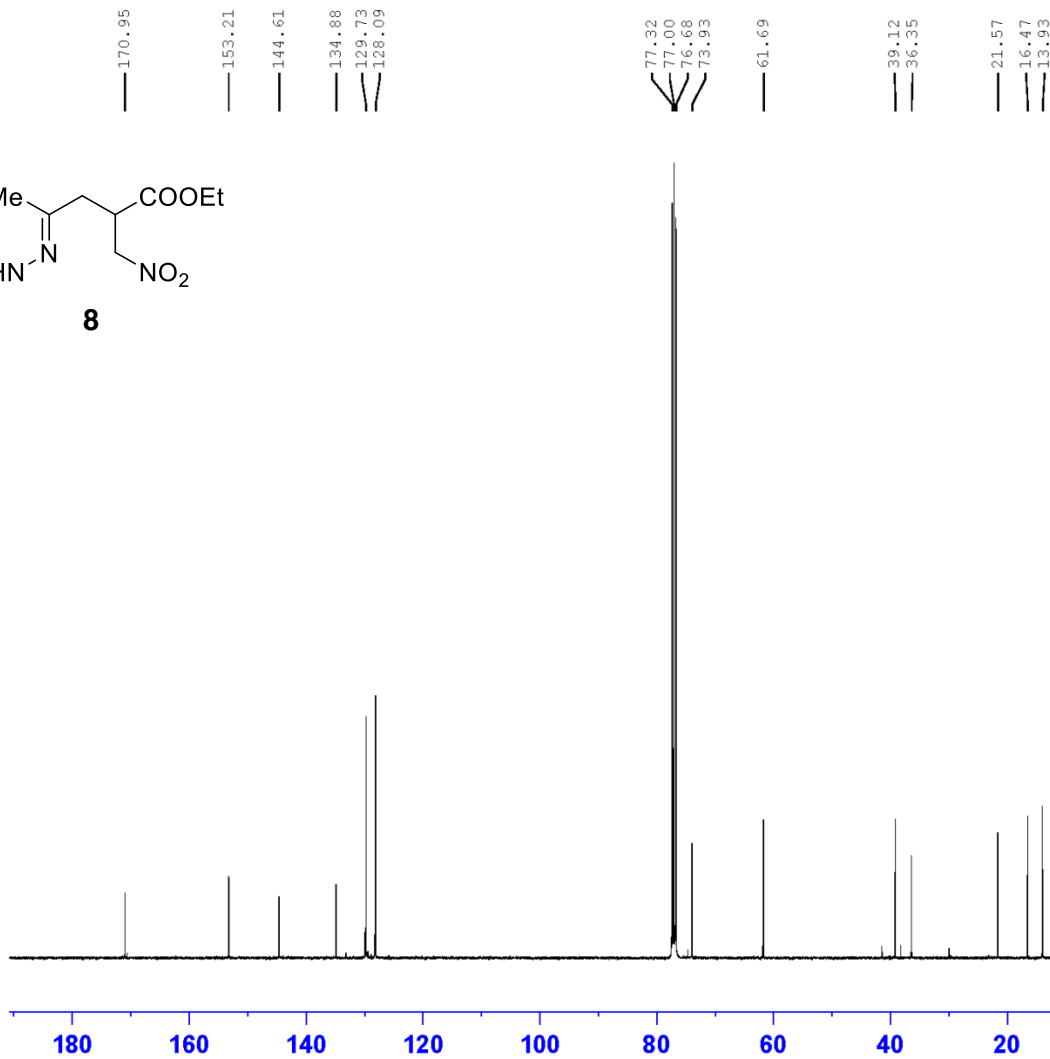

Current Data Parameters  
 NAME yf-16-0807-616p-C  
 EXPNO 10  
 PROCNO 1

F2 - Acquisition Parameters  
 Date\_ 20160808  
 Time\_ 6.24  
 INSTRUM spect  
 PROBHD 5 mm PABBO BB/  
 PULPROG zgpg30  
 TD 65536  
 SOLVENT CDC13  
 NS 10000  
 DS 4  
 SWH 24038.461 Hz  
 FIDRES 0.366798 Hz  
 AQ 1.3631488 sec  
 RG 195.88  
 DW 20.800 usec  
 DE 6.50 usec  
 TE 299.9 K  
 D1 2.00000000 sec  
 D11 0.03000000 sec  
 TD0 1

==== CHANNEL f1 =====  
 SFO1 100.6228293 MHz  
 NUC1 13C  
 P1 10.00 usec  
 PLW1 70.00000000 W

==== CHANNEL f2 =====  
 SFO2 400.1316005 MHz  
 NUC2 1H  
 CPDPRG[2] waltz16  
 PCPD2 80.00 usec  
 PLW2 8.00000000 W  
 PLW12 0.28125000 W  
 PLW13 0.28125000 W

F2 - Processing parameters  
 SI 32768  
 SF 100.6127713 MHz  
 WDW EM  
 SSB 0  
 LB 1.00 Hz  
 GB 0  
 PC 1.40



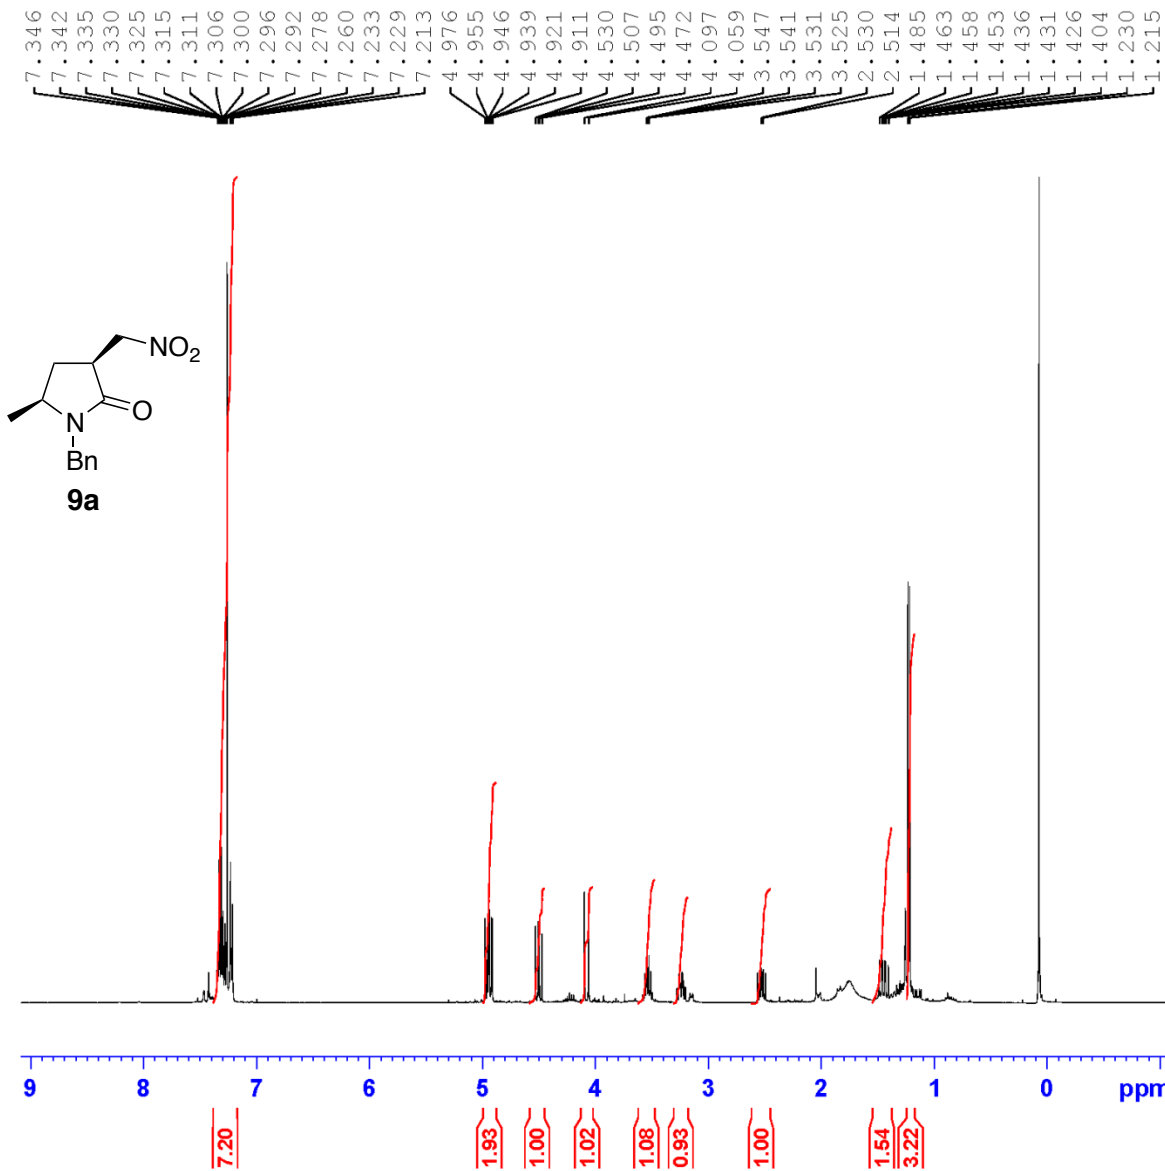

171.75  
136.08  
128.77  
127.93  
127.69

77.31  
76.99  
76.67  
76.25

51.08  
44.29  
40.75  
32.78  
19.93

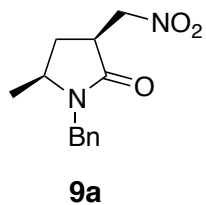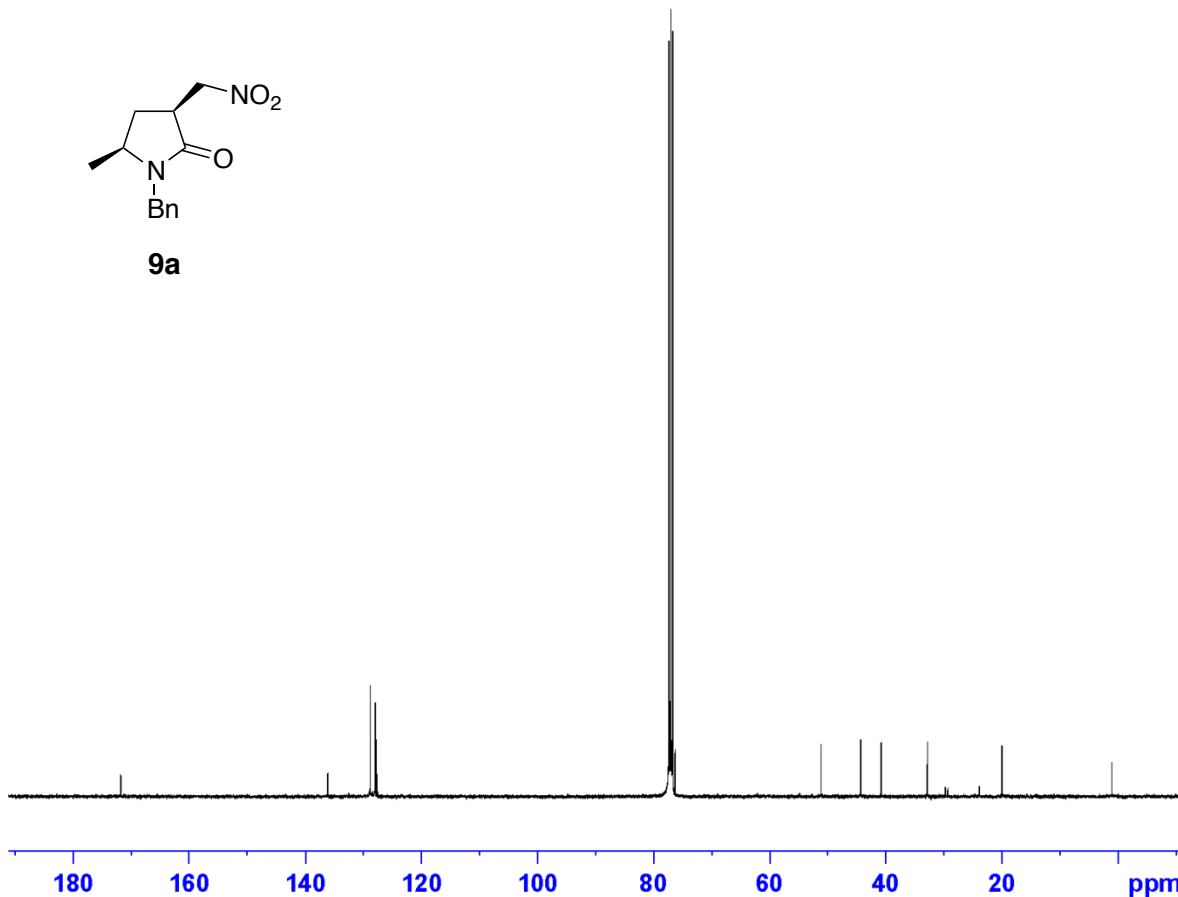

Current Data Parameters  
NAME YF-16-1018-658-2-C  
EXPNO 10  
PROCNO 1

F2 - Acquisition Parameters  
Date\_ 20161019  
Time\_ 6.37  
INSTRUM spect  
PROBHD 5 mm PABBO BB/  
PULPROG zgpg30  
TD 65536  
SOLVENT CDCl3  
NS 8000  
DS 4  
SWH 24038.461 Hz  
FIDRES 0.366798 Hz  
AQ 1.3631488 sec  
RG 195.88  
DW 20.800 usec  
DE 6.50 usec  
TE 300.0 K  
D1 2.00000000 sec  
D11 0.03000000 sec  
TD0 1

===== CHANNEL f1 =====  
SFO1 100.6228293 MHz  
NUC1 13C  
P1 10.00 usec  
PLW1 70.00000000 W

===== CHANNEL f2 =====  
SFO2 400.1316005 MHz  
NUC2 1H  
CPDPRG[2] waltz16  
PCPD2 80.00 usec  
PLW2 8.00000000 W  
PLW12 0.28125000 W  
PLW13 0.28125000 W

F2 - Processing parameters  
SI 32768  
SF 100.6127708 MHz  
WDW EM  
SSB 0  
LB 1.00 Hz  
GB 0  
PC 1.40

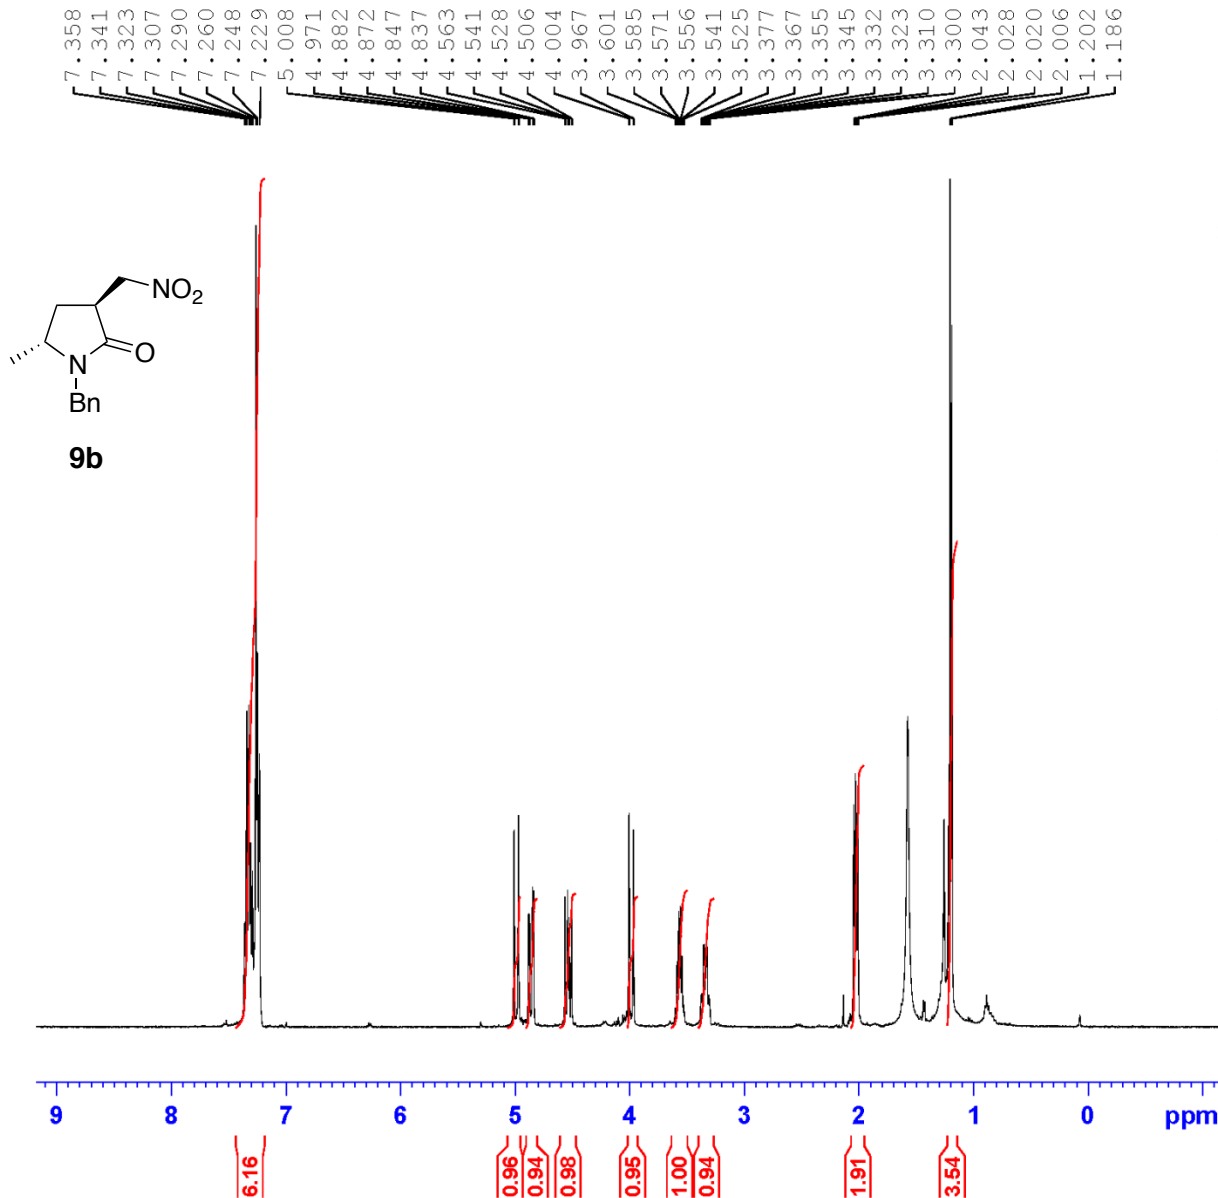

Current Data Parameters  
 NAME YF-16-0805-626-2  
 EXPNO 10  
 PROCNO 1

F2 - Acquisition Parameters  
 Date\_ 20160805  
 Time\_ 22.15  
 INSTRUM spect  
 PROBHD 5 mm PABBO BB/  
 PULPROG zg30  
 TD 65536  
 SOLVENT CDCl3  
 NS 16  
 DS 2  
 SWH 8012.820 Hz  
 FIDRES 0.122266 Hz  
 AQ 4.089465 sec  
 RG 88.94  
 DW 62.400 usec  
 DE 6.50 usec  
 TE 298.6 K  
 D1 1.00000000 sec  
 TD0 1

==== CHANNEL f1 =====  
 SFO1 400.1324710 MHz  
 NUC1 1H  
 P1 15.00 usec  
 PLW1 8.00000000 W

F2 - Processing parameters  
 SI 65536  
 SF 400.1300091 MHz  
 WDW EM  
 SSB 0  
 LB 0.30 Hz  
 GB 0  
 PC 1.00

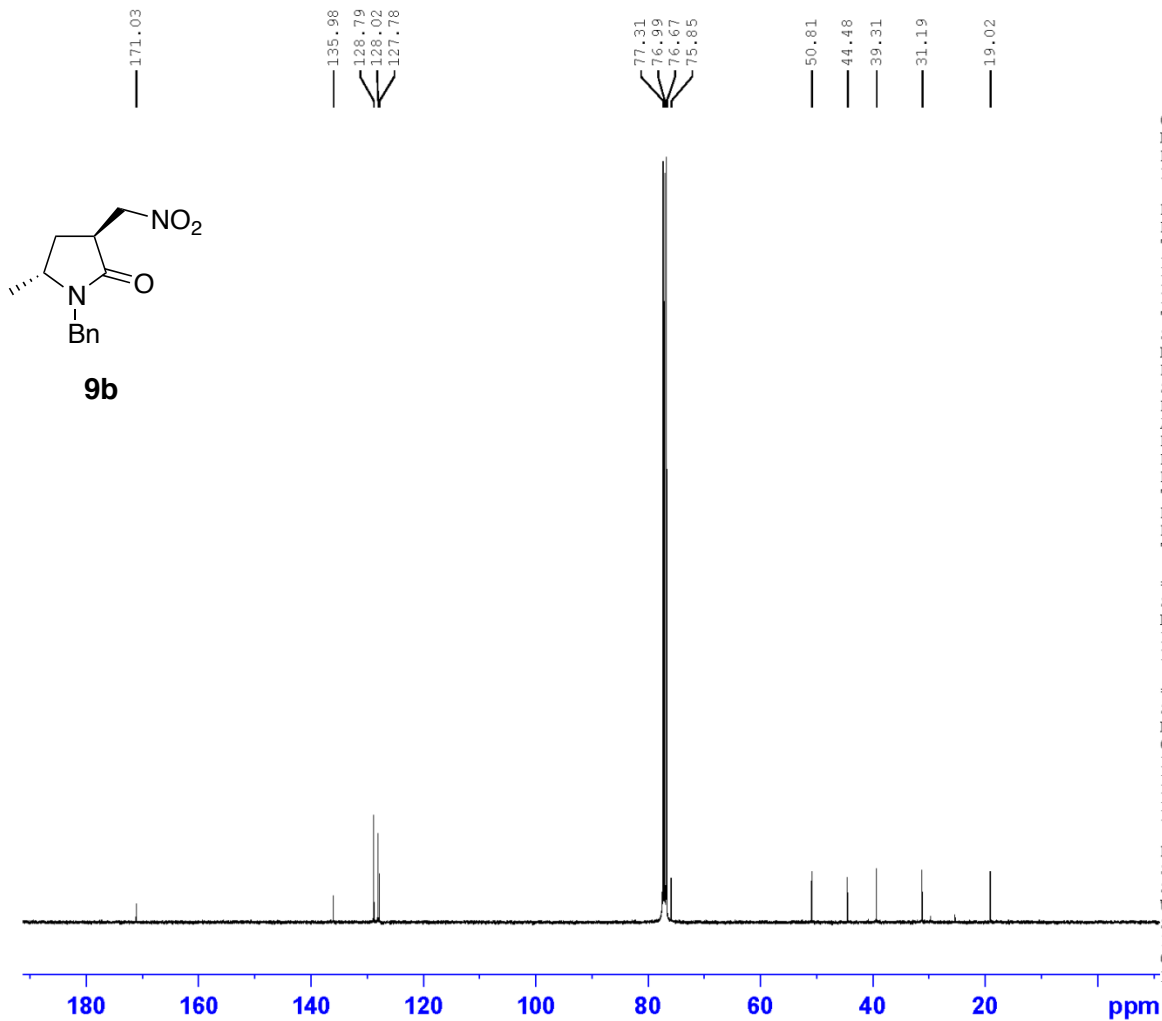

Current Data Parameters  
 NAME yf-16-0817-626-2-c  
 EXPNO 10  
 PROCNO 1

F2 - Acquisition Parameters  
 Date\_ 20160818  
 Time\_ 6.23  
 INSTRUM spect  
 PROBHD 5 mm PABBO BB/  
 PULPROG zgpg30  
 TD 65536  
 SOLVENT CDCl3  
 NS 8000  
 DS 4  
 SWH 24038.461 Hz  
 FIDRES 0.366798 Hz  
 AQ 1.3631488 sec  
 RG 195.88  
 DW 20.800 usec  
 DE 6.50 usec  
 TE 300.1 K  
 D1 2.00000000 sec  
 D11 0.03000000 sec  
 TD0 1

==== CHANNEL f1 =====  
 SFO1 100.6228293 MHz  
 NUC1 13C  
 P1 10.00 usec  
 PLW1 70.00000000 W

==== CHANNEL f2 =====  
 SFO2 400.1316005 MHz  
 NUC2 1H  
 CPDPRG[2] waltz16  
 FCPD2 80.00 usec  
 PLW2 8.00000000 W  
 PLW12 0.28125000 W  
 PLW13 0.28125000 W

F2 - Processing parameters  
 SI 32768  
 SF 100.6127706 MHz  
 WDW EM  
 SSB 0  
 LB 1.00 Hz  
 GB 0  
 PC 1.40

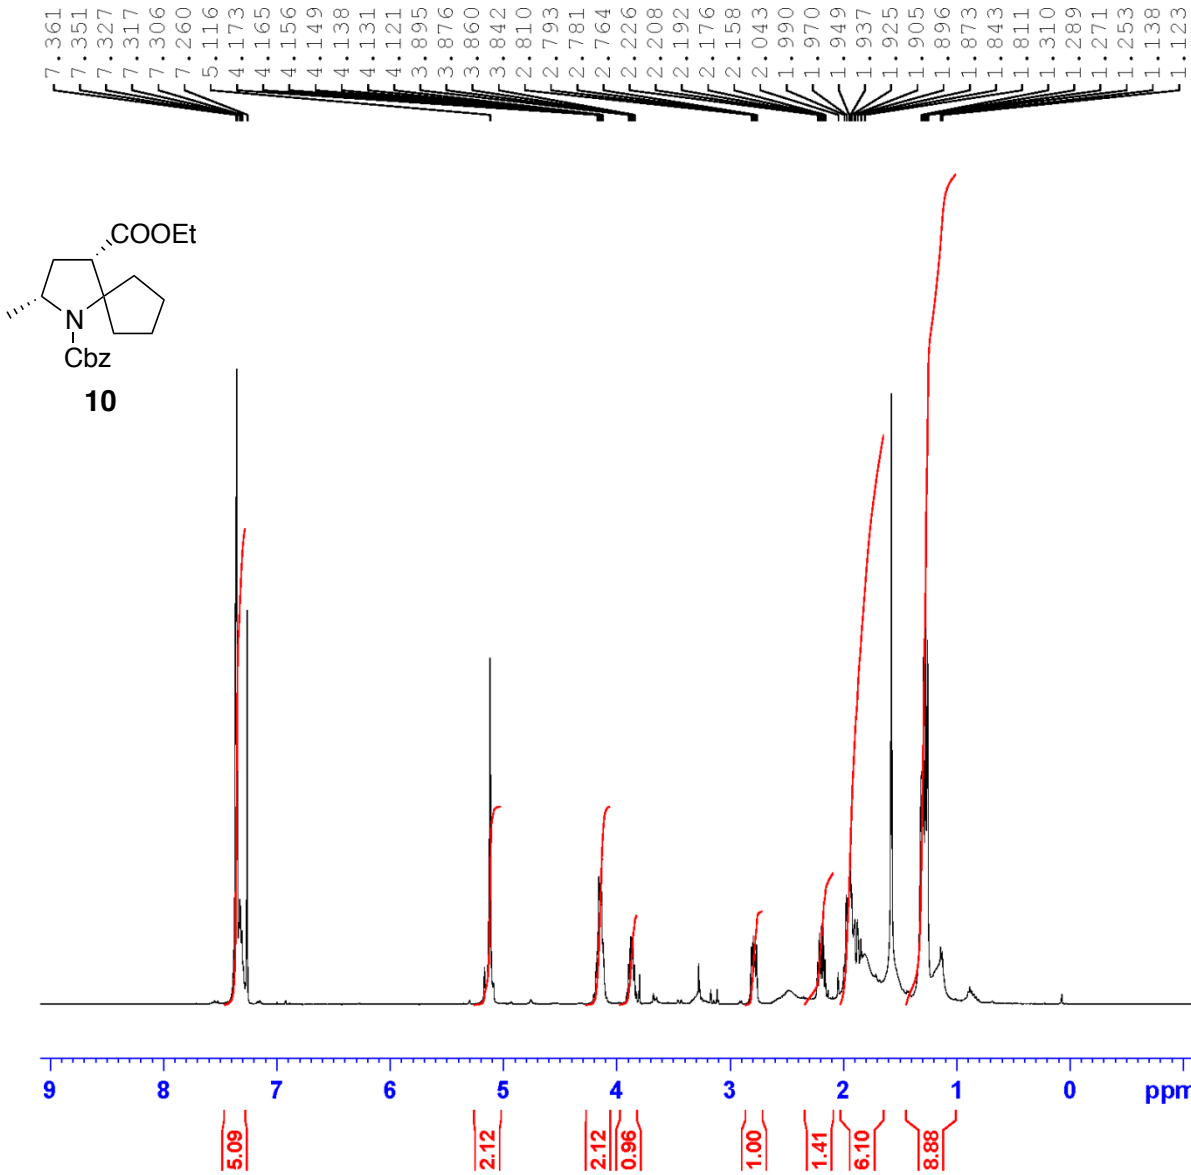

Current Data Parameters  
 NAME YF-16-0828-647-1  
 EXPNO 10  
 PROCNO 1

F2 - Acquisition Parameters  
 Date\_ 20160828  
 Time\_ 21.58  
 INSTRUM spect  
 PROBHD 5 mm PABBO BB/  
 PULPROG zg30  
 TD 65536  
 SOLVENT CDCl3  
 NS 16  
 DS 2  
 SWH 8012.820 Hz  
 FIDRES 0.122266 Hz  
 AQ 4.0894465 sec  
 RG 71.01  
 DW 62.400 usec  
 DE 6.50 usec  
 TE 298.9 K  
 D1 1.00000000 sec  
 TD0 1

==== CHANNEL f1 =====  
 SFO1 400.1324710 MHz  
 NUC1 1H  
 P1 15.00 usec  
 PLW1 8.00000000 W

F2 - Processing parameters  
 SI 65536  
 SF 400.1300091 MHz  
 WDW EM  
 SSB 0  
 LB 0.30 Hz  
 GB 0  
 PC 1.00

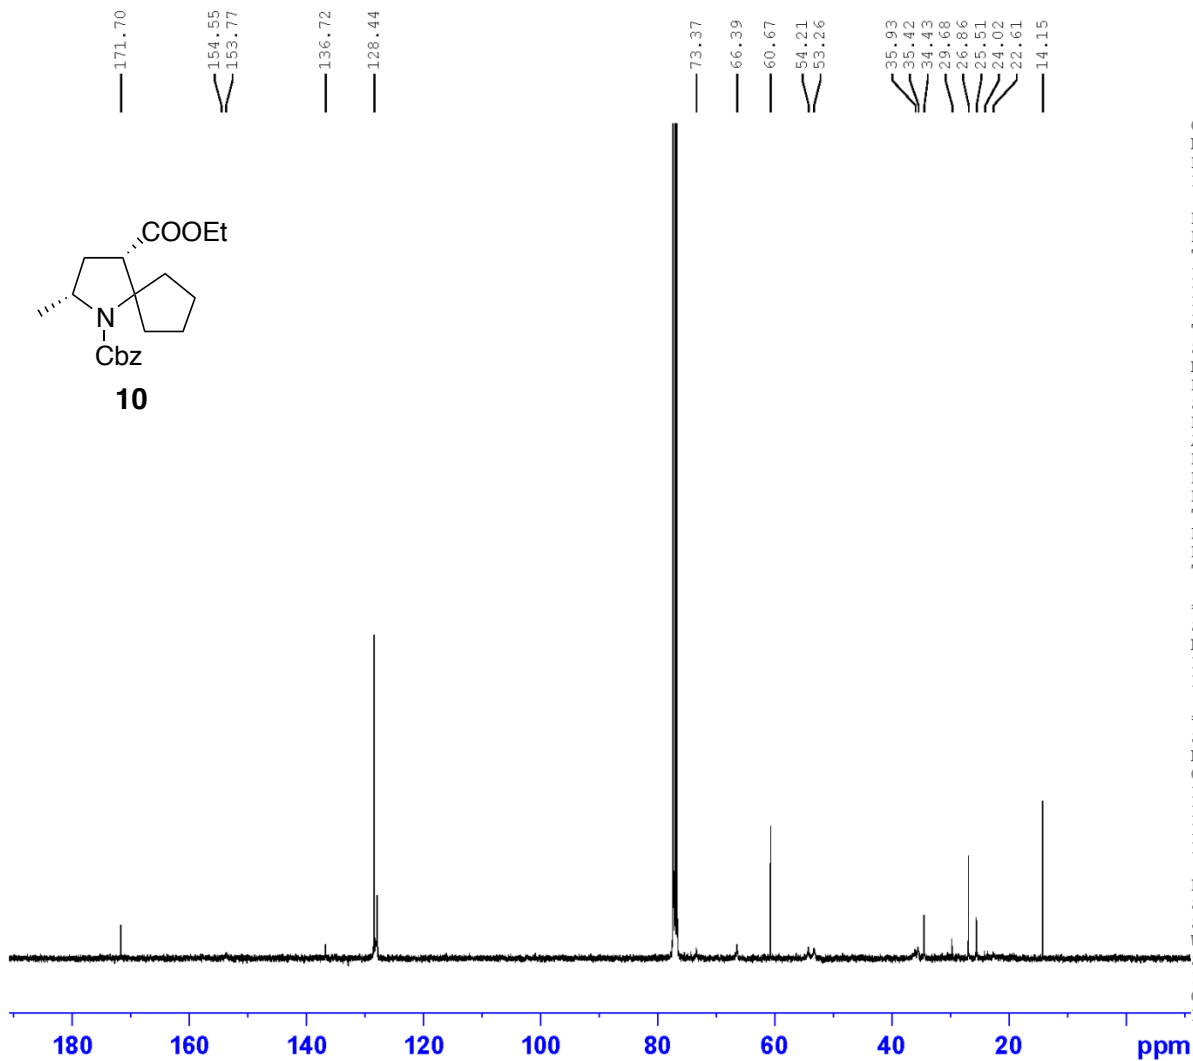

Current Data Parameters  
 NAME YF-16-0828-647-1-C  
 EXPNO 20  
 PROCNO 1

F2 - Acquisition Parameters  
 Date\_ 20160829  
 Time\_ 6.22  
 INSTRUM spect  
 PROBHD 5 mm PABBO BB/  
 PULPROG zgpg30  
 TD 65536  
 SOLVENT CDCl3  
 NS 8000  
 DS 4  
 SWH 24038.461 Hz  
 FIDRES 0.366798 Hz  
 AQ 1.3631488 sec  
 RG 195.88  
 DW 20.800 usec  
 DE 6.50 usec  
 TE 299.9 K  
 D1 2.00000000 sec  
 D11 0.03000000 sec  
 TD0 1

==== CHANNEL f1 =====  
 SFO1 100.6228293 MHz  
 NUC1 13C  
 P1 10.00 usec  
 PLW1 70.00000000 W

==== CHANNEL f2 =====  
 SFO2 400.1316005 MHz  
 NUC2 1H  
 CPDPRG[2] waltz16  
 PCPD2 80.00 usec  
 PLW2 8.00000000 W  
 PLW12 0.28125000 W  
 PLW13 0.28125000 W

F2 - Processing parameters  
 SI 32768  
 SF 100.6127706 MHz  
 WDW EM  
 SSB 0  
 LB 1.00 Hz  
 GB 0  
 PC 1.40
